# Supplementary material for: Inconsistent condom use by male clients during anal intercourse with occasional and regular female sex workers (FSWs): survey findings from southern states of India
Source: PubMed Central journal article supplement — BMJ Open. 2014 Nov 19;4(11):e005166. doi: 10.1136/bmjopen-2014-005166 (PMC4244455; doi:10.1136/bmjopen-2014-005166), 2014-11-19
Supplement: bmjopen-2014-005166.draft_revisions.pdf [file bmjopen-2014-005166.draft_revisions.pdf]

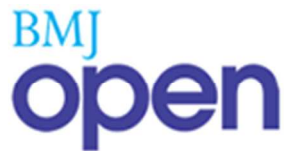

**Inconsistent condom use by male clients during anal intercourse with female sex workers (FSWs): Survey findings from three high-prevalence states of India**

|                                 |                                                                                                                                                                                                                                                                                                                                                                                                                                                                                                            |
|---------------------------------|------------------------------------------------------------------------------------------------------------------------------------------------------------------------------------------------------------------------------------------------------------------------------------------------------------------------------------------------------------------------------------------------------------------------------------------------------------------------------------------------------------|
| Journal:                        | <i>BMJ Open</i>                                                                                                                                                                                                                                                                                                                                                                                                                                                                                            |
| Manuscript ID:                  | bmjopen-2014-005166                                                                                                                                                                                                                                                                                                                                                                                                                                                                                        |
| Article Type:                   | Research                                                                                                                                                                                                                                                                                                                                                                                                                                                                                                   |
| Date Submitted by the Author:   | 01-Mar-2014                                                                                                                                                                                                                                                                                                                                                                                                                                                                                                |
| Complete List of Authors:       | Ramanathan, Shreena; FHI 360, Nagarajan, Karikalan; National AIDS Research Institute Ramakrishnan, Lakshmi; FHI 360, Mainkar, Mandar; National AIDS Research Institute Goswami, Prabuddhagopal; FHI 360, Yadav, Diwakar; Formerly with FHI 360, Sen, Shrabanti; FHI 360, George, Bitra; FHI 360, Rachakulla, Hari; National Institute of Nutrition, Division of community studies Subramanian, Thilakavath; National Institute of Epidemiology, ICMR, Paranjape, Ramesh; National AIDS Research Institute, |
| <b>Primary Subject Heading</b>: | HIV/AIDS                                                                                                                                                                                                                                                                                                                                                                                                                                                                                                   |
| Secondary Subject Heading:      | Public health                                                                                                                                                                                                                                                                                                                                                                                                                                                                                              |
| Keywords:                       | Clients of sex workers, HIV/AIDS, Anal intercourse                                                                                                                                                                                                                                                                                                                                                                                                                                                         |
|                                 |                                                                                                                                                                                                                                                                                                                                                                                                                                                                                                            |

SCHOLARONE™  
Manuscripts

1  
2  
3 **Title: Inconsistent condom use by male clients during anal intercourse with female sex**  
4 **workers (FSWs): Survey findings from three high-prevalence states of India**  
5  
6  
7  
8  
9  
10

11 **Authors:** Shreena Ramanathan<sup>1\*</sup>, Karikalan Nagarajan<sup>2</sup>, Lakshmi Ramakrishnan<sup>1</sup>, Mandar K  
12 Mainkar<sup>2</sup>, Prabuddhagopal Goswami<sup>1</sup>, Diwakar Yadav<sup>3</sup>, Shrabanti Sen<sup>1</sup>, Bitra George<sup>1</sup>,  
13 Harikumar Rachakulla<sup>4</sup>, Thilakavathi Subramanian<sup>5</sup>, Ramesh S. Paranjape<sup>2</sup>  
14  
15  
16  
17  
18

19  
20 \*Corresponding author  
21  
22  
23  
24  
25  
26

27 **Affiliations:**  
28

29  
30 <sup>1</sup>FHI 360 India, H-5 (Ground Floor), Green Park Extension, New Delhi - 110016, India  
31

32 <sup>2</sup>National AIDS Research Institute, T 71-1A/2, M.I.D.C., Telco Road, Bhosari, Pune - 411026,  
33 India  
34  
35

36  
37 <sup>3</sup>Formerly with FHI 360  
38

39 <sup>4</sup>National Institute of Nutrition (ICMR), Tarnaka, Jamai Osmania, Hyderabad - 500007, India  
40

41 <sup>5</sup>National Institute of Epidemiology (ICMR), Second Main Road, TNHB, Ayapakkam, Chennai -  
42 600077, India  
43  
44  
45  
46  
47  
48

49 **Emails:**  
50

51  
52 SR: [sramanathan@fhi360.org](mailto:sramanathan@fhi360.org)  
53

54 KN: [drkarikalan82@gmail.com](mailto:drkarikalan82@gmail.com)  
55

56 LR: [lramakrishnan@fhi360.org](mailto:lramakrishnan@fhi360.org)  
57  
58  
59  
60

1  
2  
3 MM: [mandar5670@gmail.com](mailto:mandar5670@gmail.com)  
4

5 PG: [pgoswami@fhi360.org](mailto:pgoswami@fhi360.org)  
6

7 DY: [yadavdiwakar7@gmail.com](mailto:yadavdiwakar7@gmail.com)  
8

9 SS: [SSen@fhi360.org](mailto:SSen@fhi360.org)  
10

11 BG: [BGeorge@fhi360.org](mailto:BGeorge@fhi360.org)  
12

13 HR: [drharikumar1959@yahoo.co.in](mailto:drharikumar1959@yahoo.co.in)  
14

15 TS: [thilakavathi\\_s@rediffmail.com](mailto:thilakavathi_s@rediffmail.com)  
16

17 RSP: [rparanjape@nariindia.org](mailto:rparanjape@nariindia.org)  
18  
19  
20  
21  
22  
23  
24  
25  
26  
27  
28  
29  
30  
31  
32  
33  
34  
35  
36  
37  
38  
39  
40  
41  
42  
43  
44  
45  
46  
47  
48  
49  
50  
51  
52  
53  
54  
55  
56  
57  
58  
59  
60

## **Abstract**

### **Objectives**

Recent studies from India have documented varying estimates of self-reported anal intercourse (ranging 3% to 80%) by female sex workers (FSWs). However, comparable data on anal intercourse and condom use from male clients of FSWs is lacking. Using data from a bio-behavioural survey (2009–2010), we examined prevalence of anal intercourse, male clients' self-reported inconsistent condom use during anal intercourse with FSWs, and correlates of this behavior in three of India's high-prevalence states — Andhra Pradesh, Maharashtra and Tamil Nadu.

### **Methods**

Using two-stage time location cluster sampling, we recruited 4,803 clients of FSWs, ages 18–60 years, who had purchased sex from an FSW in the past month. After obtaining informed consent, respondents were interviewed and tested for HIV and STIs (syphilis, gonorrhoea and chlamydia). Logistic regression analysis was used to identify the factors associated with inconsistent condom use during anal intercourse (in the past six months) with FSWs.

### **Results**

Overall, 12.4% clients reported anal intercourse in the past six months, of which 48.4% used condoms inconsistently. Clients of FSWs who were ages 26 years or older (AOR: 2.68,  $p=0.032$ ); employed as manual laborers (AOR: 2.43,  $p=0.013$ ); consumed alcohol (AOR: 2.63,  $p=0.001$ ), reported five or more sex acts with FSWs in the past month (AOR: 2.53,  $p=0.031$ ) and perceived

1  
2  
3 themselves to be at higher risk for HIV (AOR: 4.82, p=0.001) were more likely to inconsistently  
4 use condoms during anal intercourse.  
5  
6  
7

## 8 9 **Conclusion**

10 The results suggest that sex workers and their clients commonly practice anal intercourse, but a  
11 relatively high proportion of clients do not consistently use condoms, leading to a greater risk of  
12 acquiring HIV and its further transmission to other male and female sexual partners. Given the  
13 multidirectional risk, safer sex communication on heterosexual anal intercourse must be  
14 incorporated into HIV prevention programs.  
15  
16  
17  
18  
19  
20  
21  
22  
23  
24  
25

## 26 **Article summary**

27  
28 This paper discusses the prevalence of anal intercourse, male clients' self-reported inconsistent  
29 condom use during anal intercourse with FSWs, and correlates of this behavior in Andhra  
30 Pradesh, Maharashtra and Tamil Nadu.  
31  
32  
33  
34  
35  
36  
37  
38  
39

## 40 **Key messages**

- 41  
42 • Sex workers and their clients commonly practice anal intercourse, but a relatively high  
43 proportion of clients do not consistently use condoms, resulting in a greater risk of  
44 acquiring HIV and its further transmission to other male and female sexual partners.  
45  
46  
47  
48
- 49 • Safer sex messages on heterosexual anal intercourse should be incorporated into HIV  
50 prevention interventions for both FSWs and their clients.  
51  
52  
53  
54

## 55 **Strengths and limitations of this study**

56  
57  
58  
59  
60

- Using data from a large scale multi-site bio-behavioral survey, this paper discusses the prevalence and practice of unprotected anal intercourse among clients of sex workers in three high HIV prevalence states of India.
- Both anal intercourse and condom use are self-reported measures and may therefore be influenced by the social desirability bias, resulting in under or over reporting of the phenomena.

**Keywords:** clients of female sex workers, FSW, anal intercourse, condom use, HIV, STI, India, Maharashtra, Tamil Nadu, Andhra Pradesh

**Word count: 2,814** (Introduction, methods, results and conclusion)

## Introduction

Heterosexual anal intercourse (HAI) is an understudied risk behavior among clients of female sex workers (CFSWs), a vulnerable population that has been identified as a critical bridge group in HIV transmission.<sup>1 2</sup> HAI has thus far received little attention, even though depictions of heterosexual anal intercourse can be found in art and artifacts dating to antiquity.<sup>3</sup> The silence on this front is perhaps linked to society's discomfort with HAI, coupled with the notion that anal intercourse is a homosexual male practice, not heterosexual.<sup>3 4</sup> Most HIV transmission in India occurs through heterosexual networks<sup>5 6</sup>, and unprotected, heterosexual transactional sex plays a central role in the spread of HIV.<sup>7</sup> Previous studies indicate that condom usage is higher for vaginal intercourse than for heterosexual anal sex.<sup>8 9</sup> Furthermore, studies have documented condom breakage when condoms were used during anal intercourse, thereby increasing chances of infection.<sup>10-12</sup> While behavioral interventions targeting FSWs have substantially reduced HIV prevalence in general, the FSWs' HIV and STI vulnerability remains high due to the increasing trend of risky behaviors, such as unprotected anal intercourse with clients.<sup>13 14</sup>

Given the high vulnerabilities associated with HAI in commercial and non-commercial sex settings, a few research studies have assessed anal intercourse prevalence and associated factors among FSWs and the general population.<sup>15-17</sup> Similar to findings from other countries in commercial sex settings, studies on FSWs in India have also documented increased trend for anal intercourse with clients.<sup>13 14 18</sup> Varying estimates of anal intercourse prevalence have been documented in India, ranging from 3 to 80.<sup>13 18 19</sup> In India and elsewhere, the primary reason for FSWs selling anal sex is the extra money it brings from clients. It is also linked to associated factors such as economic hardship, debt status and lack of alternate source of income.<sup>14 18</sup> Anal intercourse is usually demand driven, not preferred by FSWs and at times even forced by clients

1  
2  
3 through violence.<sup>15 18 20 21</sup> Both intervention and research in the area are extensive among FSWs.  
4  
5 However, there is paucity of behavioral research on clients' self-reported anal intercourse and  
6  
7 condom use during anal intercourse. This paper examines the correlates of clients' inconsistent  
8  
9 condom use during anal intercourse with FSWs. The study has used cross-sectional survey data  
10  
11 collected from clients of FSW in three high HIV prevalence states of India.  
12  
13

## 14 15 16 **Materials and Methods,**

### 17 18 19 *Data source*

20  
21  
22 Data were derived from a cross-sectional bio-behavioural survey (called integrated behavioral  
23  
24 and biological assessment [IBBA]) that was conducted among clients of FSWs as part of the  
25  
26 evaluation of a large-scale HIV prevention program in 12 districts across the three Indian states  
27  
28 of Andhra Pradesh, Maharashtra and Tamil Nadu during 2009–2010. Men, of ages 18–60 years,  
29  
30 who reported purchasing sex from an FSW in the past month, were considered eligible  
31  
32 respondents. These eligible respondents were identified with the help of FSWs, brokers, pimps,  
33  
34 etc., at places of FSW solicitation/entertainment and recruited for the study. The survey used a  
35  
36 two-stage cluster sampling design with time location clusters (TLCs) as primary sampling units.  
37  
38 Clusters were randomly selected by using probability proportional to size (PPS) in the first stage.  
39  
40 From these selected clusters, respondents were then selected through systematic random  
41  
42 sampling in the second stage. Behavioral information was collected through a structured,  
43  
44 interviewer-administered questionnaire, and blood and urine samples were collected to test for  
45  
46 HIV and other STIs (gonorrhoea, chlamydia, syphilis). A detailed description of the survey  
47  
48 methodology is available elsewhere.<sup>22</sup>  
49  
50  
51  
52  
53  
54  
55  
56  
57  
58  
59  
60



Prior oral or written informed consent was obtained from all respondents. The survey was approved by the ethics committees of the participating institutes of Indian Council of Medical Research (National AIDS Research Institute, Pune; National Institute of Nutrition, Hyderabad; and National Institute of Epidemiology, Chennai) and FHI 360 (Protection of Human Subjects Committee).

### *Conceptual framework*

For the current analysis, a conceptual framework (Figure 1, illustrated below) was used as a device to explain and identify the different factors that may be associated with inconsistent condom use during anal intercourse with FSWs.

**Figure 1:** Conceptual framework of factors related with inconsistent condom use during anal intercourse

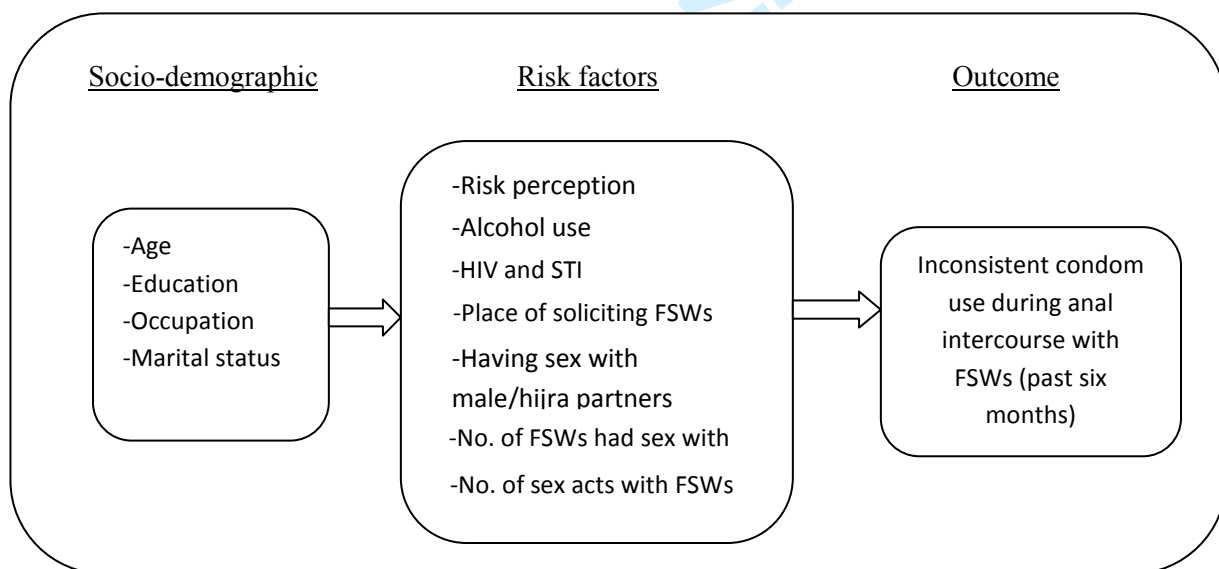

Inconsistent condom use during anal intercourse was the dependent variable. The independent variables were selected based on their contextual relation with the dependent variable. Based on

1  
2  
3 prior research, individual factors such as risk perception, alcohol use,<sup>23-25</sup> frequency of  
4 commercial sex, volume of sex acts,<sup>14 26</sup> having male/transgender partners,<sup>27</sup> place of soliciting  
5 FSWs<sup>5</sup> and having HIV/STIs,<sup>18</sup> which are widely seen to influence condom use among different  
6 high-risk population groups, were included. We hypothesized that clients who were married,  
7 consumed alcohol, solicited FSWs from public places and had a higher number of FSW partners  
8 were more likely to be inconsistent condom users. These clients were also more likely to have  
9 experienced anal sex with a man. Most current interventions for clients of FSWs are limited to  
10 condom promotion and distribution, and no intervention for FSWs or their clients currently  
11 addresses heterosexual anal intercourse, which has significant implications for HIV prevention  
12 programming.

13  
14  
15  
16  
17  
18  
19  
20  
21  
22  
23  
24  
25  
26  
27  
28 Based on the rationale described above, we grouped the different indicators into two categories:

29 a) socio-demographic and b) HIV-related sexual risk behaviors.

### 30 31 32 33 **Measures**

#### 34 35 36 *Dependent variable:*

37  
38  
39  
40 Inconsistent condom use during anal intercourse - This behavior was assessed by asking: “How  
41 often did you use a condom while having anal intercourse with your regular and occasional  
42 FSWs in the past six months?” The clients who reported using condoms most of the time,  
43 sometimes or never were considered inconsistent condom users (coded as ‘1’), while those who  
44 reported using condoms every time during anal intercourse were considered consistent condom  
45 users (coded as ‘0’).

1  
2  
3  
4  
5  
6  
7  
8  
9  
10  
11  
12  
13  
14  
15  
16  
17  
18  
19  
20  
21  
22  
23  
24  
25  
26  
27  
28  
29  
30  
31  
32  
33  
34  
35  
36  
37  
38  
39  
40  
41  
42  
43  
44  
45  
46  
47  
48  
49  
50  
51  
52  
53  
54  
55  
56  
57  
58  
59  
60

*Independent variables:*

The independent variables included age in completed years; education (illiterate, can read only, can read and write); occupation (pre-coded as unemployed, student, domestic servant, agricultural labor, non-agricultural/casual labor, skilled/semi-skilled labor, petty businessman/shop owner, large businessman/shop owner, bus/truck drivers/helpers, other transport workers, service and others); marital status (currently married, separated, divorced, widowed, never married, no answer); place of soliciting FSWs (pre-coded as bar/night club, public place, street, park, railway station, agent, brothel, hotel/lodge, home, *dhaba*, by telephone, other); number of FSWs had sex with in the past month; number of sex acts with FSWs in the past month; ever had anal intercourse with a man/transgender (yes/no); self-risk perception (yes/no); alcohol consumption (everyday, at least once a week, less than once a week, never, no answer); and having HIV or any STI (those having HIV, syphilis, gonorrhoea or chlamydia were grouped into positive and the rest as negative).

Given the skewed distribution, all the variables were dichotomized for the analysis. Age was categorized into  $\leq 25$  years and 26 years or older; education was grouped into literate and illiterate; occupation into laborers (manual) and non-laborers, marital status as currently married and never married/widowed/separated/divorced; place of soliciting FSWs into public place and non-public place; number of FSWs had sex with as  $\leq 3$  FSWs and  $\geq 4$  FSWs; number of sex acts as  $\leq 4$  times and  $\geq 5$  times; and alcohol use into frequent and infrequent drinkers.

*Statistical analysis*

Descriptive statistics were calculated and used to measure the levels of inconsistent condom use (during anal intercourse) and other selected variables. Chi-square tests were used to assess the

1  
2  
3 significance of bivariate relationships between demographic characteristics of clients and their  
4 condom use behaviour during anal intercourse. Multiple logistic regression model was used to  
5  
6 identify factors that were independently predictive of inconsistent condom use during anal  
7  
8 intercourse, with adjusted odds ratio calculated at a significance level less than 0.05. Statistical  
9  
10 calculations were conducted using aggregated data of clients of FSWs from all three states, since  
11  
12 the eligibility criteria for respondents and the methods of sampling and behavioural data  
13  
14 collection were standardized and same in all the three states. Analysis was done by applying  
15  
16 appropriate weights. At the district level, weighting was based on the cluster effect of the sample.  
17  
18 At the aggregate level, standardized weights were calculated by combining the 12 districts.  
19  
20 STATA/SE version 11® (Stata Corporation, College Station, TX) was used for all the analyses.  
21  
22  
23  
24  
25  
26  
27

## 28 **Results**

29  
30  
31 Of the 4,803 clients of FSWs (Andhra Pradesh (n=2016), Tamil Nadu (n=1217), and  
32  
33 Maharashtra (n=1570), 12.4% reported having had anal intercourse in the past six months; 48.4%  
34  
35 among them used condoms inconsistently during anal intercourse. As presented in Table 1, the  
36  
37 bivariate analysis shows that the majority of inconsistent condom users were ages 26 years or  
38  
39 older (84.3%), married (79.8 %) and solicited FSWs from public places (77.1 %). Literacy levels  
40  
41 were lower among inconsistent condom users than among consistent condom users (50.0 % vs.  
42  
43 85.2 %, p=0.003). Similarly, a lower proportion of inconsistent condom users reported having  
44  
45 had anal intercourse with a man than consistent condom users (18.7 % vs. 39.4 %, p=0.022). A  
46  
47 higher proportion of inconsistent condom users consumed alcohol frequently (56.0 % vs. 37.5%,  
48  
49 p=0.031) and considered themselves at risk of exposure to HIV than consistent condom users  
50  
51 (47.9 % vs. 7.13 %, p=0.000). More than 30 % inconsistent condom users tested positive for  
52  
53  
54  
55  
56  
57  
58  
59  
60

1  
2  
3 HIV/STI, compared to a smaller proportion of consistent condom users (32.3 % vs. 9.7 %,  
4  
5 p=0.085), but the association is not significant.  
6  
7

8  
9 Table 2 shows the independent factors associated with inconsistent condom use during anal  
10  
11 intercourse with FSWs. Clients of FSWs who were ages 26 years or older (AOR: 2.68, p=0.032),  
12  
13 employed as manual laborers (AOR: 2.43, p=0.013), consumed alcohol (AOR: 2.63, p=0.001),  
14  
15 reported five or more sex acts with FSWs in the past month (AOR: 2.53, p=0.031), and perceived  
16  
17 themselves to be at higher risk for HIV (AOR: 4.82, p=0.001) were more likely to inconsistently  
18  
19 use condoms during anal intercourse than their counterparts. On the other hand, clients who were  
20  
21 currently married (AOR: 0.41, p=0.056) and had sex with more number of FSWs ( $\geq 4$  and above)  
22  
23 in the past month were less likely to inconsistently use condoms during anal intercourse than  
24  
25 those never married/separated/divorced/widowed and who had sex with less than three FSWs.  
26  
27 Testing positive for HIV or STI was not found to be associated with inconsistency in condom use  
28  
29 during anal intercourse. Similarly, factors such as literacy level, place where the client solicited  
30  
31 FSWs and whether he had had anal sex with a male/hijra partner were not associated with  
32  
33 inconsistency in condom use during anal intercourse.  
34  
35  
36  
37  
38  
39

## 40 **Discussion**

41  
42  
43 IBBA, one of the few surveys in India to study large samples of clients of FSWs, has  
44  
45 documented the practice of unprotected anal intercourse in three high HIV prevalence states of  
46  
47 the country. Its findings show that anal intercourse is a substantial part of the commercial sex  
48  
49 activity in India, with about 12 percent clients reporting experience of anal intercourse and  
50  
51 nearly half of them not using condoms during anal intercourse with FSWs. Our study suggests  
52  
53 that the profile of clients who have unprotected anal intercourse varies from other clients. Clients  
54  
55  
56  
57  
58  
59  
60

1  
2  
3 who were 26 years or older, frequently used alcohol, worked as manual laborers and reported  
4  
5 higher number of sex acts with FSWs were at an increased risk of unprotected anal intercourse.  
6  
7

8  
9 In the absence of comparable estimates on anal intercourse from client surveys in India, we  
10  
11 examined the estimates available from studies on FSWs.<sup>13 14 18</sup> It was apparent that there is a high  
12  
13 demand for anal sex. When compared with the prevalence reported by previous FSW studies, the  
14  
15 prevalence estimated by our study seems to be much lower, possibly due to the social desirability  
16  
17 bias, which was not measured and is a major limitation for self-reported measures.  
18  
19

20  
21 The finding that older clients are at a higher risk of inconsistent condom use has been reported  
22  
23 previously. A study by Subramanian T et.al., found inconsistent condom use during vaginal  
24  
25 intercourse with FSWs to be significantly associated with older clients.<sup>2</sup> The average age of  
26  
27 marriage for Indian men is documented to be 26 years, and a majority of men (clients of FSWs)  
28  
29 in this sample were married. A possible explanation for this risky behavior among older men  
30  
31 could be the need to fulfill sexual desires or experimentation, followed by the belief that paying  
32  
33 for sex would be less troublesome and more entertaining than sexual involvement with a non-sex  
34  
35 worker.<sup>28</sup> Older men who have sex with men have also been found to practice risky sexual  
36  
37 behavior like inconsistent condom use.<sup>29</sup>  
38  
39  
40  
41  
42

43 Likewise, clients who were manual laborers were more likely to be inconsistent condom users,  
44  
45 compared to those in other occupations (white collar workers). The manual laborers in the  
46  
47 current study include agricultural and non-agricultural laborers and cultivators. It is possible that  
48  
49 many of these men migrated for work and stay away from their families. Additional analysis was  
50  
51 undertaken to understand this dimension better; more than 50 % respondents reported travelling  
52  
53 in the past one year, primarily for work. These men also reported buying sex from FSWs. Given  
54  
55 this scenario, it is imperative that tailored interventions be designed for those involved in manual  
56  
57  
58  
59  
60

1  
2  
3 labor, who are often difficult to engage in prevention programs. These men could be captured  
4 through networks of labor contractors and migrant populations. Educational campaigns and  
5  
6 counseling are also important to promote condom use for all partners and all types of sex.  
7  
8

9  
10 Our study also found that clients with higher self-perceived risk for HIV were more likely to be  
11 inconsistent condom users. Such an association could be attributed to the fact that knowledge  
12 and perceptions about safe or risky sex may not be sufficient to change an individual's behavior  
13 until self-efficacy and determination in executing a behavior or action are present.<sup>30</sup> Studies that  
14 have used the self-efficacy model among heterosexually active students have documented that  
15 risk perceptions have no influence over condom use, as was noted in this study.<sup>8 31</sup> Another  
16 plausible reason could be the lack of targeted interventions for clients, which, if present, could  
17 have inculcated a sense of responsibility toward their sexual partners.  
18  
19

20 Men who consume alcohol have been found more likely to engage in unprotected sex and anal  
21 sex and have more than 10 FSW partners.<sup>32</sup> A similar association was observed in our study,  
22 where clients who consumed alcohol frequently and reported five or more sexual encounters  
23 were found to inconsistently use condoms during anal intercourse. It seems that the survey has  
24 been able to capture high-risk clients, who have higher volume of sex acts with FSWs, engage in  
25 anal intercourse and do not use condoms. Alcohol use and its association with HIV-related  
26 sexual risk is well documented.<sup>32-34</sup> HIV prevention interventions must address this important  
27 issue linked with compromise in safe sex practices/behavior. There is a clear need for HIV  
28 prevention interventions tailored to provide information on alcohol related sexual risk.  
29

30 Although studies from the early 1990s have highlighted anal intercourse as a risk factor for  
31 HIV,<sup>9 35</sup> most AIDS prevention messages targeting heterosexuals continue to focus only on  
32 vaginal and oral sex transmission. Cultural taboos have possibly played a major role against  
33  
34  
35  
36  
37  
38  
39  
40  
41  
42  
43  
44  
45  
46  
47  
48  
49  
50  
51

1  
2  
3 acknowledging anal sexual practice. Research on vulnerable populations, including FSWs and  
4 youth, indicate that the persons particularly at risk of being infected by or transmitting HIV are  
5 more likely to practice anal intercourse.<sup>36</sup> Furthermore, people with experience in anal  
6 intercourse have been found to take more sexual risk when engaging in vaginal intercourse than  
7 those without anal experience.<sup>8</sup>

### 14 15 16 **Limitations of the study**

17  
18 Our study has its limitations. For one, both anal intercourse and condom use are self-reported  
19 measures and may, therefore, be influenced by the social desirability bias. As indicated by  
20 previous research, the social desirability bias gives rise to the possibility of underreporting.  
21 Given the difficulty in evaluating the magnitude of underreporting, we must be cautious in  
22 concluding that anal intercourse is practiced at relatively low rates among this population.  
23 Another limitation is that we did not have information on anal intercourse with regular female  
24 partners to establish concurrency or multidirectional risk during anal intercourse. Future studies  
25 need to address these gaps. In addition, qualitative studies are needed to better understand the  
26 context in which anal intercourse occurs. In spite of these limitations, this is one of the first  
27 studies to document for the clients of FSWs the practice of anal intercourse and the correlates of  
28 condom use during anal intercourse.

### 30 31 32 33 34 35 36 37 38 39 40 41 42 43 44 45 46 **Conclusions**

47  
48 The study indicates that HIV prevention programs targeting FSWs and their clients must  
49 highlight the increased risk unprotected anal intercourse poses for both self and partners.  
50 Condoms and water-based lubricants need to be marketed to reduce these risks. Given the  
51 multidirectional risk, condom promotion programs must be extended to include specific  
52  
53  
54  
55  
56  
57  
58  
59  
60



1  
2  
3 information on the benefits of consistent condom use while engaging in anal and other types of  
4 sex. Safer sex messages addressing heterosexual anal intercourse need to be incorporated into  
5 HIV prevention interventions for both FSWs and their clients. Current prevention programs fail  
6 to address this issue. Greater emphasis in AIDS/STI prevention must be given to this typically  
7 stigmatized and underreported sexual practice.  
8  
9  
10  
11  
12  
13

### 14 15 16 17 18 **Acknowledgement** 19

20  
21 The authors wish to thank the Avahan state implementation partners for their partnership in this  
22 study. We thank Dr. Stephen Schensul, Dr. Niranjana Saggurti and Dr. Bidhu Bhushan Mahapatra  
23 for providing critical inputs during concept development and analysis. We also extend our  
24 gratitude to Dr. Steve Mills from FHI 360, Asia Pacific Regional Office, Bangkok, Thailand, for  
25 his inputs in the finalization of this manuscript. Finally, we thank the respondents for their  
26 participation in the study.  
27  
28  
29  
30  
31  
32  
33  
34

35  
36 An earlier version (abstract) of this research paper was presented at the STI & AIDS World  
37 Congress 2013 in Vienna, Austria.  
38  
39  
40  
41  
42  
43  
44  
45  
46  
47  
48  
49  
50  
51  
52  
53  
54  
55  
56  
57  
58  
59  
60

## Contributors

SR and KN contributed to concept development, data analysis and interpretation, and writing and finalization of the manuscript. LR, PG, DY, SS, BG, HR, TS, and RSP contributed to concept design, review and finalization of the manuscript.

## Funding

The Bill & Melinda Gates Foundation funded this research through Avahan: the India AIDS Initiative. The views expressed herein are those of the authors and do not necessarily reflect the official policy or position of the foundation and Avahan.

## Competing interests

None declared

## Ethics approval

Clearance for the study was taken from the Protection of Human Subjects Committee (PHSC), FHI360 HQ, Washington DC, and Health Ministry Screening Committee (HMSC), Government of India.

## Data sharing statement

IBBA Round 1 and Round 2 data are available at:

<http://www.nari-icmr.res.in/IBBAdataaccess.php>

Other IBBA-related documents are available at:

[www.ibbainfo.in](http://www.ibbainfo.in)

**Table 1: Characteristics of clients of FSWs who reported anal intercourse (past six months) and condom use**

| Characteristics                                                 | Consistent users<br>(n=397)<br>% (number) | Inconsistent users<br>(n=280)<br>% (number) | p-value |
|-----------------------------------------------------------------|-------------------------------------------|---------------------------------------------|---------|
| Age                                                             |                                           |                                             |         |
| ≤25 years                                                       | 27.1 (117)                                | 15.6 (53)                                   | 0.165   |
| 26 years or older                                               | 72.8 (280)                                | 84.3 (227)                                  |         |
| Education                                                       |                                           |                                             |         |
| Illiterate                                                      | 14.8 (64)                                 | 49.9 (57)                                   | 0.003   |
| Literate                                                        | 85.2 (333)                                | 50.0 (223)                                  |         |
| Marital status                                                  |                                           |                                             |         |
| Never married/widowed/separated/divorced                        | 29.8 (120)                                | 20.11 (84)                                  | 0.266   |
| Currently married                                               | 70.1 (277)                                | 79.8 (196)                                  |         |
| Occupation                                                      |                                           |                                             |         |
| Non-laborer (students/business/service)                         | 51.4 (214)                                | 46.1 (90)                                   | 0.749   |
| Manual laborer (agricultural/non-agricultural labor/cultivator) | 48.5 (181)                                | 53.8 (190)                                  |         |
| Place solicited FSWs                                            |                                           |                                             |         |
| Non-public place (brothel/home/lodge/dhaba)                     | 30.6 (117)                                | 22.9 (93)                                   | 0.448   |
| Public place                                                    | 69.3 (278)                                | 77.1 (186)                                  |         |
| No. of FSWs had sex with in the past one month                  |                                           |                                             |         |
| ≤3 FSWs                                                         | 72.3 (324)                                | 86.4 (229)                                  | 0.088   |
| ≥4 FSWs and above                                               | 27.6 (73)                                 | 13.5 (51)                                   |         |
| No. of sex acts with FSWs in the past one month                 |                                           |                                             |         |
| ≤4 times                                                        | 73.7 (285)                                | 76.0 (184)                                  | 0.812   |
| ≥5 and above                                                    | 26.2 (111)                                | 23.9 (95)                                   |         |
| Perceive to be at high risk of exposure to HIV                  |                                           |                                             |         |
| No                                                              | 92.8 (337)                                | 52.0 (188)                                  | 0.000   |
| Yes                                                             | 7.13 (39)                                 | 47.9 (82)                                   |         |
| Alcohol user                                                    |                                           |                                             |         |
| Infrequent drinker                                              | 62.4 (262)                                | 43.9 (142)                                  | 0.031   |
| Frequent drinker (everyday)                                     | 37.5 (116)                                | 56.0 (121)                                  |         |
| Ever had anal intercourse with a man/hijra                      |                                           |                                             |         |
| No                                                              | 60.5 (311)                                | 81.2 (179)                                  | 0.022   |
| Yes                                                             | 39.4 (86)                                 | 18.7 (101)                                  |         |
| Any HIV/STIs                                                    |                                           |                                             |         |
| Negative                                                        | 90.2 (367)                                | 67.6 (253)                                  | 0.085   |
| Positive                                                        | 9.7 (30)                                  | 32.3 (27)                                   |         |

**Table 2: Independent factors associated with inconsistent condom use during anal intercourse with FSWs in multivariate analysis**

| Characteristics                                                 | Adjusted odds ratio<br>(95% CI) | p-value |
|-----------------------------------------------------------------|---------------------------------|---------|
| Age                                                             |                                 |         |
| ≤25 years                                                       | Referent                        |         |
| 26 years or older                                               | 2.68 (1.09-6.61)                | 0.032   |
| Education                                                       |                                 |         |
| Illiterate                                                      | Referent                        |         |
| Literate                                                        | 0.66 (0.28-1.56)                | 0.347   |
| Occupation                                                      |                                 |         |
| Non-laborer (student/business/service)                          | Referent                        |         |
| Manual laborer (agricultural/non-agricultural labor/cultivator) | 2.43 (1.21-4.90)                | 0.013   |
| Marital status                                                  |                                 |         |
| Never married/widowed/separated /divorced                       | Referent                        |         |
| Currently married                                               | 0.32 (0.13-0.80)                | 0.015   |
| Place solicited FSWs                                            |                                 |         |
| Non-public place (brothel/home/lodge/dhaba)                     | Referent                        |         |
| Public place                                                    | 1.26 (0.60-2.61)                | 0.533   |
| No. of FSWs had sex with in the past one month                  |                                 |         |
| ≤3 FSWs                                                         | Referent                        |         |
| ≥ 4 FSWs and above                                              | 0.29 (0.10-0.84)                | 0.022   |
| No. of sex acts with FSWs in the past one month                 |                                 |         |
| ≤ 4 times                                                       | Referent                        |         |
| ≥ 5 and above                                                   | 2.53 (0.09-5.90)                | 0.031   |
| Perceive to be at high risk of exposure to HIV                  |                                 |         |
| No                                                              | Referent                        |         |
| Yes                                                             | 4.82 (1.91-12.14)               | 0.001   |
| Alcohol user                                                    |                                 |         |
| Infrequent drinker                                              | Referent                        |         |
| Frequent drinker (everyday)                                     | 2.63 (1.46-4.71)                | 0.001   |
| Ever had anal intercourse with a man/hijra                      |                                 |         |
| No                                                              | Referent                        |         |
| Yes                                                             | 0.76 (0.39-1.50)                | 0.440   |
| Any HIV/STIs                                                    |                                 |         |
| Negative                                                        | Referent                        |         |
| Positive                                                        | 0.73 (0.25-2.12)                | 0.568   |

## References:

1. National AIDS Control Organisation MoHaFW, Government of India. 2006. New Delhi, National Behavioural Surveillance Survey (BSS)-Female Sex Workers (FSWs) and their Clients.
2. Subramanian T, Gupte MD, Paranjape RS, et al. HIV, sexually transmitted infections and sexual behaviour of male clients of female sex workers in Andhra Pradesh, Tamil Nadu and Maharashtra, India: results of a cross-sectional survey. *AIDS* 2008 **22** ( 5):S69-79. .
3. McBride KR, Fortenberry JD. Heterosexual anal sexuality and anal sex behaviors: a review. *Journal of sex research* 2010;**47**(2):123-36.
4. Voeller B. AIDS and heterosexual anal intercourse. (0004-0002 (Print)).
5. Suryawanshi D, Bhatnagar T, Deshpande S, et al. Diversity among Clients of Female Sex Workers in India: Comparing Risk Profiles and Intervention Impact by Site of Solicitation. Implications for the Vulnerability of Less Visible Female Sex Workers. *PloS one* 2013;**8**(9):e73470.
6. National AIDS Control Organisation MoHaFW, Government of India. HIV Sentinel Surveillance 2010-11: A Technical Brief. New Delhi, 2012.
7. Samet JH, Pace CA, Cheng DM, et al. Alcohol use and sex risk behaviors among HIV-infected female sex workers (FSWs) and HIV-infected male clients of FSWs in India. *AIDS Behav* 2010;**14** (1):S74-83.
8. Baldwin JI, Baldwin JD. Heterosexual anal intercourse: an understudied, high-risk sexual behavior. *Archives of sexual behavior* 2000;**29**(4):357-73.
9. Halperin DT. Heterosexual anal intercourse: prevalence, cultural factors, and HIV infection and other health risks, Part I. *AIDS patient care and STDs* 1999;**13**(12):717-30.
10. Bradley J, Rajaram S, Moses S, et al. Female sex worker client behaviors lead to condom breakage: a prospective telephone-based survey in Bangalore, South India. *AIDS and behavior* 2013;**17**(2):559-67.
11. Priddy FH, Wakasiaka S, Hoang TD, et al. Anal sex, vaginal practices, and HIV incidence in female sex workers in urban Kenya: implications for the development of intravaginal HIV prevention methods. *AIDS research and human retroviruses* 2011;**27**(10):1067-72.
12. Bradley J, Rajaram S, Alary M, et al. Determinants of condom breakage among female sex workers in Karnataka, India. *BMC public health* 2011;**11 Suppl 6**:S14.
13. Beattie TS, Bradley JE, Vanta UD, et al. Vulnerability re-assessed: the changing face of sex work in Guntur district, Andhra Pradesh. *AIDS care* 2013;**25**(3):378-84.
14. Tucker S, Krishna R, Prabhakar P, et al. Exploring dynamics of anal sex among female sex workers in Andhra Pradesh. *Indian journal of sexually transmitted diseases* 2012;**33**(1):9-15.
15. Schwandt M Fau - Morris C, Morris C Fau - Ferguson A, Ferguson A Fau - Ngugi E, et al. Anal and dry sex in commercial sex work, and relation to risk for sexually transmitted infections and HIV in Meru, Kenya. *Sex Transm Infect* 2006 (1368-4973 (Print)).
16. Heywood W, Smith AM. Anal sex practices in heterosexual and male homosexual populations: a review of population-based data. *Sexual health* 2012;**9**(6):517-26.
17. Veldhuijzen NJ IC, Luchters S, Bosire W, Braunstein S, Chersich M, van de Wijgert J. Anal intercourse among female sex workers in East Africa is associated with other high-risk behaviours for HIV. *Sex Health* 2011 **8**(2):251-4.
18. Patra RK, Mahapatra B, Kovvali D, et al. Anal sex and associated HIV-related sexual risk factors among female sex workers in Andhra Pradesh, India. *Sexual health* 2012;**9**(5):430-7.
19. M. A. A Blind Spot in HIV prevention-Female Anal Sex.
20. Allen B, Cruz-Valdez A, Rivera-Rivera L, et al. [Affection, kisses, and condoms: the ABC of sexual practices of female sex workers in Mexico City]. *Salud publica de Mexico* 2003;**45 Supp 5**:S594-607.

- 1
  - 2
  - 3
  - 4
  - 5
  - 6
  - 7
  - 8
  - 9
  - 10
  - 11
  - 12
  - 13
  - 14
  - 15
  - 16
  - 17
  - 18
  - 19
  - 20
  - 21
  - 22
  - 23
  - 24
  - 25
  - 26
  - 27
  - 28
  - 29
  - 30
  - 31
  - 32
  - 33
  - 34
  - 35
  - 36
  - 37
  - 38
  - 39
  - 40
  - 41
  - 42
  - 43
  - 44
  - 45
  - 46
  - 47
  - 48
  - 49
  - 50
  - 51
  - 52
  - 53
  - 54
  - 55
  - 56
  - 57
  - 58
  - 59
  - 60
21. Decker Mr Fau - McCauley HL, McCauley HI Fau - Phuengsamran D, Phuengsamran D Fau - Janyam S, et al. Violence victimisation, sexual risk and sexually transmitted infection symptoms among female sex workers in Thailand. (1472-3263 (Electronic)).
22. Saidel T, Adhikary R, Mainkar M, et al. Baseline integrated behavioural and biological assessment among most at-risk populations in six high-prevalence states of India: design and implementation challenges. *AIDS (London, England)* 2008;**22**:S17-S34  
10.1097/01.aids.0000343761.77702.04.
23. Myers T, Rowe CJ, Tudiver FG, et al. HIV, substance use and related behaviour of gay and bisexual men: an examination of the talking sex project cohort. *British journal of addiction* 1992;**87**(2):207-14.
24. Mimiaga MJ, Thomas B, Mayer KH, et al. Alcohol use and HIV sexual risk among MSM in Chennai, India. *International journal of STD & AIDS* 2011;**22**(3):121-5.
25. Greene E, Frye V, Mansergh G, et al. Correlates of unprotected vaginal or anal intercourse with women among substance-using men who have sex with men. *AIDS and behavior* 2013;**17**(3):889-99.
26. Mahapatra B, Lowndes CM, Mohanty SK, et al. Factors associated with risky sexual practices among female sex workers in Karnataka, India. *PloS one* 2013;**8**(4):e62167.
27. Grov C, Wolff M, Smith MD, et al. Male Clients of Male Escorts: Satisfaction, Sexual Behavior, and Demographic Characteristics. *Journal of sex research* 2013.
28. Pitts MK, Smith Am Fau - Grierson J, Grierson J Fau - O'Brien M, et al. Who pays for sex and why? An analysis of social and motivational factors associated with male clients of sex workers. (0004-0002 (Print)).
29. Ramanathan S, Chakrapani V, Ramakrishnan L, et al. Consistent condom use with regular, paying, and casual male partners and associated factors among men who have sex with men in Tamil Nadu, India: findings from an assessment of a large-scale HIV prevention program. *BMC public health* 2013;**13**(1):827.
30. Bandura A. Perceived self-efficacy in the exercise of control over AIDS infection. *Evaluation and Program Planning* 1990;**13**(1):9-17.
31. Wulfert E WC. Condom use: a self-efficacy model. *Health Psychol* 1993 **12**(5):346-53.
32. Madhivanan P HA, Gogate A, Stein E, Gregorich S, Setia M, Kumta S, Ekstrand M, Mathur M, Jerajani H, Lindan CP. Alcohol use by men is a risk factor for the acquisition of sexually transmitted infections and human immunodeficiency virus from female sex workers in Mumbai, India. *Sexually transmitted diseases* 2005;**32**(11):685-90.
33. Schensul J, Singh SK, Gupta K, et al. Alcohol and HIV in India: A Review of Current Research and Intervention. *AIDS and behavior* 2010;**14**(1):1-7.
34. Mimiaga MJ, Thomas B, Mayer KH, et al. Alcohol use and HIV sexual risk among MSM in Chennai, India. *International journal of STD & AIDS* 2011;**22**(3):121-25.
35. Erickson PI, Bastani R, Maxwell AE, et al. Prevalence of anal sex among heterosexuals in California and its relationship to other AIDS risk behaviors. *AIDS education and prevention : official publication of the International Society for AIDS Education* 1995;**7**(6):477-93.
36. Stulhofer A, Bacak V. Is anal sex a marker for sexual risk-taking? Results from a population-based study of young Croatian adults. *Sexual health* 2011;**8**(3):384-9.

STROBE 2007 (v4) Statement—Checklist of items that should be included in reports of *cross-sectional studies*

| Section/Topic                | Item # | Recommendation                                                                                                                                                                       | Reported on page # |
|------------------------------|--------|--------------------------------------------------------------------------------------------------------------------------------------------------------------------------------------|--------------------|
| Title and abstract           | 1      | (a) Indicate the study's design with a commonly used term in the title or the abstract                                                                                               | 3                  |
|                              |        | (b) Provide in the abstract an informative and balanced summary of what was done and what was found                                                                                  | 3-4                |
| <b>Introduction</b>          |        |                                                                                                                                                                                      |                    |
| Background/rationale         | 2      | Explain the scientific background and rationale for the investigation being reported                                                                                                 | 6                  |
| Objectives                   | 3      | State specific objectives, including any pre-specified hypotheses                                                                                                                    | 7,9                |
| <b>Methods</b>               |        |                                                                                                                                                                                      |                    |
| Study design                 | 4      | Present key elements of study design early in the paper                                                                                                                              | 7,8,9              |
| Setting                      | 5      | Describe the setting, locations, and relevant dates, including periods of recruitment, exposure, follow-up, and data collection                                                      | 7,8                |
| Participants                 | 6      | (a) Give the eligibility criteria, and the sources and methods of selection of participants                                                                                          | 7,8                |
| Variables                    | 7      | Clearly define all outcomes, exposures, predictors, potential confounders, and effect modifiers. Give diagnostic criteria, if applicable                                             | 9,10               |
| Data sources/<br>measurement | 8*     | For each variable of interest, give sources of data and details of methods of assessment (measurement). Describe comparability of assessment methods if there is more than one group | 9,10               |
| Bias                         | 9      | Describe any efforts to address potential sources of bias                                                                                                                            | -                  |
| Study size                   | 10     | Explain how the study size was arrived at                                                                                                                                            | -                  |
| Quantitative variables       | 11     | Explain how quantitative variables were handled in the analyses. If applicable, describe which groupings were chosen and why                                                         | 10,11              |
| Statistical methods          | 12     | (a) Describe all statistical methods, including those used to control for confounding                                                                                                | 10,11              |
|                              |        | (b) Describe any methods used to examine subgroups and interactions                                                                                                                  | -                  |
|                              |        | (c) Explain how missing data were addressed                                                                                                                                          | -                  |
|                              |        | (d) If applicable, describe analytical methods taking account of sampling strategy                                                                                                   | -                  |
|                              |        | (e) Describe any sensitivity analyses                                                                                                                                                | -                  |
| <b>Results</b>               |        |                                                                                                                                                                                      |                    |

|                          |     |                                                                                                                                                                                                              |        |
|--------------------------|-----|--------------------------------------------------------------------------------------------------------------------------------------------------------------------------------------------------------------|--------|
| Participants             | 13* | (a) Report numbers of individuals at each stage of study—eg numbers potentially eligible, examined for eligibility, confirmed eligible, included in the study, completing follow-up, and analysed            | 11, 12 |
|                          |     | (b) Give reasons for non-participation at each stage                                                                                                                                                         | -      |
|                          |     | (c) Consider use of a flow diagram                                                                                                                                                                           | -      |
| Descriptive data         | 14* | (a) Give characteristics of study participants (eg demographic, clinical, social) and information on exposures and potential confounders                                                                     | 11, 12 |
|                          |     | (b) Indicate number of participants with missing data for each variable of interest                                                                                                                          | -      |
| Outcome data             | 15* | Report numbers of outcome events or summary measures                                                                                                                                                         | 11, 12 |
| Main results             | 16  | (a) Give unadjusted estimates and, if applicable, confounder-adjusted estimates and their precision (eg, 95% confidence interval). Make clear which confounders were adjusted for and why they were included | 11, 12 |
|                          |     | (b) Report category boundaries when continuous variables were categorized                                                                                                                                    | -      |
|                          |     | (c) If relevant, consider translating estimates of relative risk into absolute risk for a meaningful time period                                                                                             | -      |
| Other analyses           | 17  | Report other analyses done—eg analyses of subgroups and interactions, and sensitivity analyses                                                                                                               | -      |
| <b>Discussion</b>        |     |                                                                                                                                                                                                              |        |
| Key results              | 18  | Summarise key results with reference to study objectives                                                                                                                                                     | 12, 13 |
| Limitations              | 19  | Discuss limitations of the study, taking into account sources of potential bias or imprecision. Discuss both direction and magnitude of any potential bias                                                   | 15     |
| Interpretation           | 20  | Give a cautious overall interpretation of results considering objectives, limitations, multiplicity of analyses, results from similar studies, and other relevant evidence                                   | 15, 16 |
| Generalisability         | 21  | Discuss the generalisability (external validity) of the study results                                                                                                                                        | 15, 16 |
| <b>Other information</b> |     |                                                                                                                                                                                                              |        |
| Funding                  | 22  | Give the source of funding and the role of the funders for the present study and, if applicable, for the original study on which the present article is based                                                | 17     |

\*Give information separately for cases and controls in case-control studies and, if applicable, for exposed and unexposed groups in cohort and cross-sectional studies.

**Note:** An Explanation and Elaboration article discusses each checklist item and gives methodological background and published examples of transparent reporting. The STROBE checklist is best used in conjunction with this article (freely available on the Web sites of PLoS Medicine at <http://www.plosmedicine.org/>, Annals of Internal Medicine at <http://www.annals.org/>, and Epidemiology at <http://www.epidem.com/>). Information on the STROBE Initiative is available at [www.strobe-statement.org](http://www.strobe-statement.org).



# BMJ Open

## Inconsistent condom use by male clients during anal intercourse with female sex workers (FSWs): Survey findings from three high-prevalence states of India

|                                 |                                                                                                                                                                                                                                                                                                                                                                                                                                                                                                                                                                                                                                                                                           |
|---------------------------------|-------------------------------------------------------------------------------------------------------------------------------------------------------------------------------------------------------------------------------------------------------------------------------------------------------------------------------------------------------------------------------------------------------------------------------------------------------------------------------------------------------------------------------------------------------------------------------------------------------------------------------------------------------------------------------------------|
| Journal:                        | <i>BMJ Open</i>                                                                                                                                                                                                                                                                                                                                                                                                                                                                                                                                                                                                                                                                           |
| Manuscript ID:                  | bmjopen-2014-005166.R1                                                                                                                                                                                                                                                                                                                                                                                                                                                                                                                                                                                                                                                                    |
| Article Type:                   | Research                                                                                                                                                                                                                                                                                                                                                                                                                                                                                                                                                                                                                                                                                  |
| Date Submitted by the Author:   | 01-Aug-2014                                                                                                                                                                                                                                                                                                                                                                                                                                                                                                                                                                                                                                                                               |
| Complete List of Authors:       | Ramanathan, Shreena; FHI 360, M&E, Knowledge Network, DAKSH Nagarajan, Karikalan; National AIDS Research Institute, Knowledge Network<br>Ramakrishnan, Lakshmi; FHI 360, M&E, Knowledge Network<br>Mainkar, Mandar; Formerly with National AIDS Research Institute, Goswami, Prabuddhagopal; FHI 360, M&E<br>Yadav, Diwakar; Formerly with FHI 360, M&E<br>Sen, Shrabanti; FHI 360, M&E<br>George, Bitra; FHI 360, Country Director<br>Rachakulla, Hari; National Institute of Nutrition (NIN), Community Studies<br>Subramanian, Thilakavath; National Institute of Epidemiology (NIE), Social & Behavioural Sciences<br>Paranjape, Ramesh; National AIDS Research Institute, Immunology |
| <b>Primary Subject Heading</b>: | HIV/AIDS                                                                                                                                                                                                                                                                                                                                                                                                                                                                                                                                                                                                                                                                                  |
| Secondary Subject Heading:      | Public health                                                                                                                                                                                                                                                                                                                                                                                                                                                                                                                                                                                                                                                                             |
| Keywords:                       | Clients of sex workers, HIV/AIDS, Anal intercourse                                                                                                                                                                                                                                                                                                                                                                                                                                                                                                                                                                                                                                        |
|                                 |                                                                                                                                                                                                                                                                                                                                                                                                                                                                                                                                                                                                                                                                                           |

SCHOLARONE™  
Manuscripts

1  
2  
3 **Title: Inconsistent condom use by male clients during anal intercourse with female sex**  
4  
5 **workers (FSWs): Survey findings from three high-prevalence states of India**  
6  
7  
8  
9

10  
11 **Corresponding author**  
12

13 Shreena Ramanathan  
14 Technical Manager, M&E, Knowledge Network, DAKSH  
15 FHI 360, India  
16 H-5 (Ground Floor), Green Park Extension,  
17 New Delhi - 110016,  
18 India  
19 E-mail: [sramanathan@fhi360.org](mailto:sramanathan@fhi360.org)  
20 Ph: 91-11-40487777  
21 Fax: 91-11-26172646  
22  
23  
24  
25

26 **Co-Authors**

27 Karikalan Nagarajan, National AIDS Research Institute (NARI) Pune, India  
28 Lakshmi Ramakrishnan, FHI 360, New Delhi, India  
29 Mandar K Mainkar, National AIDS Research Institute (NARI) Pune, India  
30 Prabuddhagopal Goswami, FHI 360, New Delhi, India  
31 Diwakar Yadav, formerly with FHI 360, New Delhi, India  
32 Shrabanti Sen, FHI 360, New Delhi, India  
33 Bitra George, FHI 360, New Delhi, India  
34 Harikumar Rachakulla, National Institute of Nutrition (NIN), Hyderabad, India  
35 Thilakavathi Subramanian, National Institute of Epidemiology (NIE), Chennai, India  
36 Ramesh S. Paranjape, National AIDS Research Institute (NARI) Pune, India  
37  
38  
39  
40  
41

42 **Emails:**

43  
44 KN: [drkarikalan82@gmail.com](mailto:drkarikalan82@gmail.com)  
45 LR: [ramaklak@gmail.com](mailto:ramaklak@gmail.com)  
46 MM: [mandar5670@gmail.com](mailto:mandar5670@gmail.com)  
47 PG: [pgoswami@fhi360.org](mailto:pgoswami@fhi360.org)  
48 DY: [yadavdiwakar7@gmail.com](mailto:yadavdiwakar7@gmail.com)  
49 SS: [SSen@fhi360.org](mailto:SSen@fhi360.org)  
50 BG: [BGeorge@fhi360.org](mailto:BGeorge@fhi360.org)  
51 HR: [drharikumar1959@yahoo.co.in](mailto:drharikumar1959@yahoo.co.in)  
52 TS: [thilakavathi\\_s@rediffmail.com](mailto:thilakavathi_s@rediffmail.com)  
53 RSP: [rparanjape@nariindia.org](mailto:rparanjape@nariindia.org)  
54  
55  
56  
57  
58  
59  
60

1  
2  
3 **Keywords:** clients of female sex workers, FSW, anal intercourse, condom use, HIV, STI, India,  
4  
5 Maharashtra, Tamil Nadu, Andhra Pradesh  
6  
7

8  
9 **Word count: 3004** (Introduction, methods, results and conclusion)  
10  
11  
12  
13  
14  
15  
16  
17  
18  
19  
20  
21  
22  
23  
24  
25  
26  
27  
28  
29  
30  
31  
32  
33  
34  
35  
36  
37  
38  
39  
40  
41  
42  
43  
44  
45  
46  
47  
48  
49  
50  
51  
52  
53  
54  
55  
56  
57  
58  
59  
60

For peer review only

## **Abstract**

### **Objectives**

Recent studies from India have documented varying estimates of self-reported anal intercourse (ranging 3% to 80%) by female sex workers (FSWs). However, comparable data on anal intercourse and condom use from male clients of FSWs is lacking. Using data from a bio-behavioural survey (2009–2010), we examined prevalence of anal intercourse, male clients' self-reported inconsistent condom use during anal intercourse with FSWs, and correlates of this behavior in three of India's high-prevalence states — Andhra Pradesh, Maharashtra and Tamil Nadu.

### **Methods**

Using two-stage time location cluster sampling, we recruited 4,803 clients of FSWs, ages 18–60 years, who had purchased sex from an FSW in the past month. After obtaining informed consent, respondents were interviewed and tested for HIV and STIs (syphilis, gonorrhoea and chlamydia). Logistic regression analysis was used to identify the factors associated with inconsistent condom use during anal intercourse (in the past six months) with FSWs.

### **Results**

Overall, 12.4% clients reported anal intercourse in the past six months, of which 48.4% used condoms inconsistently. Clients of FSWs who were ages 26 years or older (AOR: 2.68,  $p=0.032$ ); employed as manual laborers (AOR: 2.43,  $p=0.013$ ); consumed alcohol (AOR: 2.63,  $p=0.001$ ), reported five or more sex acts with FSWs in the past month (AOR: 2.53,  $p=0.031$ ) and perceived

1  
2  
3 themselves to be at higher risk for HIV (AOR: 4.82, p=0.001) were more likely to inconsistently  
4 use condoms during anal intercourse.  
5  
6  
7

## 8 9 **Conclusion**

10 The results suggest that sex workers and their clients commonly practice anal intercourse, but a  
11 relatively high proportion of clients do not consistently use condoms, leading to a greater risk of  
12 acquiring HIV and its further transmission to other male and female sexual partners. Given the  
13 multidirectional risk, safer sex communication on heterosexual anal intercourse must be  
14 incorporated into HIV prevention programs.  
15  
16  
17  
18  
19  
20  
21  
22  
23  
24  
25

## 26 **Article summary**

27  
28 This paper discusses the prevalence of anal intercourse, male clients' self-reported inconsistent  
29 condom use during anal intercourse with FSWs, and correlates of this behavior in Andhra  
30 Pradesh, Maharashtra and Tamil Nadu.  
31  
32  
33  
34  
35  
36  
37  
38  
39

## 40 **Key messages**

- 41  
42 • Sex workers and their clients commonly practice anal intercourse, but a relatively high  
43 proportion of clients do not consistently use condoms, resulting in a greater risk of  
44 acquiring HIV and its further transmission to other male and female sexual partners.  
45  
46  
47  
48
- 49 • Safer sex messages on heterosexual anal intercourse should be incorporated into HIV  
50 prevention interventions for both FSWs and their clients.  
51  
52  
53  
54  
55  
56  
57  
58  
59  
60

### Strengths and limitations of this study

- Using data from a large scale multi-site bio-behavioral survey, this paper discusses the prevalence and practice of unprotected anal intercourse among clients of sex workers in three high HIV prevalence states of India.
- Both anal intercourse and condom use are self-reported measures and may therefore be influenced by the social desirability bias, resulting in under or over reporting of the phenomena.

## Introduction

Heterosexual anal intercourse (HAI) is an understudied risk behavior among clients of female sex workers (CFSWs), a vulnerable population that has been identified as a critical bridge group in HIV transmission.<sup>1 2</sup> HAI has thus far received little attention, even though depictions of heterosexual anal intercourse can be found in art and artifacts dating to antiquity.<sup>3</sup> The silence on this front is perhaps linked to society's discomfort with HAI, coupled with the notion that anal intercourse is a homosexual male practice, not heterosexual.<sup>3 4</sup> Most HIV transmission in India occurs through heterosexual networks<sup>5 6</sup>, and unprotected, heterosexual transactional sex plays a central role in the spread of HIV.<sup>7</sup> Previous studies indicate that condom usage is higher for vaginal intercourse than for heterosexual anal sex.<sup>8 9</sup> Furthermore, studies have documented condom breakage when condoms were used during anal intercourse, thereby increasing chances of infection.<sup>10-12</sup> While behavioral interventions targeting FSWs have substantially reduced HIV prevalence in general, the FSWs' HIV and STI vulnerability remains high due to the increasing trend of risky behaviors, such as unprotected anal intercourse with clients.<sup>13 14</sup>

Given the high vulnerabilities associated with HAI in commercial and non-commercial sex settings, a few research studies have assessed anal intercourse prevalence and associated factors among FSWs and the general population.<sup>15-17</sup> Similar to findings from other countries in commercial sex settings, studies on FSWs in India have also documented increased trend for anal intercourse with clients.<sup>13 14 18</sup> Varying estimates of anal intercourse prevalence have been documented in India, ranging from 3 to 80.<sup>13 18 19</sup> In India and elsewhere, the primary reason for FSWs selling anal sex is the extra money it brings from clients. It is also linked to associated factors such as economic hardship, debt status and lack of alternate source of income.<sup>14 18</sup> Anal intercourse is usually demand driven, not preferred by FSWs and at times even forced by clients

1  
2  
3 through violence.<sup>15 18 20 21</sup> Both intervention and research in the area are extensive among FSWs.  
4  
5 However, there is paucity of behavioral research on clients' self-reported anal intercourse and  
6  
7 condom use during anal intercourse. This paper examines the correlates of clients' inconsistent  
8  
9 condom use during anal intercourse with FSWs. The study has used cross-sectional survey data  
10  
11 collected from clients of FSW in three high HIV prevalence states of India.  
12  
13

## 14 15 16 **Materials and Methods**

### 17 18 19 *Data source*

20  
21  
22 Data were derived from a cross-sectional bio-behavioural survey (called integrated behavioral  
23  
24 and biological assessment [IBBA]) that was conducted among clients of FSWs as part of the  
25  
26 evaluation of a large-scale HIV prevention program in 12 districts across the three Indian states  
27  
28 of Andhra Pradesh, Maharashtra and Tamil Nadu during 2009–2010. Men, of ages 18–60 years,  
29  
30 who reported purchasing sex from an FSW in the past month, were considered eligible  
31  
32 respondents. These eligible respondents were identified with the help of FSWs, brokers, pimps,  
33  
34 etc., at places of FSW solicitation/entertainment and recruited for the study. The survey used a  
35  
36 two-stage cluster sampling design with time location clusters (TLCs) as primary sampling units.  
37  
38 Clusters were randomly selected by using probability proportional to size (PPS) in the first stage.  
39  
40 From these selected clusters, respondents were then selected through systematic random  
41  
42 sampling in the second stage. Behavioral information was collected through a structured,  
43  
44 interviewer-administered questionnaire, and blood and urine samples were collected to test for  
45  
46 HIV and other STIs (gonorrhoea, chlamydia, syphilis). A detailed description of the survey  
47  
48 methodology is available elsewhere.<sup>22</sup>  
49  
50  
51  
52  
53  
54  
55  
56  
57  
58  
59  
60



1  
2  
3 Prior oral or written informed consent was obtained from all respondents. The survey was  
4  
5 approved by the ethics committees of the participating institutes of Indian Council of Medical  
6  
7 Research (National AIDS Research Institute, Pune; National Institute of Nutrition, Hyderabad;  
8  
9 and National Institute of Epidemiology, Chennai) and FHI 360 (Protection of Human Subjects  
10  
11 Committee).  
12  
13

### 14 15 16 17 *Conceptual framework* 18

19  
20 For the current analysis, a conceptual framework (Figure 1, illustrated below) was used as a  
21  
22 device to explain and identify the different factors that may be associated with inconsistent  
23  
24 condom use during anal intercourse with FSWs.  
25  
26

27  
28 Inconsistent condom use during anal intercourse was the dependent variable. The independent  
29  
30 variables were selected based on their contextual relation with the dependent variable. Based on  
31  
32 prior research, individual factors such as risk perception, alcohol use,<sup>23-25</sup> frequency of  
33  
34 commercial sex, volume of sex acts,<sup>14 26</sup> having male/transgender partners,<sup>27</sup> place of soliciting  
35  
36 FSWs<sup>5</sup> and having HIV/STIs,<sup>18</sup> which are widely seen to influence condom use among different  
37  
38 high-risk population groups, were included. We hypothesized that clients who were married,  
39  
40 consumed alcohol, solicited FSWs from public places and had a higher number of FSW partners  
41  
42 were more likely to be inconsistent condom users. These clients were also more likely to have  
43  
44 experienced anal sex with a man. Most current interventions for clients of FSWs are limited to  
45  
46 condom promotion and distribution, and no intervention for FSWs or their clients currently  
47  
48 addresses heterosexual anal intercourse, which has significant implications for HIV prevention  
49  
50 programming.  
51  
52  
53  
54  
55  
56  
57  
58  
59  
60

1  
2  
3 Based on the rationale described above, we grouped the different indicators into two categories:  
4  
5 a) socio-demographic and b) HIV-related sexual risk behaviors.  
6  
7

### 8 *Measures*

#### 9 *Dependent variable:*

10  
11  
12 Inconsistent condom use during anal intercourse - This behavior was assessed by asking: “How  
13  
14 often did you use a condom while having anal intercourse with your regular and occasional  
15  
16 FSWs in the past six months?” The clients who reported using condoms most of the time,  
17  
18 sometimes or never were considered inconsistent condom users (coded as ‘1’), while those who  
19  
20 reported using condoms every time during anal intercourse were considered consistent condom  
21  
22 users (coded as ‘0’).  
23  
24  
25  
26  
27  
28  
29  
30  
31  
32

#### 33 *Independent variables:*

34  
35  
36 The independent variables included age in completed years; education (illiterate, can read only,  
37  
38 can read and write); occupation (pre-coded as unemployed, student, domestic servant,  
39  
40 agricultural labor, non-agricultural/casual labor, skilled/semi-skilled labor, petty  
41  
42 businessman/shop owner, large businessman/shop owner, bus/truck drivers/helpers, other  
43  
44 transport workers, service and others); marital status (currently married, separated, divorced,  
45  
46 widowed, never married, no answer); place of soliciting FSWs (pre-coded as bar/night club,  
47  
48 public place, street, park, railway station, agent, brothel, hotel/lodge, home, *dhaba*, by telephone,  
49  
50 other); number of FSWs had sex with in the past month; number of sex acts with FSWs in the  
51  
52 past month; ever had anal intercourse with a man/transgender (yes/no); self-risk perception  
53  
54  
55  
56  
57  
58  
59  
60

1  
2  
3 (yes/no); alcohol consumption (everyday, at least once a week, less than once a week, never, no  
4  
5 answer); and having HIV or any STI (those having HIV, syphilis, gonorrhoea or chlamydia were  
6  
7 grouped into positive and the rest as negative).  
8  
9

10  
11 Given the skewed distribution, all the variables were dichotomized for the analysis. Age was  
12  
13 categorized into  $\leq 25$  years and 26 years or older; education was grouped into literate and  
14  
15 illiterate; occupation into laborers (manual) and non-laborers, marital status as currently married  
16  
17 and never married/widowed/separated/divorced; place of soliciting FSWs into public place and  
18  
19 non-public place; number of FSWs had sex with as  $\leq 3$  FSWs and  $\geq 4$  FSWs; number of sex acts  
20  
21 as  $\leq 4$  times and  $\geq 5$  times; and alcohol use into frequent and infrequent drinkers.  
22  
23  
24  
25

### 26 *Statistical analysis*

27  
28  
29 Descriptive statistics were calculated and used to measure the levels of inconsistent condom use  
30  
31 (during anal intercourse) and other selected variables. Chi-square tests were used to assess the  
32  
33 significance of bivariate relationships between demographic characteristics of clients and their  
34  
35 condom use behaviour during anal intercourse. Multiple logistic regression model was used to  
36  
37 identify factors that were independently predictive of inconsistent condom use during anal  
38  
39 intercourse, with adjusted odds ratio calculated at a significance level less than 0.05. Statistical  
40  
41 calculations were conducted using aggregated data of clients of FSWs from all three states, since  
42  
43 the eligibility criteria for respondents and the methods of sampling and behavioural data  
44  
45 collection were standardized and same in all the three states. Analysis was done by applying  
46  
47 appropriate weights. At the district level, weighting was based on the cluster effect of the sample.  
48  
49 At the aggregate level, standardized weights were calculated by combining the 12 districts.  
50  
51 STATA/SE version 11® (Stata Corporation, College Station, TX) was used for all the analyses.  
52  
53  
54  
55  
56  
57  
58  
59  
60

## Results

Of the 4,803 clients of FSWs (Andhra Pradesh (n=2016), Tamil Nadu (n=1217), and Maharashtra (n=1570), 12.4% reported having had anal intercourse in the past six months; 48.4% among them used condoms inconsistently during anal intercourse. In Andhra Pradesh, Maharashtra and Tamil Nadu those reporting anal sex were 19.1%, 6.6% and 17.7% respectively (Data not shown in table). Condom use during anal and vaginal sex varied widely in the different states. 75.5% clients in Andhra Pradesh, 16.2% in Maharashtra and 8.2% in Tamil Nadu reported using condoms consistently during anal sex with FSW. In contrast, the reported condom use during vaginal sex was nearly 50% in Tamil Nadu, 40% in Andhra Pradesh and 10.5% in Maharashtra (Data not shown in table).

As presented in Table 1, the bivariate analysis shows that the majority of inconsistent condom users were ages 26 years or older (84.3%), married (79.8 %) and solicited FSWs from public places (77.1 %). Literacy levels were lower among inconsistent condom users than among consistent condom users (50.0 % vs. 85.2 %,  $p=0.003$ ). Similarly, a lower proportion of inconsistent condom users reported having had anal intercourse with a man than consistent condom users (18.7 % vs. 39.4 %,  $p=0.022$ ). A higher proportion of inconsistent condom users consumed alcohol frequently (56.0 % vs. 37.5%,  $p=0.031$ ) and considered themselves at risk of exposure to HIV than consistent condom users (47.9 % vs. 7.13 %,  $p=0.000$ ). More than 30 % inconsistent condom users tested positive for HIV/STI, compared to a smaller proportion of consistent condom users (32.3 % vs. 9.7 %,  $p=0.085$ ), but the association is not significant.

Table 2 shows the independent factors associated with inconsistent condom use during anal intercourse with FSWs. Clients of FSWs who were ages 26 years or older (AOR: 2.68,  $p=0.032$ ),

1  
2  
3 employed as manual laborers (AOR: 2.43, p=0.013), consumed alcohol (AOR: 2.63, p=0.001),  
4 reported five or more sex acts with FSWs in the past month (AOR: 2.53, p=0.031), and perceived  
5 themselves to be at higher risk for HIV (AOR: 4.82, p=0.001) were more likely to inconsistently  
6 use condoms during anal intercourse than their counterparts. On the other hand, clients who were  
7 currently married (AOR: 0.41, p=0.056) and had sex with more number of FSWs ( $\geq 4$  and above)  
8 in the past month were less likely to inconsistently use condoms during anal intercourse than  
9 those never married/separated/divorced/widowed and who had sex with less than three FSWs.  
10 Testing positive for HIV or STI was not found to be associated with inconsistency in condom use  
11 during anal intercourse. Similarly, factors such as literacy level, place where the client solicited  
12 FSWs and whether he had had anal sex with a male/hijra partner were not associated with  
13 inconsistency in condom use during anal intercourse.  
14  
15  
16  
17  
18  
19  
20  
21  
22  
23  
24  
25  
26  
27  
28  
29  
30  
31  
32

### 33 Discussion

34  
35  
36 IBBA, one of the few surveys in India to study large samples of clients of FSWs, has  
37 documented the practice of unprotected anal intercourse in three high HIV prevalence states of  
38 the country. Its findings show that anal intercourse is a substantial part of the commercial sex  
39 activity in India, with about 12 percent clients reporting experience of anal intercourse and  
40 nearly half of them not using condoms during anal intercourse with FSWs. The profile of clients  
41 who reported having unprotected anal intercourse with FSW varied from clients who did not  
42 report unprotected sex. Clients who were 26 years or older, frequently used alcohol, worked as  
43 manual laborers and reported higher number of sex acts with FSWs were at an increased risk of  
44 unprotected anal intercourse.  
45  
46  
47  
48  
49  
50  
51  
52  
53  
54  
55  
56  
57  
58  
59  
60

1  
2  
3 In the absence of comparable estimates on anal intercourse from client surveys in India, we  
4  
5 examined the estimates available from studies on FSWs.<sup>13 14 18</sup> It was apparent that there is a high  
6  
7 demand for anal sex. When compared with the prevalence reported by previous FSW studies, the  
8  
9 prevalence estimated in the current analysis seems to be much lower. Anal sex is certainly  
10  
11 stigmatized among FSWs and they have a reason to under report condom use. However, we  
12  
13 don't know if it is similar for men and this was not measured and is a major limitation.  
14  
15

16  
17  
18 The finding that older clients are at a higher risk of inconsistent condom use has been reported  
19  
20 previously. Inconsistent condom use during vaginal intercourse with FSWs was found to be  
21  
22 significantly associated with older clients.<sup>2</sup> The average age of marriage for Indian men is  
23  
24 documented to be 26 years, and a majority of men (clients of FSWs) in this sample were married.  
25  
26 A possible explanation for this risky behavior among older men could be the need to fulfill  
27  
28 sexual desires or experimentation, followed by the belief that paying for sex would be less  
29  
30 troublesome and more entertaining than sexual involvement with a non-sex worker.<sup>28</sup> It could  
31  
32 also be plausible that inability of the older men to maintain erections may have resulted in  
33  
34 inconsistent use of condoms during anal sex when compared to younger men. Older men who  
35  
36 have sex with men have also been found to practice risky sexual behavior like inconsistent  
37  
38 condom use.<sup>29</sup>  
39  
40  
41  
42  
43

44  
45 Likewise, clients who were manual laborers were more likely to be inconsistent condom users,  
46  
47 compared to those in other occupations (white collar workers). The manual laborers in the  
48  
49 current study include agricultural and non-agricultural laborers and cultivators. It is possible that  
50  
51 many of these men migrated for work and stay away from their families. Additional analysis was  
52  
53 undertaken to understand this dimension better; more than 50 % respondents reported travelling  
54  
55 in the past one year, primarily for work. These men also reported buying sex from FSWs. Given  
56  
57  
58  
59  
60

1  
2  
3 this scenario, it is imperative that tailored interventions be designed for those involved in manual  
4 labor, who are often difficult to engage in prevention programs. These men could be captured  
5 through networks of labor contractors and migrant populations. Educational campaigns and  
6 counseling are also important to promote condom use for all partners and all types of sex.  
7  
8  
9

10  
11 Our study also found that clients with higher self-perceived risk for HIV were more likely to be  
12 inconsistent condom users. Such an association could be attributed to the fact that knowledge  
13 and perceptions about safe or risky sex may not be sufficient to change an individual's behavior  
14 until self-efficacy and determination in executing a behavior or action are present.<sup>30</sup> Studies that  
15 have used the self-efficacy model among heterosexually active students have documented that  
16 risk perceptions have no influence over condom use, as was noted in this study.<sup>8 31</sup> Another  
17 plausible reason could be the lack of targeted interventions for clients, which, if present, could  
18 have inculcated a sense of responsibility toward their sexual partners.  
19  
20  
21  
22  
23  
24  
25  
26  
27  
28  
29  
30  
31

32 Men who consume alcohol have been found more likely to engage in unprotected sex and anal  
33 sex and have more than 10 FSW partners.<sup>32</sup> A similar association was observed in our study,  
34 where clients who consumed alcohol frequently and reported five or more sexual encounters  
35 were found to inconsistently use condoms during anal intercourse. It seems that the survey has  
36 been able to capture high-risk clients, who have higher volume of sex acts with FSWs, engage in  
37 anal intercourse and do not use condoms. Alcohol use and its association with HIV-related  
38 sexual risk is well documented.<sup>32-34</sup> HIV prevention interventions must address this important  
39 issue linked with compromise in safe sex practices/behavior. There is a clear need for HIV  
40 prevention interventions tailored to provide information on alcohol related sexual risk.  
41  
42  
43  
44  
45  
46  
47  
48  
49  
50  
51  
52  
53

54 Although studies from the early 1990s have highlighted anal intercourse as a risk factor for  
55 HIV,<sup>9 35</sup> most AIDS prevention messages targeting heterosexuals continue to focus only on  
56  
57  
58  
59  
60

1  
2  
3 vaginal and oral sex transmission. Cultural taboos have possibly played a major role against  
4  
5 acknowledging anal sexual practice. Research on vulnerable populations, including FSWs and  
6  
7 youth, indicate that the persons particularly at risk of being infected by or transmitting HIV are  
8  
9 more likely to practice anal intercourse.<sup>36</sup> Furthermore, people with experience in anal  
10  
11 intercourse have been found to take more sexual risk when engaging in vaginal intercourse than  
12  
13 those without anal experience.<sup>8</sup> Another important aspect is the condom negotiating ability of sex  
14  
15 workers with clients. Factors in the physical, economic and policy environment influence  
16  
17 condom use. In addition, the gendered power dynamics and the lack of choice sex workers have  
18  
19 with heterosexual anal intercourse exacerbates their vulnerability. Sex workers need to be  
20  
21 empowered to negotiate condom use with clients and motivate unwilling clients to use condoms  
22  
23 during anal/vaginal sex.<sup>37</sup>  
24  
25  
26  
27  
28  
29  
30  
31  
32

### 33 **Limitations of the study**

34  
35  
36 Our study has its limitations. For one, both anal intercourse and condom use are self-reported  
37  
38 measures and may, therefore, be influenced by the social desirability bias. As indicated by  
39  
40 previous research, the social desirability bias gives rise to the possibility of underreporting.  
41  
42 Given the difficulty in evaluating the magnitude of underreporting, we must be cautious in  
43  
44 concluding that anal intercourse is practiced at relatively low rates among this population.  
45  
46 Another limitation is that the analysis included only those clients who having reported anal sex  
47  
48 which is a small fraction of the total number of clients. Further, we did not have information on  
49  
50 anal intercourse with regular female partners to establish concurrency or multidirectional risk  
51  
52 during anal intercourse. Also, the survey did not gather information on violence/coercion during  
53  
54  
55  
56  
57  
58  
59  
60



1  
2  
3 anal sex. Future studies need to address these gaps. In addition, qualitative studies are needed to  
4  
5 better understand the context in which anal intercourse occurs. In spite of these limitations, this  
6  
7 is one of the first studies to document for the clients of FSWs the practice of anal intercourse and  
8  
9 the correlates of condom use during anal intercourse.  
10  
11

## 12 13 **Conclusions**

14  
15  
16  
17 The study indicates that HIV prevention programs targeting FSWs and their clients must  
18  
19 highlight the increased risk unprotected anal intercourse poses for both self and partners.  
20  
21 Condoms and water-based lubricants need to be marketed to reduce these risks. Interventions  
22  
23 also need to address factors that influence condom negotiation ability of sex workers. Given the  
24  
25 multidirectional risk, condom promotion programs must be extended to include specific  
26  
27 information on the benefits of consistent condom use while engaging in anal and other types of  
28  
29 sex. Safer sex messages addressing heterosexual anal intercourse need to be incorporated into  
30  
31 HIV prevention interventions for both FSWs and their clients. Current prevention programs fail  
32  
33 to address this issue. Greater emphasis in AIDS/STI prevention must be given to this typically  
34  
35 stigmatized and underreported sexual practice.  
36  
37  
38  
39  
40  
41  
42  
43  
44  
45  
46  
47  
48  
49  
50  
51  
52  
53  
54  
55  
56  
57  
58  
59  
60

## Acknowledgement

The authors wish to thank the Avahan state implementation partners for their partnership in this study. We thank Dr. Stephen Schensul, Dr. Niranjan Saggurti and Dr. Bidhu Bhushan Mahapatra for providing critical inputs during concept development and analysis. We also extend our gratitude to Dr. Steve Mills from FHI 360, Asia Pacific Regional Office, Bangkok, Thailand, for his inputs in the finalization of this manuscript. Finally, we thank the respondents for their participation in the study.

An earlier version (abstract) of this research paper was presented at the STI & AIDS World Congress 2013 in Vienna, Austria.

## Funding

The Bill & Melinda Gates Foundation funded this research through Avahan: the India AIDS Initiative. The views expressed herein are those of the authors and do not necessarily reflect the official policy or position of the foundation and Avahan.

## Contributors

SR and KN contributed to concept development, data analysis and interpretation, and writing and finalization of the manuscript. LR, PG, DY, SS, BG, HR, TS, and RSP contributed to concept design, review and finalization of the manuscript.

## Competing interests

None declared

### Data sharing statement

IBBA Round 1 (2005-07) and Round 2 (2009-2010) data are available on request from the National AIDS Research Institute (NARI). The request form can be accessed from:

[http://www.nari-icmr.res.in/pdf/IBBA/Agreement-for-accessing-raw-IBBA%20\\_R1-&-R2\\_data.pdf](http://www.nari-icmr.res.in/pdf/IBBA/Agreement-for-accessing-raw-IBBA%20_R1-&-R2_data.pdf)

Other IBBA-related documents are available at:

[www.ibbainfo.in](http://www.ibbainfo.in)

### Ethics approval

Clearance for the study was taken from ethics committees of the participating institutes of Indian Council of Medical Research (National AIDS Research Institute, Pune; National Institute of Nutrition, Hyderabad; and National Institute of Epidemiology, Chennai) and FHI 360 (Protection of Human Subjects Committee).

## References:

1. National AIDS Control Organisation MoHaFW, Government of India. 2006. New Delhi, National Behavioural Surveillance Survey (BSS)-Female Sex Workers (FSWs) and their Clients.
2. Subramanian T, Gupte MD, Paranjape RS, et al. HIV, sexually transmitted infections and sexual behaviour of male clients of female sex workers in Andhra Pradesh, Tamil Nadu and Maharashtra, India: results of a cross-sectional survey. *AIDS* 2008 **22** ( 5):S69-79. .
3. McBride KR, Fortenberry JD. Heterosexual anal sexuality and anal sex behaviors: a review. *Journal of sex research* 2010;**47**(2):123-36.
4. Voeller B. AIDS and heterosexual anal intercourse. (0004-0002 (Print)).
5. Suryawanshi D, Bhatnagar T, Deshpande S, et al. Diversity among Clients of Female Sex Workers in India: Comparing Risk Profiles and Intervention Impact by Site of Solicitation. Implications for the Vulnerability of Less Visible Female Sex Workers. *PloS one* 2013;**8**(9):e73470.
6. National AIDS Control Organisation MoHaFW, Government of India. HIV Sentinel Surveillance 2010-11: A Technical Brief. New Delhi, 2012.
7. Samet JH, Pace CA, Cheng DM, et al. Alcohol use and sex risk behaviors among HIV-infected female sex workers (FSWs) and HIV-infected male clients of FSWs in India. *AIDS Behav* 2010;**14** (1):S74-83.
8. Baldwin JI, Baldwin JD. Heterosexual anal intercourse: an understudied, high-risk sexual behavior. *Archives of sexual behavior* 2000;**29**(4):357-73.
9. Halperin DT. Heterosexual anal intercourse: prevalence, cultural factors, and HIV infection and other health risks, Part I. *AIDS patient care and STDs* 1999;**13**(12):717-30.
10. Bradley J, Rajaram S, Moses S, et al. Female sex worker client behaviors lead to condom breakage: a prospective telephone-based survey in Bangalore, South India. *AIDS and behavior* 2013;**17**(2):559-67.
11. Priddy FH, Wakasiaka S, Hoang TD, et al. Anal sex, vaginal practices, and HIV incidence in female sex workers in urban Kenya: implications for the development of intravaginal HIV prevention methods. *AIDS research and human retroviruses* 2011;**27**(10):1067-72.
12. Bradley J, Rajaram S, Alary M, et al. Determinants of condom breakage among female sex workers in Karnataka, India. *BMC public health* 2011;**11 Suppl 6**:S14.
13. Beattie TS, Bradley JE, Vanta UD, et al. Vulnerability re-assessed: the changing face of sex work in Guntur district, Andhra Pradesh. *AIDS care* 2013;**25**(3):378-84.
14. Tucker S, Krishna R, Prabhakar P, et al. Exploring dynamics of anal sex among female sex workers in Andhra Pradesh. *Indian journal of sexually transmitted diseases* 2012;**33**(1):9-15.
15. Schwandt M Fau - Morris C, Morris C Fau - Ferguson A, Ferguson A Fau - Ngugi E, et al. Anal and dry sex in commercial sex work, and relation to risk for sexually transmitted infections and HIV in Meru, Kenya. *Sex Transm Infect* 2006 (1368-4973 (Print)).
16. Heywood W, Smith AM. Anal sex practices in heterosexual and male homosexual populations: a review of population-based data. *Sexual health* 2012;**9**(6):517-26.
17. Veldhuijzen NJ IC, Luchters S, Bosire W, et al. Anal intercourse among female sex workers in East Africa is associated with other high-risk behaviours for HIV. *Sex Health* 2011 **8**(2):251-4.
18. Patra RK, Mahapatra B, Kovvali D, et al. Anal sex and associated HIV-related sexual risk factors among female sex workers in Andhra Pradesh, India. *Sexual health* 2012;**9**(5):430-7.
19. M. A. A Blind Spot in HIV prevention-Female Anal Sex.

- 1
  - 2
  - 3
  - 4
  - 5
  - 6
  - 7
  - 8
  - 9
  - 10
  - 11
  - 12
  - 13
  - 14
  - 15
  - 16
  - 17
  - 18
  - 19
  - 20
  - 21
  - 22
  - 23
  - 24
  - 25
  - 26
  - 27
  - 28
  - 29
  - 30
  - 31
  - 32
  - 33
  - 34
  - 35
  - 36
  - 37
  - 38
  - 39
  - 40
  - 41
  - 42
  - 43
  - 44
  - 45
  - 46
  - 47
  - 48
  - 49
  - 50
  - 51
  - 52
  - 53
  - 54
  - 55
  - 56
  - 57
  - 58
  - 59
  - 60
20. Allen B, Cruz-Valdez A, Rivera-Rivera L, et al. [Affection, kisses, and condoms: the ABC of sexual practices of female sex workers in Mexico City]. *Salud publica de Mexico* 2003;**45 Supp 5**:S594-607.
21. Decker Mr Fau - McCauley HL, McCauley HI Fau - Phuengsamran D, et al. Violence victimisation, sexual risk and sexually transmitted infection symptoms among female sex workers in Thailand. (1472-3263 (Electronic)).
22. Saidel T, Adhikary R, Mainkar M, et al. Baseline integrated behavioural and biological assessment among most at-risk populations in six high-prevalence states of India: design and implementation challenges. *AIDS (London, England)* 2008;**22**:S17-S34 10.1097/01.aids.0000343761.77702.04.
23. Myers T, Rowe CJ, Tudiver FG, et al. HIV, substance use and related behaviour of gay and bisexual men: an examination of the talking sex project cohort. *British journal of addiction* 1992;**87**(2):207-14.
24. Mimiaga MJ, Thomas B, Mayer KH, et al. Alcohol use and HIV sexual risk among MSM in Chennai, India. *International journal of STD & AIDS* 2011;**22**(3):121-5.
25. Greene E, Frye V, Mansergh G, et al. Correlates of unprotected vaginal or anal intercourse with women among substance-using men who have sex with men. *AIDS and behavior* 2013;**17**(3):889-99.
26. Mahapatra B, Lowndes CM, Mohanty SK, et al. Factors associated with risky sexual practices among female sex workers in Karnataka, India. *PloS one* 2013;**8**(4):e62167.
27. Grov C, Wolff M, Smith MD, et al. Male Clients of Male Escorts: Satisfaction, Sexual Behavior, and Demographic Characteristics. *Journal of sex research* 2013.
28. Pitts MK, Smith Am Fau - Grierson J, Grierson J Fau - O'Brien M, et al. Who pays for sex and why? An analysis of social and motivational factors associated with male clients of sex workers. (0004-0002 (Print)).
29. Ramanathan S, Chakrapani V, Ramakrishnan L, et al. Consistent condom use with regular, paying, and casual male partners and associated factors among men who have sex with men in Tamil Nadu, India: findings from an assessment of a large-scale HIV prevention program. *BMC public health* 2013;**13**(1):827.
30. Bandura A. Perceived self-efficacy in the exercise of control over AIDS infection. *Evaluation and Program Planning* 1990;**13**(1):9-17.
31. Wulfert E WC. Condom use: a self-efficacy model. *Health Psychol* 1993 **12**(5):346-53.
32. Madhivanan P HA, Gogate A, Stein E, et al. Alcohol use by men is a risk factor for the acquisition of sexually transmitted infections and human immunodeficiency virus from female sex workers in Mumbai, India. *Sexually transmitted diseases* 2005;**32**(11):685-90.
33. Schensul J, Singh SK, Gupta K, et al. Alcohol and HIV in India: A Review of Current Research and Intervention. *AIDS and behavior* 2010;**14**(1):1-7.
34. Mimiaga MJ, Thomas B, Mayer KH, et al. Alcohol use and HIV sexual risk among MSM in Chennai, India. *International journal of STD & AIDS* 2011;**22**(3):121-25.
35. Erickson PI, Bastani R, Maxwell AE, et al. Prevalence of anal sex among heterosexuals in California and its relationship to other AIDS risk behaviors. *AIDS education and prevention : official publication of the International Society for AIDS Education* 1995;**7**(6):477-93.
36. Stulhofer A, Bacak V. Is anal sex a marker for sexual risk-taking? Results from a population-based study of young Croatian adults. *Sexual health* 2011;**8**(3):384-9.
37. Bharat S, Mahapatra B, Roy S, et al. Are Female Sex Workers Able to Negotiate Condom Use with Male Clients? The Case of Mobile FSWs in Four High HIV Prevalence States of India. *PloS one* 2013;**8**(6):e68043.

**Table 1: Characteristics of clients of FSWs who reported anal intercourse (past six months) with occasional and regular FSWs and condom use**

| Characteristics                                                 | Consistent condom users<br>(n=397, 51.5%)<br>% (number) | Inconsistent condom users<br>(n=280, 48.4%)<br>% (number) | p-value |
|-----------------------------------------------------------------|---------------------------------------------------------|-----------------------------------------------------------|---------|
| State                                                           |                                                         |                                                           |         |
| Andhra Pradesh                                                  | 75.5(281)                                               | 18.2(58)                                                  | 0.000   |
| Tamil Nadu                                                      | 8.2(43)                                                 | 48.0(84)                                                  |         |
| Maharashtra                                                     | 16.2(73)                                                | 33.7(138)                                                 |         |
| Age                                                             |                                                         |                                                           |         |
| ≤25 years                                                       | 27.1 (117)                                              | 15.6 (53)                                                 | 0.165   |
| 26 years or older                                               | 72.8 (280)                                              | 84.3 (227)                                                |         |
| Education                                                       |                                                         |                                                           |         |
| Illiterate                                                      | 14.8 (64)                                               | 49.9 (57)                                                 | 0.003   |
| Literate                                                        | 85.2 (333)                                              | 50.0 (223)                                                |         |
| Marital status                                                  |                                                         |                                                           |         |
| Never married/widowed/separated/divorced                        | 29.8 (120)                                              | 20.11 (84)                                                | 0.266   |
| Currently married                                               | 70.1 (277)                                              | 79.8 (196)                                                |         |
| Occupation                                                      |                                                         |                                                           |         |
| Non-laborer (students/business/service)                         | 51.4 (214)                                              | 46.1 (90)                                                 | 0.749   |
| Manual laborer (agricultural/non-agricultural labor/cultivator) | 48.5 (181)                                              | 53.8 (190)                                                |         |
| Place solicited FSWs                                            |                                                         |                                                           |         |
| Non-public place (brothel/home/lodge/dhaba)                     | 30.6 (117)                                              | 22.9 (93)                                                 | 0.448   |
| Public place                                                    | 69.3 (278)                                              | 77.1 (186)                                                |         |
| No. of FSWs had sex with in the past one month                  |                                                         |                                                           |         |
| ≤3 FSWs                                                         | 72.3 (324)                                              | 86.4 (229)                                                | 0.088   |
| ≥ 4 FSWs and above                                              | 27.6 (73)                                               | 13.5 (51)                                                 |         |
| No. of sex acts with FSWs in the past one month                 |                                                         |                                                           |         |
| ≤ 4 times                                                       | 73.7 (285)                                              | 76.0 (184)                                                | 0.812   |
| ≥ 5 and above                                                   | 26.2 (111)                                              | 23.9 (95)                                                 |         |
| Perceive to be at high risk of exposure to HIV                  |                                                         |                                                           |         |
| No                                                              | 92.8 (337)                                              | 52.0 (188)                                                | 0.000   |
| Yes                                                             | 7.13 (39)                                               | 47.9 (82)                                                 |         |
| Alcohol user                                                    |                                                         |                                                           |         |
| Infrequent drinker                                              | 62.4 (262)                                              | 43.9 (142)                                                | 0.031   |
| Frequent drinker (everyday)                                     | 37.5 (116)                                              | 56.0 (121)                                                |         |
| Ever had anal intercourse with a man/hijra                      |                                                         |                                                           |         |
| No                                                              | 60.5 (311)                                              | 81.2 (179)                                                | 0.022   |
| Yes                                                             | 39.4 (86)                                               | 18.7 (101)                                                |         |
| Any HIV/STIs                                                    |                                                         |                                                           |         |

|          |            |            |       |
|----------|------------|------------|-------|
| Negative | 90.2 (367) | 67.6 (253) | 0.085 |
| Positive | 9.7 (30)   | 32.3 (27)  |       |

**Table 2: Independent factors associated with inconsistent condom use during anal intercourse with FSWs in multivariate analysis**

| Characteristics                                                 | Crude odds ratio (95% CI) | p-value | Adjusted odds ratio (95% CI) | p-value |
|-----------------------------------------------------------------|---------------------------|---------|------------------------------|---------|
| Age                                                             |                           |         |                              |         |
| ≤25 years                                                       | Referent                  |         | Referent                     |         |
| 26 years or older                                               | 2.00 (0.74-5.40)          | 0.170   | 2.68 (1.09-6.61)             | 0.032   |
| Education                                                       |                           |         |                              |         |
| Illiterate                                                      | Referent                  |         | Referent                     |         |
| Literate                                                        | 0.17 (0.05-0.59)          | 0.005   | 0.66 (0.28-1.56)             | 0.347   |
| Occupation                                                      |                           |         |                              |         |
| Non-laborer (student/business/service)                          | Referent                  |         | Referent                     |         |
| Manual laborer (agricultural/non-agricultural labor/cultivator) | 1.23 (0.33-4.48)          | 0.749   | 2.43 (1.21-4.90)             | 0.013   |
| Marital status                                                  |                           |         |                              |         |
| Never married/widowed/separated/divorced                        | Referent                  |         | Referent                     |         |
| Currently married                                               | 1.69 (0.66-4.31)          | 0.269   | 0.32 (0.13-0.80)             | 0.015   |
| Place solicited FSWs                                            |                           |         |                              |         |
| Non-public place (brothel/home/lodge/dhaba)                     | Referent                  |         | Referent                     |         |
| Public place                                                    | 1.49 (0.52-4.20)          | 0.449   | 1.26 (0.60-2.61)             | 0.533   |
| No. of FSWs had sex with in the past one month                  |                           |         |                              |         |
| ≤3 FSWs                                                         | Referent                  |         | Referent                     |         |
| ≥ 4 FSWs and above                                              | 0.41 (0.14-1.16)          | 0.094   | 0.29 (0.10-0.84)             | 0.022   |
| No. of sex acts with FSWs in the past one month                 |                           |         |                              |         |
| ≤ 4 times                                                       | Referent                  |         | Referent                     |         |
| ≥ 5 and above                                                   | 0.88 (0.32-2.41)          | 0.812   | 2.53 (0.09-5.90)             | 0.031   |
| Perceive to be at high risk of exposure to HIV                  |                           |         |                              |         |
| No                                                              | Referent                  |         | Referent                     |         |
| Yes                                                             | 11.99 (3.08-46.5)         | 0.000   | 4.82 (1.91-12.14)            | 0.001   |
| Alcohol user                                                    |                           |         |                              |         |
| Infrequent drinker                                              | Referent                  |         | Referent                     |         |
| Frequent drinker (everyday)                                     | 2.11 (1.06-4.20)          | 0.033   | 2.63 (1.46-4.71)             | 0.001   |
| Ever had anal intercourse with a man/hijra                      |                           |         |                              |         |
| No                                                              | Referent                  |         | Referent                     |         |
| Yes                                                             | 0.35 (0.14-0.87)          | 0.025   | 0.76 (0.39-1.50)             | 0.440   |
| Any HIV/STIs                                                    |                           |         |                              |         |

1  
2  
3  
4  
5  
6  
7  
8  
9  
10  
11  
12  
13  
14  
15  
16  
17  
18  
19  
20  
21  
22  
23  
24  
25  
26  
27  
28  
29  
30  
31  
32  
33  
34  
35  
36  
37  
38  
39  
40  
41  
42  
43  
44  
45  
46  
47  
48  
49  
50  
51  
52  
53  
54  
55  
56  
57  
58  
59  
60

---

|          |                   |       |                  |       |
|----------|-------------------|-------|------------------|-------|
| Negative | Referent          |       | Referent         |       |
| Positive | 4.42 (0.74-26.32) | 0.102 | 0.73 (0.25-2.12) | 0.568 |

---

For peer review only



1  
2  
3 **Title: Inconsistent condom use by male clients during anal intercourse with female sex**  
4 **workers (FSWs): Survey findings from three high-prevalence states of India**  
5  
6  
7  
8  
9  
10

11 **Corresponding author**

12  
13 Shreena Ramanathan  
14 Technical Manager, M&E, Knowledge Network, DAKSH  
15 FHI 360, India  
16 H-5 (Ground Floor), Green Park Extension,  
17 New Delhi - 110016,  
18 India  
19 E-mail: [sramanathan@fhi360.org](mailto:sramanathan@fhi360.org)  
20 Ph: 91-11-40487777  
21 Fax: 91-11-26172646  
22  
23  
24  
25

26 **Co-Authors**

27 Karikalan Nagarajan, National AIDS Research Institute (NARI) Pune, India  
28 Lakshmi Ramakrishnan, FHI 360, New Delhi, India  
29 Mandar K Mainkar, National AIDS Research Institute (NARI) Pune, India  
30 Prabuddhagopal Goswami, FHI 360, New Delhi, India  
31 Diwakar Yadav, formerly with FHI 360, New Delhi, India  
32 Shrabanti Sen, FHI 360, New Delhi, India  
33 Bitra George, FHI 360, New Delhi, India  
34 Harikumar Rachakulla, National Institute of Nutrition (NIN), Hyderabad, India  
35 Thilakavathi Subramanian, National Institute of Epidemiology (NIE), Chennai, India  
36 Ramesh S. Paranjape, National AIDS Research Institute (NARI) Pune, India  
37  
38  
39  
40  
41  
42

43 **Emails:**

44 SR: [sramanathan@fhi360.org](mailto:sramanathan@fhi360.org)  
45 KN: [drkarikalan82@gmail.com](mailto:drkarikalan82@gmail.com)  
46 LR: [ramaklak@gmail.com](mailto:ramaklak@gmail.com)  
47 MM: [mandar5670@gmail.com](mailto:mandar5670@gmail.com)  
48 PG: [pgoswami@fhi360.org](mailto:pgoswami@fhi360.org)  
49 DY: [yadavdiwakar7@gmail.com](mailto:yadavdiwakar7@gmail.com)  
50 SS: [SSen@fhi360.org](mailto:SSen@fhi360.org)  
51 BG: [BGeorge@fhi360.org](mailto:BGeorge@fhi360.org)  
52 HR: [drharikumar1959@yahoo.co.in](mailto:drharikumar1959@yahoo.co.in)  
53 TS: [thilakavathi\\_s@rediffmail.com](mailto:thilakavathi_s@rediffmail.com)  
54 RSP: [rparanjape@nariindia.org](mailto:rparanjape@nariindia.org)  
55  
56  
57  
58  
59  
60

1  
2  
3 **Keywords:** clients of female sex workers, FSW, anal intercourse, condom use, HIV, STI, India,  
4  
5 Maharashtra, Tamil Nadu, Andhra Pradesh  
6  
7

8  
9 **Word count:** 3004 (Introduction, methods, results and conclusion)  
10  
11

### 12 13 **Competing interests**

14  
15 None declared  
16  
17

### 18 19 **Acknowledgement**

20  
21  
22  
23 The authors wish to thank the Avahan state implementation partners for their partnership in this  
24  
25 study. We thank Dr. Stephen Schensul, Dr. Niranjan Saggurti and Dr. Bidhu Bhushan Mahapatra  
26  
27 for providing critical inputs during concept development and analysis. We also extend our  
28  
29 gratitude to Dr. Steve Mills from FHI 360, Asia Pacific Regional Office, Bangkok, Thailand, for  
30  
31 his inputs in the finalization of this manuscript. Finally, we thank the respondents for their  
32  
33 participation in the study.  
34  
35

36  
37 An earlier version (abstract) of this research paper was presented at the STI & AIDS World  
38  
39 Congress 2013 in Vienna, Austria.  
40  
41  
42

### 43 44 **Funding**

45  
46 The Bill & Melinda Gates Foundation funded this research through Avahan: the India AIDS  
47  
48 Initiative. The views expressed herein are those of the authors and do not necessarily reflect the  
49  
50 official policy or position of the foundation and Avahan.  
51  
52  
53  
54  
55  
56  
57  
58  
59  
60

### **Ethics approval**

Clearance for the study was taken from ethics committees of the participating institutes of Indian Council of Medical Research (National AIDS Research Institute, Pune; National Institute of Nutrition, Hyderabad; and National Institute of Epidemiology, Chennai) and FHI 360 (Protection of Human Subjects Committee).

### **Data sharing statement**

IBBA Round 1 (2005-07) and Round 2 (2009-2010) data are available on request from the National AIDS Research Institute (NARI). The request form can be accessed from:

[http://www.nari-icmr.res.in/pdf/IBBA/Agreement-for-accessing-raw-IBBA%20\\_R1-&-R2\\_data.pdf](http://www.nari-icmr.res.in/pdf/IBBA/Agreement-for-accessing-raw-IBBA%20_R1-&-R2_data.pdf)

Other IBBA-related documents are available at:

[www.ibbainfo.in](http://www.ibbainfo.in)

### **Abstract**

#### **Objectives**

Recent studies from India have documented varying estimates of self-reported anal intercourse (ranging 3% to 80%) by female sex workers (FSWs). However, comparable data on anal intercourse and condom use from male clients of FSWS is lacking. Using data from a bio-behavioural survey (2009–2010), we examined prevalence of anal intercourse, male clients' self-reported inconsistent condom use during anal intercourse with FSWS, and correlates of this

1  
2  
3 behavior in three of India's high-prevalence states — Andhra Pradesh, Maharashtra and Tamil  
4  
5 Nadu.  
6  
7

## 8 9 10 **Methods**

11  
12 Using two-stage time location cluster sampling, we recruited 4,803 clients of FSWs, ages 18–60  
13  
14 years, who had purchased sex from an FSW in the past month. After obtaining informed consent,  
15  
16 respondents were interviewed and tested for HIV and STIs (syphilis, gonorrhoea and chlamydia).  
17  
18 Logistic regression analysis was used to identify the factors associated with inconsistent condom  
19  
20 use during anal intercourse (in the past six months) with FSWs.  
21  
22  
23  
24  
25  
26

## 27 **Results**

28  
29 Overall, 12.4% clients reported anal intercourse in the past six months, of which 48.4% used  
30  
31 condoms inconsistently. Clients of FSWs who were ages 26 years or older (AOR: 2.68,  $p=0.032$ );  
32  
33 employed as manual laborers (AOR: 2.43,  $p=0.013$ ); consumed alcohol (AOR: 2.63,  $p=0.001$ ),  
34  
35 reported five or more sex acts with FSWs in the past month (AOR: 2.53,  $p=0.031$ ) and perceived  
36  
37 themselves to be at higher risk for HIV (AOR: 4.82,  $p=0.001$ ) were more likely to inconsistently  
38  
39 use condoms during anal intercourse.  
40  
41  
42  
43

## 44 **Conclusion**

45  
46 The results suggest that sex workers and their clients commonly practice anal intercourse, but a  
47  
48 relatively high proportion of clients do not consistently use condoms, leading to a greater risk of  
49  
50 acquiring HIV and its further transmission to other male and female sexual partners. Given the  
51  
52 multidirectional risk, safer sex communication on heterosexual anal intercourse must be  
53  
54 incorporated into HIV prevention programs.  
55  
56  
57  
58  
59  
60

## Article summary

This paper discusses the prevalence of anal intercourse, male clients' self-reported inconsistent condom use during anal intercourse with FSWs, and correlates of this behavior in Andhra Pradesh, Maharashtra and Tamil Nadu.

## Key messages

- Sex workers and their clients commonly practice anal intercourse, but a relatively high proportion of clients do not consistently use condoms, resulting in a greater risk of acquiring HIV and its further transmission to other male and female sexual partners.
- Safer sex messages on heterosexual anal intercourse should be incorporated into HIV prevention interventions for both FSWs and their clients.

## Strengths and limitations of this study

- Using data from a large scale multi-site bio-behavioral survey, this paper discusses the prevalence and practice of unprotected anal intercourse among clients of sex workers in three high HIV prevalence states of India.
- Both anal intercourse and condom use are self-reported measures and may therefore be influenced by the social desirability bias, resulting in under or over reporting of the phenomena.

## Introduction

Heterosexual anal intercourse (HAI) is an understudied risk behavior among clients of female sex workers (CFSWs), a vulnerable population that has been identified as a critical bridge group in HIV transmission.<sup>1 2</sup> HAI has thus far received little attention, even though depictions of heterosexual anal intercourse can be found in art and artifacts dating to antiquity.<sup>3</sup> The silence on this front is perhaps linked to society's discomfort with HAI, coupled with the notion that anal intercourse is a homosexual male practice, not heterosexual.<sup>3 4</sup> Most HIV transmission in India occurs through heterosexual networks<sup>5 6</sup>, and unprotected, heterosexual transactional sex plays a central role in the spread of HIV.<sup>7</sup> Previous studies indicate that condom usage is higher for vaginal intercourse than for heterosexual anal sex.<sup>8 9</sup> Furthermore, studies have documented condom breakage when condoms were used during anal intercourse, thereby increasing chances of infection.<sup>10-12</sup> While behavioral interventions targeting FSWs have substantially reduced HIV prevalence in general, the FSWs' HIV and STI vulnerability remains high due to the increasing trend of risky behaviors, such as unprotected anal intercourse with clients.<sup>13 14</sup>

Given the high vulnerabilities associated with HAI in commercial and non-commercial sex settings, a few research studies have assessed anal intercourse prevalence and associated factors among FSWs and the general population.<sup>15-17</sup> Similar to findings from other countries in commercial sex settings, studies on FSWs in India have also documented increased trend for anal intercourse with clients.<sup>13 14 18</sup> Varying estimates of anal intercourse prevalence have been documented in India, ranging from 3 to 80.<sup>13 18 19</sup> In India and elsewhere, the primary reason for FSWs selling anal sex is the extra money it brings from clients. It is also linked to associated factors such as economic hardship, debt status and lack of alternate source of income.<sup>14 18</sup> Anal intercourse is usually demand driven, not preferred by FSWs and at times even forced by clients

1  
2  
3 through violence.<sup>15 18 20 21</sup> Both intervention and research in the area are extensive among FSWs.  
4  
5 However, there is paucity of behavioral research on clients' self-reported anal intercourse and  
6  
7 condom use during anal intercourse. This paper examines the correlates of clients' inconsistent  
8  
9 condom use during anal intercourse with FSWs. The study has used cross-sectional survey data  
10  
11 collected from clients of FSW in three high HIV prevalence states of India.  
12  
13

## 14 15 16 **Materials and Methods**

### 17 18 19 *Data source*

20  
21  
22 Data were derived from a cross-sectional bio-behavioural survey (called integrated behavioral  
23  
24 and biological assessment [IBBA]) that was conducted among clients of FSWs as part of the  
25  
26 evaluation of a large-scale HIV prevention program in 12 districts across the three Indian states  
27  
28 of Andhra Pradesh, Maharashtra and Tamil Nadu during 2009–2010. Men, of ages 18–60 years,  
29  
30 who reported purchasing sex from an FSW in the past month, were considered eligible  
31  
32 respondents. These eligible respondents were identified with the help of FSWs, brokers, pimps,  
33  
34 etc., at places of FSW solicitation/entertainment and recruited for the study. The survey used a  
35  
36 two-stage cluster sampling design with time location clusters (TLCs) as primary sampling units.  
37  
38 Clusters were randomly selected by using probability proportional to size (PPS) in the first stage.  
39  
40 From these selected clusters, respondents were then selected through systematic random  
41  
42 sampling in the second stage. Behavioral information was collected through a structured,  
43  
44 interviewer-administered questionnaire, and blood and urine samples were collected to test for  
45  
46 HIV and other STIs (gonorrhoea, chlamydia, syphilis). A detailed description of the survey  
47  
48 methodology is available elsewhere.<sup>22</sup>  
49  
50  
51  
52  
53  
54  
55  
56  
57  
58  
59  
60

1  
2  
3 Prior oral or written informed consent was obtained from all respondents. The survey was  
4  
5 approved by the ethics committees of the participating institutes of Indian Council of Medical  
6  
7 Research (National AIDS Research Institute, Pune; National Institute of Nutrition, Hyderabad;  
8  
9 and National Institute of Epidemiology, Chennai) and FHI 360 (Protection of Human Subjects  
10  
11 Committee).  
12  
13

### 14 15 16 17 18 *Conceptual framework* 19

20  
21 For the current analysis, a conceptual framework (Figure 1, illustrated below) was used as a  
22  
23 device to explain and identify the different factors that may be associated with inconsistent  
24  
25 condom use during anal intercourse with FSWs.  
26  
27

28  
29 Inconsistent condom use during anal intercourse was the dependent variable. The independent  
30  
31 variables were selected based on their contextual relation with the dependent variable. Based on  
32  
33 prior research, individual factors such as risk perception, alcohol use,<sup>23-25</sup> frequency of  
34  
35 commercial sex, volume of sex acts,<sup>14 26</sup> having male/transgender partners,<sup>27</sup> place of soliciting  
36  
37 FSWs<sup>5</sup> and having HIV/STIs,<sup>18</sup> which are widely seen to influence condom use among different  
38  
39 high-risk population groups, were included. We hypothesized that clients who were married,  
40  
41 consumed alcohol, solicited FSWs from public places and had a higher number of FSW partners  
42  
43 were more likely to be inconsistent condom users. These clients were also more likely to have  
44  
45 experienced anal sex with a man. Most current interventions for clients of FSWs are limited to  
46  
47 condom promotion and distribution, and no intervention for FSWs or their clients currently  
48  
49 addresses heterosexual anal intercourse, which has significant implications for HIV prevention  
50  
51 programming.  
52  
53  
54  
55  
56  
57  
58  
59  
60



1  
2  
3 Based on the rationale described above, we grouped the different indicators into two categories:  
4  
5 a) socio-demographic and b) HIV-related sexual risk behaviors.  
6  
7

### 8 ***Measures***

#### 9 *Dependent variable:*

10  
11  
12 Inconsistent condom use during anal intercourse - This behavior was assessed by asking: “How  
13  
14 often did you use a condom while having anal intercourse with your regular and occasional  
15  
16 FSWs in the past six months?” The clients who reported using condoms most of the time,  
17  
18 sometimes or never were considered inconsistent condom users (coded as ‘1’), while those who  
19  
20 reported using condoms every time during anal intercourse were considered consistent condom  
21  
22 users (coded as ‘0’).  
23  
24  
25  
26  
27  
28  
29  
30  
31  
32

#### 33 *Independent variables:*

34  
35  
36 The independent variables included age in completed years; education (illiterate, can read only,  
37  
38 can read and write); occupation (pre-coded as unemployed, student, domestic servant,  
39  
40 agricultural labor, non-agricultural/casual labor, skilled/semi-skilled labor, petty  
41  
42 businessman/shop owner, large businessman/shop owner, bus/truck drivers/helpers, other  
43  
44 transport workers, service and others); marital status (currently married, separated, divorced,  
45  
46 widowed, never married, no answer); place of soliciting FSWs (pre-coded as bar/night club,  
47  
48 public place, street, park, railway station, agent, brothel, hotel/lodge, home, *dhaba*, by telephone,  
49  
50 other); number of FSWs had sex with in the past month; number of sex acts with FSWs in the  
51  
52 past month; ever had anal intercourse with a man/transgender (yes/no); self-risk perception  
53  
54  
55  
56  
57  
58  
59  
60

1  
2  
3 (yes/no); alcohol consumption (everyday, at least once a week, less than once a week, never, no  
4  
5 answer); and having HIV or any STI (those having HIV, syphilis, gonorrhoea or chlamydia were  
6  
7 grouped into positive and the rest as negative).  
8  
9

10  
11 Given the skewed distribution, all the variables were dichotomized for the analysis. Age was  
12  
13 categorized into  $\leq 25$  years and 26 years or older; education was grouped into literate and  
14  
15 illiterate; occupation into laborers (manual) and non-laborers, marital status as currently married  
16  
17 and never married/widowed/separated/divorced; place of soliciting FSWs into public place and  
18  
19 non-public place; number of FSWs had sex with as  $\leq 3$  FSWs and  $\geq 4$  FSWs; number of sex acts  
20  
21 as  $\leq 4$  times and  $\geq 5$  times; and alcohol use into frequent and infrequent drinkers.  
22  
23  
24  
25

### 26 *Statistical analysis*

27  
28  
29 Descriptive statistics were calculated and used to measure the levels of inconsistent condom use  
30  
31 (during anal intercourse) and other selected variables. Chi-square tests were used to assess the  
32  
33 significance of bivariate relationships between demographic characteristics of clients and their  
34  
35 condom use behaviour during anal intercourse. Multiple logistic regression model was used to  
36  
37 identify factors that were independently predictive of inconsistent condom use during anal  
38  
39 intercourse, with adjusted odds ratio calculated at a significance level less than 0.05. Statistical  
40  
41 calculations were conducted using aggregated data of clients of FSWs from all three states, since  
42  
43 the eligibility criteria for respondents and the methods of sampling and behavioural data  
44  
45 collection were standardized and same in all the three states. Analysis was done by applying  
46  
47 appropriate weights. At the district level, weighting was based on the cluster effect of the sample.  
48  
49 At the aggregate level, standardized weights were calculated by combining the 12 districts.  
50  
51 STATA/SE version 11® (Stata Corporation, College Station, TX) was used for all the analyses.  
52  
53  
54  
55  
56  
57  
58  
59  
60

## Results

Of the 4,803 clients of FSWs (Andhra Pradesh (n=2016), Tamil Nadu (n=1217), and Maharashtra (n=1570), 12.4% reported having had anal intercourse in the past six months; 48.4% among them used condoms inconsistently during anal intercourse. In Andhra Pradesh, Maharashtra and Tamil Nadu those reporting anal sex were 19.1%, 6.6% and 17.7% respectively (Data not shown in table). Condom use during anal and vaginal sex varied widely in the different states. 75.5% clients in Andhra Pradesh, 16.2% in Maharashtra and 8.2% in Tamil Nadu reported using condoms consistently during anal sex with FSW. In contrast, the reported condom use during vaginal sex was nearly 50% in Tamil Nadu, 40% in Andhra Pradesh and 10.5% in Maharashtra (Data not shown in table).

As presented in Table 1, the bivariate analysis shows that the majority of inconsistent condom users were ages 26 years or older (84.3%), married (79.8 %) and solicited FSWs from public places (77.1 %). Literacy levels were lower among inconsistent condom users than among consistent condom users (50.0 % vs. 85.2 %,  $p=0.003$ ). Similarly, a lower proportion of inconsistent condom users reported having had anal intercourse with a man than consistent condom users (18.7 % vs. 39.4 %,  $p=0.022$ ). A higher proportion of inconsistent condom users consumed alcohol frequently (56.0 % vs. 37.5%,  $p=0.031$ ) and considered themselves at risk of exposure to HIV than consistent condom users (47.9 % vs. 7.13 %,  $p=0.000$ ). More than 30 % inconsistent condom users tested positive for HIV/STI, compared to a smaller proportion of consistent condom users (32.3 % vs. 9.7 %,  $p=0.085$ ), but the association is not significant.

Table 2 shows the independent factors associated with inconsistent condom use during anal intercourse with FSWs. Clients of FSWs who were ages 26 years or older (AOR: 2.68,  $p=0.032$ ),

1  
2  
3 employed as manual laborers (AOR: 2.43, p=0.013), consumed alcohol (AOR: 2.63, p=0.001),  
4 reported five or more sex acts with FSWs in the past month (AOR: 2.53, p=0.031), and perceived  
5 themselves to be at higher risk for HIV (AOR: 4.82, p=0.001) were more likely to inconsistently  
6 use condoms during anal intercourse than their counterparts. On the other hand, clients who were  
7 currently married (AOR: 0.41, p=0.056) and had sex with more number of FSWs ( $\geq 4$  and above)  
8 in the past month were less likely to inconsistently use condoms during anal intercourse than  
9 those never married/separated/divorced/widowed and who had sex with less than three FSWs.  
10 Testing positive for HIV or STI was not found to be associated with inconsistency in condom use  
11 during anal intercourse. Similarly, factors such as literacy level, place where the client solicited  
12 FSWs and whether he had had anal sex with a male/hijra partner were not associated with  
13 inconsistency in condom use during anal intercourse.  
14  
15  
16  
17  
18  
19  
20  
21  
22  
23  
24  
25  
26  
27  
28  
29  
30  
31  
32

### 33 Discussion

34  
35  
36 IBBA, one of the few surveys in India to study large samples of clients of FSWs, has  
37 documented the practice of unprotected anal intercourse in three high HIV prevalence states of  
38 the country. Its findings show that anal intercourse is a substantial part of the commercial sex  
39 activity in India, with about 12 percent clients reporting experience of anal intercourse and  
40 nearly half of them not using condoms during anal intercourse with FSWs. The profile of clients  
41 who reported having unprotected anal intercourse with FSW varied from clients who did not  
42 report unprotected sex. Clients who were 26 years or older, frequently used alcohol, worked as  
43 manual laborers and reported higher number of sex acts with FSWs were at an increased risk of  
44 unprotected anal intercourse.  
45  
46  
47  
48  
49  
50  
51  
52  
53  
54  
55  
56  
57  
58  
59  
60

1  
2  
3 In the absence of comparable estimates on anal intercourse from client surveys in India, we  
4  
5 examined the estimates available from studies on FSWs.<sup>13 14 18</sup> It was apparent that there is a high  
6  
7 demand for anal sex. When compared with the prevalence reported by previous FSW studies, the  
8  
9 prevalence estimated in the current analysis seems to be much lower. Anal sex is certainly  
10  
11 stigmatized among FSWs and they have a reason to under report condom use. However, we  
12  
13 don't know if it is similar for men and this was not measured and is a major limitation.  
14  
15  
16

17  
18 The finding that older clients are at a higher risk of inconsistent condom use has been reported  
19  
20 previously. Inconsistent condom use during vaginal intercourse with FSWs was found to be  
21  
22 significantly associated with older clients.<sup>2</sup> The average age of marriage for Indian men is  
23  
24 documented to be 26 years, and a majority of men (clients of FSWs) in this sample were married.  
25  
26 A possible explanation for this risky behavior among older men could be the need to fulfill  
27  
28 sexual desires or experimentation, followed by the belief that paying for sex would be less  
29  
30 troublesome and more entertaining than sexual involvement with a non-sex worker.<sup>28</sup> It could  
31  
32 also be plausible that inability of the older men to maintain erections may have resulted in  
33  
34 inconsistent use of condoms during anal sex when compared to younger men. Older men who  
35  
36 have sex with men have also been found to practice risky sexual behavior like inconsistent  
37  
38 condom use.<sup>29</sup>  
39  
40  
41  
42  
43

44 Likewise, clients who were manual laborers were more likely to be inconsistent condom users,  
45  
46 compared to those in other occupations (white collar workers). The manual laborers in the  
47  
48 current study include agricultural and non-agricultural laborers and cultivators. It is possible that  
49  
50 many of these men migrated for work and stay away from their families. Additional analysis was  
51  
52 undertaken to understand this dimension better; more than 50 % respondents reported travelling  
53  
54 in the past one year, primarily for work. These men also reported buying sex from FSWs. Given  
55  
56  
57  
58  
59  
60

1  
2  
3 this scenario, it is imperative that tailored interventions be designed for those involved in manual  
4 labor, who are often difficult to engage in prevention programs. These men could be captured  
5 through networks of labor contractors and migrant populations. Educational campaigns and  
6 counseling are also important to promote condom use for all partners and all types of sex.  
7  
8

9  
10 Our study also found that clients with higher self-perceived risk for HIV were more likely to be  
11 inconsistent condom users. Such an association could be attributed to the fact that knowledge  
12 and perceptions about safe or risky sex may not be sufficient to change an individual's behavior  
13 until self-efficacy and determination in executing a behavior or action are present.<sup>30</sup> Studies that  
14 have used the self-efficacy model among heterosexually active students have documented that  
15 risk perceptions have no influence over condom use, as was noted in this study.<sup>8 31</sup> Another  
16 plausible reason could be the lack of targeted interventions for clients, which, if present, could  
17 have inculcated a sense of responsibility toward their sexual partners.  
18  
19  
20  
21  
22  
23  
24  
25  
26  
27  
28  
29  
30  
31

32 Men who consume alcohol have been found more likely to engage in unprotected sex and anal  
33 sex and have more than 10 FSW partners.<sup>32</sup> A similar association was observed in our study,  
34 where clients who consumed alcohol frequently and reported five or more sexual encounters  
35 were found to inconsistently use condoms during anal intercourse. It seems that the survey has  
36 been able to capture high-risk clients, who have higher volume of sex acts with FSWs, engage in  
37 anal intercourse and do not use condoms. Alcohol use and its association with HIV-related  
38 sexual risk is well documented.<sup>32-34</sup> HIV prevention interventions must address this important  
39 issue linked with compromise in safe sex practices/behavior. There is a clear need for HIV  
40 prevention interventions tailored to provide information on alcohol related sexual risk.  
41  
42  
43  
44  
45  
46  
47  
48  
49  
50  
51  
52  
53

54 Although studies from the early 1990s have highlighted anal intercourse as a risk factor for  
55 HIV,<sup>9 35</sup> most AIDS prevention messages targeting heterosexuals continue to focus only on  
56  
57  
58  
59  
60

1  
2  
3 vaginal and oral sex transmission. Cultural taboos have possibly played a major role against  
4  
5 acknowledging anal sexual practice. Research on vulnerable populations, including FSWs and  
6  
7 youth, indicate that the persons particularly at risk of being infected by or transmitting HIV are  
8  
9 more likely to practice anal intercourse.<sup>36</sup> Furthermore, people with experience in anal  
10  
11 intercourse have been found to take more sexual risk when engaging in vaginal intercourse than  
12  
13 those without anal experience.<sup>8</sup> Another important aspect is the condom negotiating ability of sex  
14  
15 workers with clients. Factors in the physical, economic and policy environment influence  
16  
17 condom use. In addition, the gendered power dynamics and the lack of choice sex workers have  
18  
19 with heterosexual anal intercourse exacerbates their vulnerability. Sex workers need to be  
20  
21 empowered to negotiate condom use with clients and motivate unwilling clients to use condoms  
22  
23 during anal/vaginal sex.<sup>37</sup>  
24  
25  
26  
27  
28  
29  
30  
31  
32

### 33 **Limitations of the study**

34  
35  
36 Our study has its limitations. For one, both anal intercourse and condom use are self-reported  
37  
38 measures and may, therefore, be influenced by the social desirability bias. As indicated by  
39  
40 previous research, the social desirability bias gives rise to the possibility of underreporting.  
41  
42 Given the difficulty in evaluating the magnitude of underreporting, we must be cautious in  
43  
44 concluding that anal intercourse is practiced at relatively low rates among this population.  
45  
46 Another limitation is that the analysis included only those clients who having reported anal sex  
47  
48 which is a small fraction of the total number of clients. Further, we did not have information on  
49  
50 anal intercourse with regular female partners to establish concurrency or multidirectional risk  
51  
52 during anal intercourse. Also, the survey did not gather information on violence/coercion during  
53  
54  
55  
56  
57  
58  
59  
60

1  
2  
3 anal sex. Future studies need to address these gaps. In addition, qualitative studies are needed to  
4  
5 better understand the context in which anal intercourse occurs. In spite of these limitations, this  
6  
7 is one of the first studies to document for the clients of FSWs the practice of anal intercourse and  
8  
9 the correlates of condom use during anal intercourse.  
10  
11

## 12 13 **Conclusions**

14  
15  
16  
17 The study indicates that HIV prevention programs targeting FSWs and their clients must  
18  
19 highlight the increased risk unprotected anal intercourse poses for both self and partners.  
20  
21 Condoms and water-based lubricants need to be marketed to reduce these risks. Interventions  
22  
23 also need to address factors that influence condom negotiation ability of sex workers. Given the  
24  
25 multidirectional risk, condom promotion programs must be extended to include specific  
26  
27 information on the benefits of consistent condom use while engaging in anal and other types of  
28  
29 sex. Safer sex messages addressing heterosexual anal intercourse need to be incorporated into  
30  
31 HIV prevention interventions for both FSWs and their clients. Current prevention programs fail  
32  
33 to address this issue. Greater emphasis in AIDS/STI prevention must be given to this typically  
34  
35 stigmatized and underreported sexual practice.  
36  
37  
38  
39  
40  
41  
42

## 43 **Contributors**

44  
45  
46 SR and KN contributed to concept development, data analysis and interpretation, and writing and  
47  
48 finalization of the manuscript. LR, PG, DY, SS, BG, HR, TS, and RSP contributed to concept  
49  
50 design, review and finalization of the manuscript.  
51  
52  
53  
54  
55  
56  
57  
58  
59  
60



## References:

1. National AIDS Control Organisation MoHaFW, Government of India. 2006. New Delhi, National Behavioural Surveillance Survey (BSS)-Female Sex Workers (FSWs) and their Clients.
2. Subramanian T, Gupte MD, Paranjape RS, et al. HIV, sexually transmitted infections and sexual behaviour of male clients of female sex workers in Andhra Pradesh, Tamil Nadu and Maharashtra, India: results of a cross-sectional survey. *AIDS* 2008 **22** ( 5):S69-79. .
3. McBride KR, Fortenberry JD. Heterosexual anal sexuality and anal sex behaviors: a review. *Journal of sex research* 2010;**47**(2):123-36.
4. Voeller B. AIDS and heterosexual anal intercourse. (0004-0002 (Print)).
5. Suryawanshi D, Bhatnagar T, Deshpande S, et al. Diversity among Clients of Female Sex Workers in India: Comparing Risk Profiles and Intervention Impact by Site of Solicitation. Implications for the Vulnerability of Less Visible Female Sex Workers. *PloS one* 2013;**8**(9):e73470.
6. National AIDS Control Organisation MoHaFW, Government of India. HIV Sentinel Surveillance 2010-11: A Technical Brief. New Delhi, 2012.
7. Samet JH, Pace CA, Cheng DM, et al. Alcohol use and sex risk behaviors among HIV-infected female sex workers (FSWs) and HIV-infected male clients of FSWs in India. *AIDS Behav* 2010;**14** (1):S74-83.
8. Baldwin JI, Baldwin JD. Heterosexual anal intercourse: an understudied, high-risk sexual behavior. *Archives of sexual behavior* 2000;**29**(4):357-73.
9. Halperin DT. Heterosexual anal intercourse: prevalence, cultural factors, and HIV infection and other health risks, Part I. *AIDS patient care and STDs* 1999;**13**(12):717-30.
10. Bradley J, Rajaram S, Moses S, et al. Female sex worker client behaviors lead to condom breakage: a prospective telephone-based survey in Bangalore, South India. *AIDS and behavior* 2013;**17**(2):559-67.
11. Priddy FH, Wakasiaka S, Hoang TD, et al. Anal sex, vaginal practices, and HIV incidence in female sex workers in urban Kenya: implications for the development of intravaginal HIV prevention methods. *AIDS research and human retroviruses* 2011;**27**(10):1067-72.
12. Bradley J, Rajaram S, Alary M, et al. Determinants of condom breakage among female sex workers in Karnataka, India. *BMC public health* 2011;**11 Suppl 6**:S14.
13. Beattie TS, Bradley JE, Vanta UD, et al. Vulnerability re-assessed: the changing face of sex work in Guntur district, Andhra Pradesh. *AIDS care* 2013;**25**(3):378-84.
14. Tucker S, Krishna R, Prabhakar P, et al. Exploring dynamics of anal sex among female sex workers in Andhra Pradesh. *Indian journal of sexually transmitted diseases* 2012;**33**(1):9-15.
15. Schwandt M Fau - Morris C, Morris C Fau - Ferguson A, Ferguson A Fau - Ngugi E, et al. Anal and dry sex in commercial sex work, and relation to risk for sexually transmitted infections and HIV in Meru, Kenya. *Sex Transm Infect* 2006 (1368-4973 (Print)).
16. Heywood W, Smith AM. Anal sex practices in heterosexual and male homosexual populations: a review of population-based data. *Sexual health* 2012;**9**(6):517-26.
17. Veldhuijzen NJ IC, Luchters S, Bosire W, Braunstein S, Chersich M, van de Wijgert J. Anal intercourse among female sex workers in East Africa is associated with other high-risk behaviours for HIV. *Sex Health* 2011 **8**(2):251-4.
18. Patra RK, Mahapatra B, Kovvali D, et al. Anal sex and associated HIV-related sexual risk factors among female sex workers in Andhra Pradesh, India. *Sexual health* 2012;**9**(5):430-7.
19. M. A. A Blind Spot in HIV prevention-Female Anal Sex.

- 1
  - 2
  - 3
  - 4
  - 5
  - 6
  - 7
  - 8
  - 9
  - 10
  - 11
  - 12
  - 13
  - 14
  - 15
  - 16
  - 17
  - 18
  - 19
  - 20
  - 21
  - 22
  - 23
  - 24
  - 25
  - 26
  - 27
  - 28
  - 29
  - 30
  - 31
  - 32
  - 33
  - 34
  - 35
  - 36
  - 37
  - 38
  - 39
  - 40
  - 41
  - 42
  - 43
  - 44
  - 45
  - 46
  - 47
  - 48
  - 49
  - 50
  - 51
  - 52
  - 53
  - 54
  - 55
  - 56
  - 57
  - 58
  - 59
  - 60
20. Allen B, Cruz-Valdez A, Rivera-Rivera L, et al. [Affection, kisses, and condoms: the ABC of sexual practices of female sex workers in Mexico City]. *Salud publica de Mexico* 2003;**45 Supp 5**:S594-607.
21. Decker Mr Fau - McCauley HL, McCauley HI Fau - Phuengsamran D, Phuengsamran D Fau - Janyam S, et al. Violence victimisation, sexual risk and sexually transmitted infection symptoms among female sex workers in Thailand. (1472-3263 (Electronic)).
22. Saidel T, Adhikary R, Mainkar M, et al. Baseline integrated behavioural and biological assessment among most at-risk populations in six high-prevalence states of India: design and implementation challenges. *AIDS (London, England)* 2008;**22**:S17-S34 10.1097/01.aids.0000343761.77702.04.
23. Myers T, Rowe CJ, Tudiver FG, et al. HIV, substance use and related behaviour of gay and bisexual men: an examination of the talking sex project cohort. *British journal of addiction* 1992;**87**(2):207-14.
24. Mimiaga MJ, Thomas B, Mayer KH, et al. Alcohol use and HIV sexual risk among MSM in Chennai, India. *International journal of STD & AIDS* 2011;**22**(3):121-5.
25. Greene E, Frye V, Mansergh G, et al. Correlates of unprotected vaginal or anal intercourse with women among substance-using men who have sex with men. *AIDS and behavior* 2013;**17**(3):889-99.
26. Mahapatra B, Lowndes CM, Mohanty SK, et al. Factors associated with risky sexual practices among female sex workers in Karnataka, India. *PloS one* 2013;**8**(4):e62167.
27. Grov C, Wolff M, Smith MD, et al. Male Clients of Male Escorts: Satisfaction, Sexual Behavior, and Demographic Characteristics. *Journal of sex research* 2013.
28. Pitts MK, Smith Am Fau - Grierson J, Grierson J Fau - O'Brien M, et al. Who pays for sex and why? An analysis of social and motivational factors associated with male clients of sex workers. (0004-0002 (Print)).
29. Ramanathan S, Chakrapani V, Ramakrishnan L, et al. Consistent condom use with regular, paying, and casual male partners and associated factors among men who have sex with men in Tamil Nadu, India: findings from an assessment of a large-scale HIV prevention program. *BMC public health* 2013;**13**(1):827.
30. Bandura A. Perceived self-efficacy in the exercise of control over AIDS infection. *Evaluation and Program Planning* 1990;**13**(1):9-17.
31. Wulfert E WC. Condom use: a self-efficacy model. *Health Psychol* 1993 **12**(5):346-53.
32. Madhivanan P HA, Gogate A, Stein E, Gregorich S, Setia M, Kumta S, Ekstrand M, Mathur M, Jerajani H, Lindan CP. Alcohol use by men is a risk factor for the acquisition of sexually transmitted infections and human immunodeficiency virus from female sex workers in Mumbai, India. *Sexually transmitted diseases* 2005;**32**(11):685-90.
33. Schensul J, Singh SK, Gupta K, et al. Alcohol and HIV in India: A Review of Current Research and Intervention. *AIDS and behavior* 2010;**14**(1):1-7.
34. Mimiaga MJ, Thomas B, Mayer KH, et al. Alcohol use and HIV sexual risk among MSM in Chennai, India. *International journal of STD & AIDS* 2011;**22**(3):121-25.
35. Erickson PI, Bastani R, Maxwell AE, et al. Prevalence of anal sex among heterosexuals in California and its relationship to other AIDS risk behaviors. *AIDS education and prevention : official publication of the International Society for AIDS Education* 1995;**7**(6):477-93.
36. Stulhofer A, Bacak V. Is anal sex a marker for sexual risk-taking? Results from a population-based study of young Croatian adults. *Sexual health* 2011;**8**(3):384-9.
37. Bharat S, Mahapatra B, Roy S, et al. Are Female Sex Workers Able to Negotiate Condom Use with Male Clients? The Case of Mobile FSWs in Four High HIV Prevalence States of India. *PloS one* 2013;**8**(6):e68043.

**Table 1: Characteristics of clients of FSWs who reported anal intercourse (past six months) with occasional and regular FSWs and condom use**

| Characteristics                                                 | Consistent condom users<br>(n=397, 51.5%)<br>% (number) | Inconsistent condom users<br>(n=280, 48.4%)<br>% (number) | p-value |
|-----------------------------------------------------------------|---------------------------------------------------------|-----------------------------------------------------------|---------|
| State                                                           |                                                         |                                                           |         |
| Andhra Pradesh                                                  | 75.5(281)                                               | 18.2(58)                                                  | 0.000   |
| Tamil Nadu                                                      | 8.2(43)                                                 | 48.0(84)                                                  |         |
| Maharashtra                                                     | 16.2(73)                                                | 33.7(138)                                                 |         |
| Age                                                             |                                                         |                                                           |         |
| ≤25 years                                                       | 27.1 (117)                                              | 15.6 (53)                                                 | 0.165   |
| 26 years or older                                               | 72.8 (280)                                              | 84.3 (227)                                                |         |
| Education                                                       |                                                         |                                                           |         |
| Illiterate                                                      | 14.8 (64)                                               | 49.9 (57)                                                 | 0.003   |
| Literate                                                        | 85.2 (333)                                              | 50.0 (223)                                                |         |
| Marital status                                                  |                                                         |                                                           |         |
| Never married/widowed/separated/divorced                        | 29.8 (120)                                              | 20.11 (84)                                                | 0.266   |
| Currently married                                               | 70.1 (277)                                              | 79.8 (196)                                                |         |
| Occupation                                                      |                                                         |                                                           |         |
| Non-laborer (students/business/service)                         | 51.4 (214)                                              | 46.1 (90)                                                 | 0.749   |
| Manual laborer (agricultural/non-agricultural labor/cultivator) | 48.5 (181)                                              | 53.8 (190)                                                |         |
| Place solicited FSWs                                            |                                                         |                                                           |         |
| Non-public place (brothel/home/lodge/dhaba)                     | 30.6 (117)                                              | 22.9 (93)                                                 | 0.448   |
| Public place                                                    | 69.3 (278)                                              | 77.1 (186)                                                |         |
| No. of FSWs had sex with in the past one month                  |                                                         |                                                           |         |
| ≤3 FSWs                                                         | 72.3 (324)                                              | 86.4 (229)                                                | 0.088   |
| ≥ 4 FSWs and above                                              | 27.6 (73)                                               | 13.5 (51)                                                 |         |
| No. of sex acts with FSWs in the past one month                 |                                                         |                                                           |         |
| ≤ 4 times                                                       | 73.7 (285)                                              | 76.0 (184)                                                | 0.812   |
| ≥ 5 and above                                                   | 26.2 (111)                                              | 23.9 (95)                                                 |         |
| Perceive to be at high risk of exposure to HIV                  |                                                         |                                                           |         |
| No                                                              | 92.8 (337)                                              | 52.0 (188)                                                | 0.000   |
| Yes                                                             | 7.13 (39)                                               | 47.9 (82)                                                 |         |
| Alcohol user                                                    |                                                         |                                                           |         |
| Infrequent drinker                                              | 62.4 (262)                                              | 43.9 (142)                                                | 0.031   |
| Frequent drinker (everyday)                                     | 37.5 (116)                                              | 56.0 (121)                                                |         |
| Ever had anal intercourse with a man/hijra                      |                                                         |                                                           |         |
| No                                                              | 60.5 (311)                                              | 81.2 (179)                                                | 0.022   |
| Yes                                                             | 39.4 (86)                                               | 18.7 (101)                                                |         |
| Any HIV/STIs                                                    |                                                         |                                                           |         |

|          |            |            |       |
|----------|------------|------------|-------|
| Negative | 90.2 (367) | 67.6 (253) | 0.085 |
| Positive | 9.7 (30)   | 32.3 (27)  |       |

**Table 2: Independent factors associated with inconsistent condom use during anal intercourse with FSWs in multivariate analysis**

| Characteristics                                                 | Crude odds ratio (95% CI) | p-value | Adjusted odds ratio (95% CI) | p-value |
|-----------------------------------------------------------------|---------------------------|---------|------------------------------|---------|
| Age                                                             |                           |         |                              |         |
| ≤25 years                                                       | Referent                  |         | Referent                     |         |
| 26 years or older                                               | 2.00 (0.74-5.40)          | 0.170   | 2.68 (1.09-6.61)             | 0.032   |
| Education                                                       |                           |         |                              |         |
| Illiterate                                                      | Referent                  |         | Referent                     |         |
| Literate                                                        | 0.17 (0.05-0.59)          | 0.005   | 0.66 (0.28-1.56)             | 0.347   |
| Occupation                                                      |                           |         |                              |         |
| Non-laborer (student/business/service)                          | Referent                  |         | Referent                     |         |
| Manual laborer (agricultural/non-agricultural labor/cultivator) | 1.23 (0.33-4.48)          | 0.749   | 2.43 (1.21-4.90)             | 0.013   |
| Marital status                                                  |                           |         |                              |         |
| Never married/widowed/separated/divorced                        | Referent                  |         | Referent                     |         |
| Currently married                                               | 1.69 (0.66-4.31)          | 0.269   | 0.32 (0.13-0.80)             | 0.015   |
| Place solicited FSWs                                            |                           |         |                              |         |
| Non-public place (brothel/home/lodge/dhaba)                     | Referent                  |         | Referent                     |         |
| Public place                                                    | 1.49 (0.52-4.20)          | 0.449   | 1.26 (0.60-2.61)             | 0.533   |
| No. of FSWs had sex with in the past one month                  |                           |         |                              |         |
| ≤3 FSWs                                                         | Referent                  |         | Referent                     |         |
| ≥4 FSWs and above                                               | 0.41 (0.14-1.16)          | 0.094   | 0.29 (0.10-0.84)             | 0.022   |
| No. of sex acts with FSWs in the past one month                 |                           |         |                              |         |
| ≤4 times                                                        | Referent                  |         | Referent                     |         |
| ≥5 and above                                                    | 0.88 (0.32-2.41)          | 0.812   | 2.53 (0.09-5.90)             | 0.031   |
| Perceive to be at high risk of exposure to HIV                  |                           |         |                              |         |
| No                                                              | Referent                  |         | Referent                     |         |
| Yes                                                             | 11.99 (3.08-46.5)         | 0.000   | 4.82 (1.91-12.14)            | 0.001   |
| Alcohol user                                                    |                           |         |                              |         |
| Infrequent drinker                                              | Referent                  |         | Referent                     |         |
| Frequent drinker (everyday)                                     | 2.11 (1.06-4.20)          | 0.033   | 2.63 (1.46-4.71)             | 0.001   |
| Ever had anal intercourse with a man/hijra                      |                           |         |                              |         |
| No                                                              | Referent                  |         | Referent                     |         |
| Yes                                                             | 0.35 (0.14-0.87)          | 0.025   | 0.76 (0.39-1.50)             | 0.440   |
| Any HIV/STIs                                                    |                           |         |                              |         |

|          |                   |       |                  |       |
|----------|-------------------|-------|------------------|-------|
| Negative | Referent          |       | Referent         |       |
| Positive | 4.42 (0.74-26.32) | 0.102 | 0.73 (0.25-2.12) | 0.568 |

For peer review only

1  
2  
3  
4  
5  
6  
7  
8  
9  
10  
11  
12  
13  
14  
15  
16  
17  
18  
19  
20  
21  
22  
23  
24  
25  
26  
27  
28  
29  
30  
31  
32  
33  
34  
35  
36  
37  
38  
39  
40  
41  
42  
43  
44  
45  
46  
47  
48  
49  
50  
51  
52  
53  
54  
55  
56  
57  
58  
59  
60

**Figure 1:** Conceptual framework of factors related with inconsistent condom use during anal intercourse

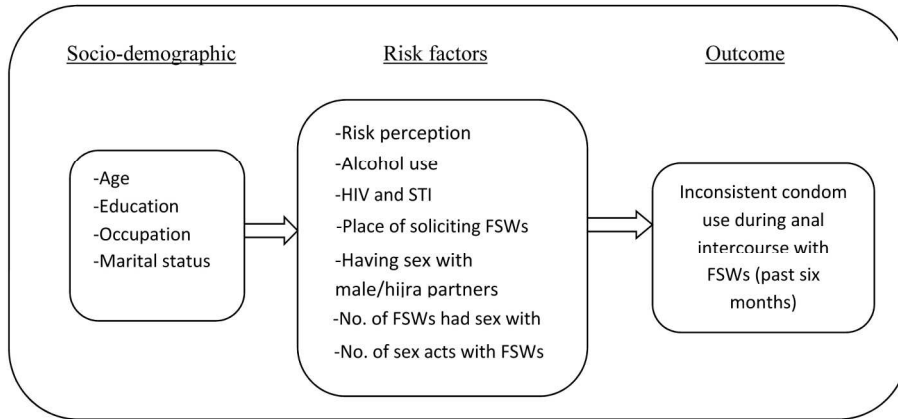

179x98mm (300 x 300 DPI)

review only

STROBE 2007 (v4) Statement—Checklist of items that should be included in reports of *cross-sectional studies*

| Section/Topic                | Item # | Recommendation                                                                                                                                                                       | Reported on page # |
|------------------------------|--------|--------------------------------------------------------------------------------------------------------------------------------------------------------------------------------------|--------------------|
| Title and abstract           | 1      | (a) Indicate the study's design with a commonly used term in the title or the abstract                                                                                               | 3                  |
|                              |        | (b) Provide in the abstract an informative and balanced summary of what was done and what was found                                                                                  | 3-4                |
| <b>Introduction</b>          |        |                                                                                                                                                                                      |                    |
| Background/rationale         | 2      | Explain the scientific background and rationale for the investigation being reported                                                                                                 | 6                  |
| Objectives                   | 3      | State specific objectives, including any pre-specified hypotheses                                                                                                                    | 7,9                |
| <b>Methods</b>               |        |                                                                                                                                                                                      |                    |
| Study design                 | 4      | Present key elements of study design early in the paper                                                                                                                              | 7,8,9              |
| Setting                      | 5      | Describe the setting, locations, and relevant dates, including periods of recruitment, exposure, follow-up, and data collection                                                      | 7,8                |
| Participants                 | 6      | (a) Give the eligibility criteria, and the sources and methods of selection of participants                                                                                          | 7,8                |
| Variables                    | 7      | Clearly define all outcomes, exposures, predictors, potential confounders, and effect modifiers. Give diagnostic criteria, if applicable                                             | 9,10               |
| Data sources/<br>measurement | 8*     | For each variable of interest, give sources of data and details of methods of assessment (measurement). Describe comparability of assessment methods if there is more than one group | 9,10               |
| Bias                         | 9      | Describe any efforts to address potential sources of bias                                                                                                                            | -                  |
| Study size                   | 10     | Explain how the study size was arrived at                                                                                                                                            | -                  |
| Quantitative variables       | 11     | Explain how quantitative variables were handled in the analyses. If applicable, describe which groupings were chosen and why                                                         | 10,11              |
| Statistical methods          | 12     | (a) Describe all statistical methods, including those used to control for confounding                                                                                                | 10,11              |
|                              |        | (b) Describe any methods used to examine subgroups and interactions                                                                                                                  | -                  |
|                              |        | (c) Explain how missing data were addressed                                                                                                                                          | -                  |
|                              |        | (d) If applicable, describe analytical methods taking account of sampling strategy                                                                                                   | -                  |
|                              |        | (e) Describe any sensitivity analyses                                                                                                                                                | -                  |
| <b>Results</b>               |        |                                                                                                                                                                                      |                    |

|                          |     |                                                                                                                                                                                                              |        |
|--------------------------|-----|--------------------------------------------------------------------------------------------------------------------------------------------------------------------------------------------------------------|--------|
| Participants             | 13* | (a) Report numbers of individuals at each stage of study—eg numbers potentially eligible, examined for eligibility, confirmed eligible, included in the study, completing follow-up, and analysed            | 11, 12 |
|                          |     | (b) Give reasons for non-participation at each stage                                                                                                                                                         | -      |
|                          |     | (c) Consider use of a flow diagram                                                                                                                                                                           | -      |
| Descriptive data         | 14* | (a) Give characteristics of study participants (eg demographic, clinical, social) and information on exposures and potential confounders                                                                     | 11, 12 |
|                          |     | (b) Indicate number of participants with missing data for each variable of interest                                                                                                                          | -      |
| Outcome data             | 15* | Report numbers of outcome events or summary measures                                                                                                                                                         | 11, 12 |
| Main results             | 16  | (a) Give unadjusted estimates and, if applicable, confounder-adjusted estimates and their precision (eg, 95% confidence interval). Make clear which confounders were adjusted for and why they were included | 11, 12 |
|                          |     | (b) Report category boundaries when continuous variables were categorized                                                                                                                                    | -      |
|                          |     | (c) If relevant, consider translating estimates of relative risk into absolute risk for a meaningful time period                                                                                             | -      |
| Other analyses           | 17  | Report other analyses done—eg analyses of subgroups and interactions, and sensitivity analyses                                                                                                               | -      |
| <b>Discussion</b>        |     |                                                                                                                                                                                                              |        |
| Key results              | 18  | Summarise key results with reference to study objectives                                                                                                                                                     | 12, 13 |
| Limitations              | 19  | Discuss limitations of the study, taking into account sources of potential bias or imprecision. Discuss both direction and magnitude of any potential bias                                                   | 15     |
| Interpretation           | 20  | Give a cautious overall interpretation of results considering objectives, limitations, multiplicity of analyses, results from similar studies, and other relevant evidence                                   | 15, 16 |
| Generalisability         | 21  | Discuss the generalisability (external validity) of the study results                                                                                                                                        | 15, 16 |
| <b>Other information</b> |     |                                                                                                                                                                                                              |        |
| Funding                  | 22  | Give the source of funding and the role of the funders for the present study and, if applicable, for the original study on which the present article is based                                                | 17     |

\*Give information separately for cases and controls in case-control studies and, if applicable, for exposed and unexposed groups in cohort and cross-sectional studies.

**Note:** An Explanation and Elaboration article discusses each checklist item and gives methodological background and published examples of transparent reporting. The STROBE checklist is best used in conjunction with this article (freely available on the Web sites of PLoS Medicine at <http://www.plosmedicine.org/>, Annals of Internal Medicine at <http://www.annals.org/>, and Epidemiology at <http://www.epidem.com/>). Information on the STROBE Initiative is available at [www.strobe-statement.org](http://www.strobe-statement.org).



# BMJ Open

## Inconsistent condom use by male clients during anal intercourse with occasional and regular female sex workers (FSWs): Survey findings from southern states of India

|                                 |                                                                                                                                                                                                                                                                                                                                                                                                                                                                                                                                                                                                                                                                                           |
|---------------------------------|-------------------------------------------------------------------------------------------------------------------------------------------------------------------------------------------------------------------------------------------------------------------------------------------------------------------------------------------------------------------------------------------------------------------------------------------------------------------------------------------------------------------------------------------------------------------------------------------------------------------------------------------------------------------------------------------|
| Journal:                        | <i>BMJ Open</i>                                                                                                                                                                                                                                                                                                                                                                                                                                                                                                                                                                                                                                                                           |
| Manuscript ID:                  | bmjopen-2014-005166.R2                                                                                                                                                                                                                                                                                                                                                                                                                                                                                                                                                                                                                                                                    |
| Article Type:                   | Research                                                                                                                                                                                                                                                                                                                                                                                                                                                                                                                                                                                                                                                                                  |
| Date Submitted by the Author:   | 25-Sep-2014                                                                                                                                                                                                                                                                                                                                                                                                                                                                                                                                                                                                                                                                               |
| Complete List of Authors:       | Ramanathan, Shreena; FHI 360, M&E, Knowledge Network, DAKSH Nagarajan, Karikalan; National AIDS Research Institute, Knowledge Network<br>Ramakrishnan, Lakshmi; FHI 360, M&E, Knowledge Network<br>Mainkar, Mandar; Formerly with National AIDS Research Institute, Goswami, Prabuddhagopal; FHI 360, M&E<br>Yadav, Diwakar; Formerly with FHI 360, M&E<br>Sen, Shrabanti; FHI 360, M&E<br>George, Bitra; FHI 360, Country Director<br>Rachakulla, Hari; National Institute of Nutrition (NIN), Community Studies<br>Subramanian, Thilakavath; National Institute of Epidemiology (NIE), Social & Behavioural Sciences<br>Paranjape, Ramesh; National AIDS Research Institute, Immunology |
| <b>Primary Subject Heading</b>: | HIV/AIDS                                                                                                                                                                                                                                                                                                                                                                                                                                                                                                                                                                                                                                                                                  |
| Secondary Subject Heading:      | Public health                                                                                                                                                                                                                                                                                                                                                                                                                                                                                                                                                                                                                                                                             |
| Keywords:                       | Clients of sex workers, HIV/AIDS, Anal intercourse                                                                                                                                                                                                                                                                                                                                                                                                                                                                                                                                                                                                                                        |
|                                 |                                                                                                                                                                                                                                                                                                                                                                                                                                                                                                                                                                                                                                                                                           |

SCHOLARONE™  
Manuscripts

**Title: Inconsistent condom use by male clients during anal intercourse with occasional and regular female sex workers (FSWs): Survey findings from southern states of India**

**Corresponding author**

Shreena Ramanathan  
Technical Manager, M&E, Knowledge Network, DAKSH  
FHI 360, India  
H-5 (Ground Floor), Green Park Extension,  
New Delhi - 110016,  
India  
E-mail: [sramanathan@fhi360.org](mailto:sramanathan@fhi360.org)  
Ph: 91-11-40487777  
Fax: 91-11-26172646

**Co-Authors**

Karikalan Nagarajan, National AIDS Research Institute (NARI) Pune, India  
Lakshmi Ramakrishnan, FHI 360, New Delhi, India  
Mandar K Mainkar, National AIDS Research Institute (NARI) Pune, India  
Prabuddhagopal Goswami, FHI 360, New Delhi, India  
Diwakar Yadav, formerly with FHI 360, New Delhi, India  
Shrabanti Sen, FHI 360, New Delhi, India  
Bitra George, FHI 360, New Delhi, India  
Harikumar Rachakulla, National Institute of Nutrition (NIN), Hyderabad, India  
Thilakavathi Subramanian, National Institute of Epidemiology (NIE), Chennai, India  
Ramesh S. Paranjape, National AIDS Research Institute (NARI) Pune, India

**Emails:**

KN: [drkarikalan82@gmail.com](mailto:drkarikalan82@gmail.com)  
LR: [ramaklak@gmail.com](mailto:ramaklak@gmail.com)  
MM: [mandar5670@gmail.com](mailto:mandar5670@gmail.com)  
PG: [pgoswami@fhi360.org](mailto:pgoswami@fhi360.org)  
DY: [yadavdiwakar7@gmail.com](mailto:yadavdiwakar7@gmail.com)  
SS: [SSen@fhi360.org](mailto:SSen@fhi360.org)  
BG: [BGeorge@fhi360.org](mailto:BGeorge@fhi360.org)  
HR: [drharikumar1959@yahoo.co.in](mailto:drharikumar1959@yahoo.co.in)  
TS: [thilakavathi\\_s@rediffmail.com](mailto:thilakavathi_s@rediffmail.com)  
RSP: [rparanjape@nariindia.org](mailto:rparanjape@nariindia.org)

1  
2  
3 **Keywords:** clients of female sex workers, FSW, anal intercourse, condom use, HIV, STI, India,  
4  
5 Maharashtra, Tamil Nadu, Andhra Pradesh  
6  
7

8  
9 **Word count: 3004** (Introduction, methods, results and conclusion)  
10  
11

## 12 13 14 15 16 17 **Abstract**

### 18 19 **Objectives**

20  
21  
22 Recent studies from India have documented varying estimates of self-reported anal intercourse  
23  
24 (ranging 3% to 80%) by female sex workers (FSWs). However, comparable data on anal  
25  
26 intercourse and condom use from male clients of FSWs is lacking. Using data from a bio-  
27  
28 behavioural survey (2009–2010), we examined prevalence of anal intercourse, male clients' self-  
29  
30 reported inconsistent condom use during anal intercourse with FSWs, and correlates of this  
31  
32 behavior in India's high-prevalence southern states ( Andhra Pradesh, Maharashtra and Tamil  
33  
34 Nadu combined).  
35  
36  
37  
38  
39

### 40 41 **Methods**

42  
43 Using two-stage time location cluster sampling, we recruited 4,803 clients of FSWs, ages 18–60  
44  
45 years, who had purchased sex from an FSW in the past month. After obtaining informed consent,  
46  
47 respondents were interviewed and tested for HIV and STIs (syphilis, gonorrhoea and chlamydia).  
48  
49 Logistic regression analysis was used to identify the factors associated with inconsistent condom  
50  
51 use during anal intercourse (in the past six months) with FSWs.  
52  
53  
54  
55  
56  
57  
58  
59  
60

## Results

Overall, 12.4% clients reported anal intercourse in the past six months, of which 48.4% used condoms inconsistently. Clients of FSWs who were ages 26 years or older (AOR: 2.68,  $p=0.032$ ); employed as manual laborers (AOR: 2.43,  $p=0.013$ ); consumed alcohol (AOR: 2.63,  $p=0.001$ ), reported five or more sex acts with FSWs in the past month (AOR: 2.53,  $p=0.031$ ) and perceived themselves to be at higher risk for HIV (AOR: 4.82,  $p=0.001$ ) were more likely to inconsistently use condoms during anal intercourse.

## Conclusion

The results suggest that sex workers and their clients commonly practice anal intercourse, but a relatively high proportion of clients do not consistently use condoms, leading to a greater risk of acquiring HIV and its further transmission to other male and female sexual partners. Given the multidirectional risk, safer sex communication on heterosexual anal intercourse must be incorporated into HIV prevention programs.

## Article summary

This paper discusses the prevalence of anal intercourse, male clients' self-reported inconsistent condom use during anal intercourse with FSWs, and correlates of this behavior in Andhra Pradesh, Maharashtra and Tamil Nadu.

## Key messages

- Sex workers and their clients commonly practice anal intercourse, but a relatively high proportion of clients do not consistently use condoms, resulting in a greater risk of acquiring HIV and its further transmission to other male and female sexual partners.
- Safer sex messages on heterosexual anal intercourse should be incorporated into HIV prevention interventions for both FSWs and their clients.

### **Strengths and limitations of this study**

- Using data from a large scale multi-site bio-behavioral survey, this paper discusses the prevalence and practice of unprotected anal intercourse among clients of sex workers in high HIV prevalent southern states of India.
- Both anal intercourse and condom use are self-reported measures and may therefore be influenced by the social desirability bias, resulting in under or over reporting of the phenomena.

## Introduction

Heterosexual anal intercourse (HAI) is an understudied risk behavior among clients of female sex workers (CFSWs), a vulnerable population that has been identified as a critical bridge group in HIV transmission.<sup>1 2</sup> HAI has thus far received little attention, even though depictions of heterosexual anal intercourse can be found in art and artifacts dating to antiquity.<sup>3</sup> The silence on this front is perhaps linked to society's discomfort with HAI, coupled with the notion that anal intercourse is a homosexual male practice, not heterosexual.<sup>3 4</sup> Most HIV transmission in India occurs through heterosexual networks<sup>5 6</sup>, and unprotected, heterosexual transactional sex plays a central role in the spread of HIV.<sup>7</sup> Previous studies indicate that condom usage is higher for vaginal intercourse than for heterosexual anal sex.<sup>8 9</sup> Furthermore, studies have documented condom breakage when condoms were used during anal intercourse, thereby increasing chances of infection.<sup>10-12</sup> While behavioral interventions targeting FSWs have substantially reduced HIV prevalence in general, the FSWs' HIV and STI vulnerability remains high due to the increasing trend of risky behaviors, such as unprotected anal intercourse with clients.<sup>13 14</sup>

Given the high vulnerabilities associated with HAI in commercial and non-commercial sex settings, a few research studies have assessed anal intercourse prevalence and associated factors among FSWs and the general population.<sup>15-17</sup> Similar to findings from other countries in commercial sex settings, studies on FSWs in India have also documented increased trend for anal intercourse with clients.<sup>13 14 18</sup> Varying estimates of anal intercourse prevalence have been documented in India, ranging from 3 to 80.<sup>13 18 19</sup> In India and elsewhere, the primary reason for FSWs selling anal sex is the extra money it brings from clients. It is also linked to associated factors such as economic hardship, debt status and lack of alternate source of income.<sup>14 18</sup> Anal intercourse is usually demand driven, not preferred by FSWs and at times even forced by clients

1  
2  
3 through violence.<sup>15 18 20 21</sup> Both intervention and research in the area are extensive among FSWs.  
4  
5 However, there is paucity of behavioral research on clients' self-reported anal intercourse and  
6  
7 condom use during anal intercourse. This paper examines the correlates of clients' inconsistent  
8  
9 condom use during anal intercourse with FSWs. The study has used cross-sectional survey data  
10  
11 collected from clients of FSW in three high HIV prevalence states of India.  
12  
13

## 14 15 16 **Materials and Methods**

### 17 18 19 *Data source*

20  
21  
22 Data were derived from a cross-sectional bio-behavioural survey (called integrated behavioral  
23  
24 and biological assessment [IBBA]) that was conducted among clients of FSWs as part of the  
25  
26 evaluation of a large-scale HIV prevention program in 12 districts across the three Indian states  
27  
28 of Andhra Pradesh, Maharashtra and Tamil Nadu during 2009–2010. Men, of ages 18–60 years,  
29  
30 who reported purchasing sex from an FSW in the past month, were considered eligible  
31  
32 respondents. These eligible respondents were identified with the help of FSWs, brokers, pimps,  
33  
34 etc., at places of FSW solicitation/entertainment and recruited for the study. The survey used a  
35  
36 two-stage cluster sampling design with time location clusters (TLCs) as primary sampling units.  
37  
38 Clusters were randomly selected by using probability proportional to size (PPS) in the first stage.  
39  
40 From these selected clusters, respondents were then selected through systematic random  
41  
42 sampling in the second stage. Behavioral information was collected through a structured,  
43  
44 interviewer-administered questionnaire, and blood and urine samples were collected to test for  
45  
46 HIV and other STIs (gonorrhoea, chlamydia, syphilis). A detailed description of the survey  
47  
48 methodology is available elsewhere.<sup>22</sup>  
49  
50  
51  
52  
53  
54  
55  
56  
57  
58  
59  
60

1  
2  
3 Prior oral or written informed consent was obtained from all respondents. The survey was  
4  
5 approved by the ethics committees of the participating institutes of Indian Council of Medical  
6  
7 Research (National AIDS Research Institute, Pune; National Institute of Nutrition, Hyderabad;  
8  
9 and National Institute of Epidemiology, Chennai) and FHI 360 (Protection of Human Subjects  
10  
11 Committee).  
12  
13

### 14 15 16 17 *Conceptual framework* 18

19  
20 For the current analysis, a conceptual framework (Figure 1, illustrated below) was used as a  
21  
22 device to explain and identify the different factors that may be associated with inconsistent  
23  
24 condom use during anal intercourse with FSWs.  
25  
26

27  
28 Inconsistent condom use during anal intercourse was the dependent variable. The independent  
29  
30 variables were selected based on their contextual relation with the dependent variable. Based on  
31  
32 prior research, individual factors such as risk perception, alcohol use,<sup>23-25</sup> frequency of  
33  
34 commercial sex, volume of sex acts,<sup>14 26</sup> having male/transgender partners,<sup>27</sup> place of soliciting  
35  
36 FSWs<sup>5</sup> and having HIV/STIs,<sup>18</sup> which are widely seen to influence condom use among different  
37  
38 high-risk population groups, were included. We hypothesized that clients who were married,  
39  
40 consumed alcohol, solicited FSWs from public places and had a higher number of FSW partners  
41  
42 were more likely to be inconsistent condom users. These clients were also more likely to have  
43  
44 experienced anal sex with a man. Most current interventions for clients of FSWs are limited to  
45  
46 condom promotion and distribution, and no intervention for FSWs or their clients currently  
47  
48 addresses heterosexual anal intercourse, which has significant implications for HIV prevention  
49  
50 programming.  
51  
52  
53  
54  
55  
56  
57  
58  
59  
60



1  
2  
3 Based on the rationale described above, we grouped the different indicators into two categories:  
4  
5 a) socio-demographic and b) HIV-related sexual risk behaviors.  
6  
7

### 8 9 ***Measures***

#### 10 11 *Dependent variable:*

12  
13 Inconsistent condom use during anal intercourse - This behavior was assessed by asking: “How  
14  
15 often did you use a condom while having anal intercourse with your regular and occasional  
16  
17 FSWs in the past six months?” The clients who reported using condoms most of the time,  
18  
19 sometimes or never were considered inconsistent condom users (coded as ‘1’), while those who  
20  
21 reported using condoms every time during anal intercourse were considered consistent condom  
22  
23 users (coded as ‘0’).  
24  
25  
26  
27  
28  
29  
30  
31  
32

#### 33 34 *Independent variables:*

35  
36 The independent variables included age in completed years; education (illiterate, can read only,  
37  
38 can read and write); occupation (pre-coded as unemployed, student, domestic servant,  
39  
40 agricultural labor, non-agricultural/casual labor, skilled/semi-skilled labor, petty  
41  
42 businessman/shop owner, large businessman/shop owner, bus/truck drivers/helpers, other  
43  
44 transport workers, service and others); marital status (currently married, separated, divorced,  
45  
46 widowed, never married, no answer); place of soliciting FSWs (pre-coded as bar/night club,  
47  
48 public place, street, park, railway station, agent, brothel, hotel/lodge, home, *dhaba*, by telephone,  
49  
50 other); number of FSWs had sex with in the past month; number of sex acts with FSWs in the  
51  
52 past month; ever had anal intercourse with a man/transgender (yes/no); self-risk perception  
53  
54  
55  
56  
57  
58  
59  
60

1  
2  
3 (yes/no); alcohol consumption (everyday, at least once a week, less than once a week, never, no  
4  
5 answer); and having HIV or any STI (those having HIV, syphilis, gonorrhoea or chlamydia were  
6  
7 grouped into positive and the rest as negative).  
8  
9

10  
11 Given the skewed distribution, all the variables were dichotomized for the analysis. Age was  
12  
13 categorized into  $\leq 25$  years and 26 years or older; education was grouped into literate and  
14  
15 illiterate; occupation into laborers (manual) and non-laborers, marital status as currently married  
16  
17 and never married/widowed/separated/divorced; place of soliciting FSWs into public place and  
18  
19 non-public place; number of FSWs had sex with as  $\leq 3$  FSWs and  $\geq 4$  FSWs; number of sex acts  
20  
21 as  $\leq 4$  times and  $\geq 5$  times; and alcohol use into frequent and infrequent drinkers.  
22  
23  
24  
25

### 26 *Statistical analysis*

27  
28  
29 Descriptive statistics were calculated and used to measure the levels of inconsistent condom use  
30  
31 (during anal intercourse) and other selected variables. Chi-square tests were used to assess the  
32  
33 significance of bivariate relationships between demographic characteristics of clients and their  
34  
35 condom use behaviour during anal intercourse. Multiple logistic regression model was used to  
36  
37 identify factors that were independently predictive of inconsistent condom use during anal  
38  
39 intercourse, with adjusted odds ratio calculated at a significance level less than 0.05. Statistical  
40  
41 calculations were conducted using aggregated data of clients of FSWs from all three states, since  
42  
43 the eligibility criteria for respondents and the methods of sampling and behavioural data  
44  
45 collection were standardized and same in all the three states. Analysis was done by applying  
46  
47 appropriate weights. At the district level, weighting was based on the cluster effect of the sample.  
48  
49 At the aggregate level, standardized weights were calculated by combining the 12 districts.  
50  
51 STATA/SE version 11® (Stata Corporation, College Station, TX) was used for all the analyses.  
52  
53  
54  
55  
56  
57  
58  
59  
60

## Results

Of the 4,803 clients of FSWs (Andhra Pradesh (n=2016), Tamil Nadu (n=1217), and Maharashtra (n=1570), 12.3% reported having had anal intercourse in the past six months; 48.4% among them used condoms inconsistently during anal intercourse. In Andhra Pradesh, Maharashtra and Tamil Nadu those reporting anal sex were 18.9%, 6.5% and 17.7% respectively. Condom use during anal and vaginal sex varied widely in the different states (**Figure 2**) and since only a small proportion of clients in each of these states reported anal sex, the findings are based on an aggregate analysis.

As presented in Table 1, the bivariate analysis shows that the majority of inconsistent condom users were ages 26 years or older (84.3%), married (79.8 %) and solicited FSWs from public places (77.1 %). Literacy levels were lower among inconsistent condom users than among consistent condom users (50.0 % vs. 85.2 %, p=0.003). Similarly, a lower proportion of inconsistent condom users reported having had anal intercourse with a man than consistent condom users (18.7 % vs. 39.4 %, p=0.022). A higher proportion of inconsistent condom users consumed alcohol frequently (56.0 % vs. 37.5%, p=0.031) and considered themselves at risk of exposure to HIV than consistent condom users (47.9 % vs. 7.13 %, p=0.000). More than 30 % inconsistent condom users tested positive for HIV/STI, compared to a smaller proportion of consistent condom users (32.3 % vs. 9.7 %, p=0.085), but the association is not significant.

Table 2 shows the independent factors associated with inconsistent condom use during anal intercourse with FSWs. Clients of FSWs who were ages 26 years or older (AOR: 2.68, p=0.032), employed as manual laborers (AOR: 2.43, p=0.013), consumed alcohol (AOR: 2.63, p=0.001),

1  
2  
3 reported five or more sex acts with FSWs in the past month (AOR: 2.53, p=0.031), and perceived  
4 themselves to be at higher risk for HIV (AOR: 4.82, p=0.001) were more likely to inconsistently  
5 use condoms during anal intercourse than their counterparts. On the other hand, clients who were  
6 currently married (AOR: 0.41, p=0.056) and had sex with more number of FSWs ( $\geq 4$  and above)  
7 in the past month were less likely to inconsistently use condoms during anal intercourse than  
8 those never married/separated/divorced/widowed and who had sex with less than three FSWs.  
9 Testing positive for HIV or STI was not found to be associated with inconsistency in condom use  
10 during anal intercourse. Similarly, factors such as literacy level, place where the client solicited  
11 FSWs and whether he had had anal sex with a male/hijra partner were not associated with  
12 inconsistency in condom use during anal intercourse.  
13  
14  
15  
16  
17  
18  
19  
20  
21  
22  
23  
24  
25  
26  
27  
28  
29  
30

### 31 Discussion

32  
33  
34 IBBA, one of the few surveys in India to study large samples of clients of FSWs, has  
35 documented the practice of unprotected anal intercourse in three high HIV prevalence states of  
36 the country. Its findings show that anal intercourse is a substantial part of the commercial sex  
37 activity in India, with about 12 percent clients reporting experience of anal intercourse and  
38 nearly half of them not using condoms during anal intercourse with FSWs. The profile of clients  
39 who reported having unprotected anal intercourse with FSW varied from clients who did not  
40 report unprotected sex. Clients who were 26 years or older, frequently used alcohol, worked as  
41 manual laborers and reported higher number of sex acts with FSWs were at an increased risk of  
42 unprotected anal intercourse.  
43  
44  
45  
46  
47  
48  
49  
50  
51  
52  
53  
54  
55  
56  
57  
58  
59  
60

1  
2  
3 In the absence of comparable estimates on anal intercourse from client surveys in India, we  
4 examined the estimates available from studies on FSWs<sup>13 14 18 28</sup> and the reported prevalence  
5 ranged from 11.9% to 22.0% . It was apparent from these studies that there is a high demand for  
6 anal sex (above 40.0%). When compared with the prevalence reported in these FSW studies,  
7 the prevalence estimated in the current analysis seems to be much lower. Anal sex is certainly  
8 stigmatized among FSWs and they have a reason to under report this behavior., however, we  
9 don't know if it is similar for men.  
10  
11  
12  
13  
14  
15  
16  
17  
18  
19

20 The finding that older clients are at a higher risk of inconsistent condom use has been reported  
21 previously. Inconsistent condom use during vaginal intercourse with FSWs was found to be  
22 significantly associated with older clients.<sup>2</sup> The average age of marriage for Indian men is  
23 documented to be 26 years, and a majority of men (clients of FSWs) in this sample were married.  
24 A possible explanation for this risky behavior among older men could be the need to fulfill  
25 sexual desires or experimentation, followed by the belief that paying for sex would be less  
26 troublesome and more entertaining than sexual involvement with a non-sex worker.<sup>29</sup> It could  
27 also be plausible that inability of the older men to maintain erections may have resulted in  
28 inconsistent use of condoms during anal sex when compared to younger men. Older men who  
29 have sex with men have also been found to practice risky sexual behavior like inconsistent  
30 condom use.<sup>30</sup>  
31  
32  
33  
34  
35  
36  
37  
38  
39  
40  
41  
42  
43  
44  
45  
46

47 Likewise, clients who were manual laborers were more likely to be inconsistent condom users,  
48 compared to those in other occupations (white collar workers). The manual laborers in the  
49 current study include agricultural and non-agricultural laborers and cultivators. It is possible that  
50 many of these men migrated for work and stay away from their families. Additional analysis was  
51 undertaken to understand this dimension better; more than 50 % respondents reported travelling  
52  
53  
54  
55  
56  
57  
58  
59  
60

1  
2  
3 in the past one year, primarily for work. These men also reported buying sex from FSWs. Given  
4  
5 this scenario, it is imperative that tailored interventions be designed for those involved in manual  
6  
7 labor, who are often difficult to engage in prevention programs. These men could be captured  
8  
9 through networks of labor contractors and migrant populations. Educational campaigns and  
10  
11 counseling are also important to promote condom use for all partners and all types of sex.  
12  
13

14  
15 Our study also found that clients with higher self-perceived risk for HIV were more likely to be  
16  
17 inconsistent condom users. Such an association could be attributed to the fact that knowledge  
18  
19 and perceptions about safe or risky sex may not be sufficient to change an individual's behavior  
20  
21 until self-efficacy and determination in executing a behavior or action are present.<sup>31</sup> Studies that  
22  
23 have used the self-efficacy model among heterosexually active students have documented that  
24  
25 risk perceptions have no influence over condom use, as was noted in this study.<sup>8 32</sup> Another  
26  
27 plausible reason could be the lack of targeted interventions for clients, which, if present, could  
28  
29 have inculcated a sense of responsibility toward their sexual partners.  
30  
31  
32  
33

34  
35 Men who consume alcohol have been found more likely to engage in unprotected sex and anal  
36  
37 sex and have more than 10 FSW partners.<sup>33</sup> A similar association was observed in our study,  
38  
39 where clients who consumed alcohol frequently and reported five or more sexual encounters  
40  
41 were found to inconsistently use condoms during anal intercourse. It seems that the survey has  
42  
43 been able to capture high-risk clients, who have higher volume of sex acts with FSWs, engage in  
44  
45 anal intercourse and do not use condoms. Alcohol use and its association with HIV-related  
46  
47 sexual risk is well documented.<sup>33-35</sup> HIV prevention interventions must address this important  
48  
49 issue linked with compromise in safe sex practices/behavior. There is a clear need for HIV  
50  
51 prevention interventions tailored to provide information on alcohol related sexual risk.  
52  
53  
54  
55  
56  
57  
58  
59  
60

1  
2  
3 Although studies from the early 1990s have highlighted anal intercourse as a risk factor for  
4 HIV,<sup>9 36</sup> most AIDS prevention messages targeting heterosexuals continue to focus only on  
5 vaginal and oral sex transmission. Cultural taboos have possibly played a major role against  
6 acknowledging anal sexual practice. Research on vulnerable populations, including FSWs and  
7 youth, indicate that the persons particularly at risk of being infected by or transmitting HIV are  
8 more likely to practice anal intercourse.<sup>37</sup> Furthermore, people with experience in anal  
9 intercourse have been found to take more sexual risk when engaging in vaginal intercourse than  
10 those without anal experience.<sup>8</sup> Another important aspect is the condom negotiating ability of sex  
11 workers with clients. Factors in the physical, economic and policy environment influence  
12 condom use. In addition, the gendered power dynamics and the lack of choice sex workers have  
13 with heterosexual anal intercourse exacerbates their vulnerability. Sex workers need to be  
14 empowered to negotiate condom use with clients and motivate unwilling clients to use condoms  
15 during anal/vaginal sex.<sup>38</sup>

### 38 **Limitations of the study**

39  
40 Our study has its limitations. For one, both anal intercourse and condom use are self-reported  
41 measures and may, therefore, be influenced by the social desirability bias. As indicated by  
42 previous research, the social desirability bias gives rise to the possibility of underreporting.  
43 Given the difficulty in evaluating the magnitude of underreporting, we must be cautious in  
44 concluding that anal intercourse is practiced at relatively low rates among this population.  
45 Further, we did not have information on anal intercourse with regular female partners to establish  
46 concurrency or multidirectional risk during anal intercourse. Also, the survey did not gather  
47  
48  
49  
50  
51  
52  
53  
54  
55  
56  
57  
58  
59  
60

1  
2  
3 information on violence/coercion during anal sex. Future studies need to address these gaps. In  
4  
5 addition, qualitative studies are needed to better understand the context in which anal intercourse  
6  
7 occurs. In spite of these limitations, this is one of the first studies to document for the clients of  
8  
9 FSWs the practice of anal intercourse and the correlates of condom use during anal intercourse.  
10  
11

## 12 13 **Conclusions**

14  
15  
16  
17 The study indicates that HIV prevention programs targeting FSWs and their clients must  
18  
19 highlight the increased risk unprotected anal intercourse poses for both self and partners.  
20  
21 Condoms and water-based lubricants need to be marketed to reduce these risks. Interventions  
22  
23 also need to address factors that influence condom negotiation ability of sex workers. Given the  
24  
25 multidirectional risk, condom promotion programs must be extended to include specific  
26  
27 information on the benefits of consistent condom use while engaging in anal and other types of  
28  
29 sex. Safer sex messages addressing heterosexual anal intercourse need to be incorporated into  
30  
31 HIV prevention interventions for both FSWs and their clients. Current prevention programs fail  
32  
33 to address this issue. Greater emphasis in AIDS/STI prevention must be given to this typically  
34  
35 stigmatized and underreported sexual practice.  
36  
37  
38  
39  
40

## 41 **Competing interests**

42  
43 None declared  
44  
45  
46  
47

## 48 **Acknowledgement**

49  
50  
51 The authors wish to thank the Avahan state implementation partners for their partnership in this  
52  
53 study. We thank Dr. Stephen Schensul, Dr. Niranjana Saggurti and Dr. Bidhu Bhushan Mahapatra  
54  
55 for providing critical inputs during concept development and analysis. We also extend our  
56  
57  
58  
59  
60



1  
2  
3 gratitude to Dr. Steve Mills from FHI 360, Asia Pacific Regional Office, Bangkok, Thailand, for  
4 his inputs in the finalization of this manuscript. Finally, we thank the respondents for their  
5 participation in the study.  
6  
7  
8

9  
10 An earlier version (abstract) of this research paper was presented at the STI & AIDS World  
11 Congress 2013 in Vienna, Austria.  
12  
13

### 14 15 16 17 **Funding**

18 The Bill & Melinda Gates Foundation funded this research through Avahan: the India AIDS  
19 Initiative. The views expressed herein are those of the authors and do not necessarily reflect the  
20 official policy or position of the foundation and Avahan.  
21  
22  
23  
24  
25  
26  
27  
28  
29  
30

### 31 **Ethics approval**

32 Clearance for the study was taken from ethics committees of the participating institutes of Indian  
33 Council of Medical Research (National AIDS Research Institute, Pune; National Institute of  
34 Nutrition, Hyderabad; and National Institute of Epidemiology, Chennai) and FHI 360 (Protection  
35 of Human Subjects Committee).  
36  
37  
38  
39  
40  
41  
42  
43  
44  
45

### 46 **Data sharing statement**

47 IBBA Round 1 (2005-07) and Round 2 (2009-2010) data are available on request from the  
48 National AIDS Research Institute (NARI). The request form can be accessed from:  
49  
50

51 [http://www.nari-icmr.res.in/pdf/IBBA/Agreement-for-accessing-raw-IBBA%20\\_R1-&-](http://www.nari-icmr.res.in/pdf/IBBA/Agreement-for-accessing-raw-IBBA%20_R1-&-R2_data.pdf)  
52 [R2\\_data.pdf](http://www.nari-icmr.res.in/pdf/IBBA/Agreement-for-accessing-raw-IBBA%20_R1-&-R2_data.pdf)  
53  
54

55 Other IBBA-related documents are available at:  
56  
57  
58  
59  
60

1  
2  
3 [www.ibbainfo.in](http://www.ibbainfo.in)  
4  
5  
6  
7  
8  
9  
10

## 11 **Contributors**

12  
13  
14 SR and KN contributed to concept development, data analysis and interpretation, and writing and  
15 finalization of the manuscript. LR, PG, DY, SS, BG, HR, TS, and RSP contributed to concept  
16 design, review and finalization of the manuscript.  
17  
18  
19  
20  
21  
22  
23

## 24 **Figure legends**

25  
26  
27 Figure 1 – Conceptual framework of factor related with inconsistent condom use during anal  
28 intercourse.  
29  
30

31  
32 Figure 2 – Proportions of reported anal-vaginal sex and consistent condom use among male clients of  
33 regular and occasional FSWs, in Andhra Pradesh (AP), Maharashtra (MH) and Tamil Nadu (TN)  
34  
35  
36  
37  
38  
39  
40  
41  
42  
43  
44  
45  
46  
47  
48  
49  
50  
51  
52  
53  
54  
55  
56  
57  
58  
59  
60

## References:

1. National AIDS Control Organisation MoHaFW, Government of India. 2006. New Delhi, National Behavioural Surveillance Survey (BSS)-Female Sex Workers (FSWs) and their Clients.
2. Subramanian T, Gupte MD, Paranjape RS, et al. HIV, sexually transmitted infections and sexual behaviour of male clients of female sex workers in Andhra Pradesh, Tamil Nadu and Maharashtra, India: results of a cross-sectional survey. *AIDS* 2008 **22** ( 5):S69-79. .
3. McBride KR, Fortenberry JD. Heterosexual anal sexuality and anal sex behaviors: a review. *Journal of sex research* 2010;**47**(2):123-36.
4. Voeller B. AIDS and heterosexual anal intercourse. (0004-0002 (Print)).
5. Suryawanshi D, Bhatnagar T, Deshpande S, et al. Diversity among Clients of Female Sex Workers in India: Comparing Risk Profiles and Intervention Impact by Site of Solicitation. Implications for the Vulnerability of Less Visible Female Sex Workers. *PloS one* 2013;**8**(9):e73470.
6. National AIDS Control Organisation MoHaFW, Government of India. HIV Sentinel Surveillance 2010-11: A Technical Brief. New Delhi, 2012.
7. Samet JH, Pace CA, Cheng DM, et al. Alcohol use and sex risk behaviors among HIV-infected female sex workers (FSWs) and HIV-infected male clients of FSWs in India. *AIDS Behav* 2010;**14** (1):S74-83.
8. Baldwin JI, Baldwin JD. Heterosexual anal intercourse: an understudied, high-risk sexual behavior. *Archives of sexual behavior* 2000;**29**(4):357-73.
9. Halperin DT. Heterosexual anal intercourse: prevalence, cultural factors, and HIV infection and other health risks, Part I. *AIDS patient care and STDs* 1999;**13**(12):717-30.
10. Bradley J, Rajaram S, Moses S, et al. Female sex worker client behaviors lead to condom breakage: a prospective telephone-based survey in Bangalore, South India. *AIDS and behavior* 2013;**17**(2):559-67.
11. Priddy FH, Wakasiaka S, Hoang TD, et al. Anal sex, vaginal practices, and HIV incidence in female sex workers in urban Kenya: implications for the development of intravaginal HIV prevention methods. *AIDS research and human retroviruses* 2011;**27**(10):1067-72.
12. Bradley J, Rajaram S, Alary M, et al. Determinants of condom breakage among female sex workers in Karnataka, India. *BMC public health* 2011;**11 Suppl 6**:S14.
13. Beattie TS, Bradley JE, Vanta UD, et al. Vulnerability re-assessed: the changing face of sex work in Guntur district, Andhra Pradesh. *AIDS care* 2013;**25**(3):378-84.
14. Tucker S, Krishna R, Prabhakar P, et al. Exploring dynamics of anal sex among female sex workers in Andhra Pradesh. *Indian journal of sexually transmitted diseases* 2012;**33**(1):9-15.
15. Schwandt M Fau - Morris C, Morris C Fau - Ferguson A, Ferguson A Fau - Ngugi E, et al. Anal and dry sex in commercial sex work, and relation to risk for sexually transmitted infections and HIV in Meru, Kenya. *Sex Transm Infect* 2006 (1368-4973 (Print)).
16. Heywood W, Smith AM. Anal sex practices in heterosexual and male homosexual populations: a review of population-based data. *Sexual health* 2012;**9**(6):517-26.
17. Veldhuijzen NJ IC, Luchters S, Bosire W, Braunstein S, Chersich M, van de Wijgert J. Anal intercourse among female sex workers in East Africa is associated with other high-risk behaviours for HIV. *Sex Health* 2011 **8**(2):251-4.
18. Patra RK, Mahapatra B, Kovvali D, et al. Anal sex and associated HIV-related sexual risk factors among female sex workers in Andhra Pradesh, India. *Sexual health* 2012;**9**(5):430-7.
19. M. A. A Blind Spot in HIV prevention-Female Anal Sex.
20. Allen B, Cruz-Valdez A, Rivera-Rivera L, et al. [Affection, kisses, and condoms: the ABC of sexual practices of female sex workers in Mexico City]. *Salud publica de Mexico* 2003;**45 Supp 5**:S594-607.

- 1
  - 2
  - 3
  - 4
  - 5
  - 6
  - 7
  - 8
  - 9
  - 10
  - 11
  - 12
  - 13
  - 14
  - 15
  - 16
  - 17
  - 18
  - 19
  - 20
  - 21
  - 22
  - 23
  - 24
  - 25
  - 26
  - 27
  - 28
  - 29
  - 30
  - 31
  - 32
  - 33
  - 34
  - 35
  - 36
  - 37
  - 38
  - 39
  - 40
  - 41
  - 42
  - 43
  - 44
  - 45
  - 46
  - 47
  - 48
  - 49
  - 50
  - 51
  - 52
  - 53
  - 54
  - 55
  - 56
  - 57
  - 58
  - 59
  - 60
21. Decker Mr Fau - McCauley HL, McCauley HI Fau - Phuengsamran D, Phuengsamran D Fau - Janyam S, et al. Violence victimisation, sexual risk and sexually transmitted infection symptoms among female sex workers in Thailand. (1472-3263 (Electronic)).
22. Saidel T, Adhikary R, Mainkar M, et al. Baseline integrated behavioural and biological assessment among most at-risk populations in six high-prevalence states of India: design and implementation challenges. *AIDS (London, England)* 2008;**22**:S17-S34 10.1097/01.aids.0000343761.77702.04.
23. Myers T, Rowe CJ, Tudiver FG, et al. HIV, substance use and related behaviour of gay and bisexual men: an examination of the talking sex project cohort. *British journal of addiction* 1992;**87**(2):207-14.
24. Mimiaga MJ, Thomas B, Mayer KH, et al. Alcohol use and HIV sexual risk among MSM in Chennai, India. *International journal of STD & AIDS* 2011;**22**(3):121-5.
25. Greene E, Frye V, Mansergh G, et al. Correlates of unprotected vaginal or anal intercourse with women among substance-using men who have sex with men. *AIDS and behavior* 2013;**17**(3):889-99.
26. Mahapatra B, Lowndes CM, Mohanty SK, et al. Factors associated with risky sexual practices among female sex workers in Karnataka, India. *PloS one* 2013;**8**(4):e62167.
27. Grov C, Wolff M, Smith MD, et al. Male Clients of Male Escorts: Satisfaction, Sexual Behavior, and Demographic Characteristics. *Journal of sex research* 2013.
28. Alexander M, Mainkar M, Deshpande S, et al. Heterosexual anal sex among female sex workers in high HIV prevalence states of India: need for comprehensive intervention. *PloS one* 2014;**9**(2):e88858.
29. Pitts MK, Smith Am Fau - Grierson J, Grierson J Fau - O'Brien M, et al. Who pays for sex and why? An analysis of social and motivational factors associated with male clients of sex workers. (0004-0002 (Print)).
30. Ramanathan S, Chakrapani V, Ramakrishnan L, et al. Consistent condom use with regular, paying, and casual male partners and associated factors among men who have sex with men in Tamil Nadu, India: findings from an assessment of a large-scale HIV prevention program. *BMC public health* 2013;**13**(1):827.
31. Bandura A. Perceived self-efficacy in the exercise of control over AIDS infection. *Evaluation and Program Planning* 1990;**13**(1):9-17.
32. Wulfert E WC. Condom use: a self-efficacy model. *Health Psychol* 1993 **12**(5):346-53.
33. Madhivanan P HA, Gogate A, Stein E, Gregorich S, Setia M, Kumta S, Ekstrand M, Mathur M, Jerajani H, Lindan CP. Alcohol use by men is a risk factor for the acquisition of sexually transmitted infections and human immunodeficiency virus from female sex workers in Mumbai, India. *Sexually transmitted diseases* 2005;**32**(11):685-90.
34. Schensul J, Singh SK, Gupta K, et al. Alcohol and HIV in India: A Review of Current Research and Intervention. *AIDS and behavior* 2010;**14**(1):1-7.
35. Mimiaga MJ, Thomas B, Mayer KH, et al. Alcohol use and HIV sexual risk among MSM in Chennai, India. *International journal of STD & AIDS* 2011;**22**(3):121-25.
36. Erickson PI, Bastani R, Maxwell AE, et al. Prevalence of anal sex among heterosexuals in California and its relationship to other AIDS risk behaviors. *AIDS education and prevention : official publication of the International Society for AIDS Education* 1995;**7**(6):477-93.
37. Stulhofer A, Bacak V. Is anal sex a marker for sexual risk-taking? Results from a population-based study of young Croatian adults. *Sexual health* 2011;**8**(3):384-9.
38. Bharat S, Mahapatra B, Roy S, et al. Are Female Sex Workers Able to Negotiate Condom Use with Male Clients? The Case of Mobile FSWs in Four High HIV Prevalence States of India. *PloS one* 2013;**8**(6):e68043.

**Table 1: Characteristics of clients of FSWs who reported anal intercourse (past six months) with occasional and regular FSWs and condom use**

| Characteristics                                                 | Consistent condom users<br>(n=397, 51.5%)<br>% (number) | Inconsistent condom users<br>(n=280, 48.4%)<br>% (number) | p-value |
|-----------------------------------------------------------------|---------------------------------------------------------|-----------------------------------------------------------|---------|
| Age                                                             |                                                         |                                                           |         |
| ≤25 years                                                       | 27.1 (117)                                              | 15.6 (53)                                                 | 0.165   |
| 26 years or older                                               | 72.8 (280)                                              | 84.3 (227)                                                |         |
| Education                                                       |                                                         |                                                           |         |
| Illiterate                                                      | 14.8 (64)                                               | 49.9 (57)                                                 | 0.003   |
| Literate                                                        | 85.2 (333)                                              | 50.0 (223)                                                |         |
| Marital status                                                  |                                                         |                                                           |         |
| Never married/widowed/separated/divorced                        | 29.8 (120)                                              | 20.11 (84)                                                | 0.266   |
| Currently married                                               | 70.1 (277)                                              | 79.8 (196)                                                |         |
| Occupation                                                      |                                                         |                                                           |         |
| Non-laborer (students/business/service)                         | 51.4 (214)                                              | 46.1 (90)                                                 | 0.749   |
| Manual laborer (agricultural/non-agricultural labor/cultivator) | 48.5 (181)                                              | 53.8 (190)                                                |         |
| Place solicited FSWs                                            |                                                         |                                                           |         |
| Non-public place (brothel/home/lodge/dhaba)                     | 30.6 (117)                                              | 22.9 (93)                                                 | 0.448   |
| Public place                                                    | 69.3 (278)                                              | 77.1 (186)                                                |         |
| No. of FSWs had sex with in the past one month                  |                                                         |                                                           |         |
| ≤3 FSWs                                                         | 72.3 (324)                                              | 86.4 (229)                                                | 0.088   |
| ≥4 FSWs and above                                               | 27.6 (73)                                               | 13.5 (51)                                                 |         |
| No. of sex acts with FSWs in the past one month                 |                                                         |                                                           |         |
| ≤4 times                                                        | 73.7 (285)                                              | 76.0 (184)                                                | 0.812   |
| ≥5 and above                                                    | 26.2 (111)                                              | 23.9 (95)                                                 |         |
| Perceive to be at high risk of exposure to HIV                  |                                                         |                                                           |         |
| No                                                              | 92.8 (337)                                              | 52.0 (188)                                                | 0.000   |
| Yes                                                             | 7.13 (39)                                               | 47.9 (82)                                                 |         |
| Alcohol user                                                    |                                                         |                                                           |         |
| Infrequent drinker                                              | 62.4 (262)                                              | 43.9 (142)                                                | 0.031   |
| Frequent drinker (everyday)                                     | 37.5 (116)                                              | 56.0 (121)                                                |         |
| Ever had anal intercourse with a man/hijra                      |                                                         |                                                           |         |
| No                                                              | 60.5 (311)                                              | 81.2 (179)                                                | 0.022   |
| Yes                                                             | 39.4 (86)                                               | 18.7 (101)                                                |         |
| Any HIV/STIs                                                    |                                                         |                                                           |         |
| Negative                                                        | 90.2 (367)                                              | 67.6 (253)                                                | 0.085   |
| Positive                                                        | 9.7 (30)                                                | 32.3 (27)                                                 |         |

**Table 2: Independent factors associated with inconsistent condom use during anal intercourse with FSWs in multivariate analysis**

| Characteristics                                                     | Crude odds ratio<br>(95% CI) | p-value | Adjusted odds ratio<br>(95% CI) | p-value |
|---------------------------------------------------------------------|------------------------------|---------|---------------------------------|---------|
| Age                                                                 |                              |         |                                 |         |
| ≤25 years                                                           | Referent                     |         | Referent                        |         |
| 26 years or older                                                   | 2.00 (0.74-5.40)             | 0.170   | 2.68 (1.09-6.61)                | 0.032   |
| Education                                                           |                              |         |                                 |         |
| Illiterate                                                          | Referent                     |         | Referent                        |         |
| Literate                                                            | 0.17 (0.05-0.59)             | 0.005   | 0.66 (0.28-1.56)                | 0.347   |
| Occupation                                                          |                              |         |                                 |         |
| Non-laborer<br>(student/business/service)                           | Referent                     |         | Referent                        |         |
| Manual laborer (agricultural/non-<br>agricultural labor/cultivator) | 1.23 (0.33-4.48)             | 0.749   | 2.43 (1.21-4.90)                | 0.013   |
| Marital status                                                      |                              |         |                                 |         |
| Never married/widowed/separated<br>/divorced                        | Referent                     |         | Referent                        |         |
| Currently married                                                   | 1.69 (0.66-4.31)             | 0.269   | 0.32 (0.13-0.80)                | 0.015   |
| Place solicited FSWs                                                |                              |         |                                 |         |
| Non-public place<br>(brothel/home/lodge/dhaba)                      | Referent                     |         | Referent                        |         |
| Public place                                                        | 1.49 (0.52-4.20)             | 0.449   | 1.26 (0.60-2.61)                | 0.533   |
| No. of FSWs had sex with in the past<br>one month                   |                              |         |                                 |         |
| ≤3 FSWs                                                             | Referent                     |         | Referent                        |         |
| ≥ 4 FSWs and above                                                  | 0.41 (0.14-1.16)             | 0.094   | 0.29 (0.10-0.84)                | 0.022   |
| No. of sex acts with FSWs in the past<br>one month                  |                              |         |                                 |         |
| ≤ 4 times                                                           | Referent                     |         | Referent                        |         |
| ≥ 5 and above                                                       | 0.88 (0.32-2.41)             | 0.812   | 2.53 (0.09-5.90)                | 0.031   |
| Perceive to be at high risk of<br>exposure to HIV                   |                              |         |                                 |         |
| No                                                                  | Referent                     |         | Referent                        |         |
| Yes                                                                 | 11.99 (3.08-46.5)            | 0.000   | 4.82 (1.91-12.14)               | 0.001   |
| Alcohol user                                                        |                              |         |                                 |         |
| Infrequent drinker                                                  | Referent                     |         | Referent                        |         |
| Frequent drinker (everyday)                                         | 2.11 (1.06-4.20)             | 0.033   | 2.63 (1.46-4.71)                | 0.001   |
| Ever had anal intercourse with a<br>man/hijra                       |                              |         |                                 |         |
| No                                                                  | Referent                     |         | Referent                        |         |
| Yes                                                                 | 0.35 (0.14-0.87)             | 0.025   | 0.76 (0.39-1.50)                | 0.440   |
| Any HIV/STIs                                                        |                              |         |                                 |         |
| Negative                                                            | Referent                     |         | Referent                        |         |
| Positive                                                            | 4.42 (0.74-26.32)            | 0.102   | 0.73 (0.25-2.12)                | 0.568   |

1  
2  
3  
4  
5  
6  
7  
8  
9  
10  
11  
12  
13  
14  
15  
16  
17  
18  
19  
20  
21  
22  
23  
24  
25  
26  
27  
28  
29  
30  
31  
32  
33  
34  
35  
36  
37  
38  
39  
40  
41  
42  
43  
44  
45  
46  
47  
48  
49  
50  
51  
52  
53  
54  
55  
56  
57  
58  
59  
60

For peer review only

1  
2  
3  
4  
5  
6  
7  
8  
9  
10  
11  
12  
13  
14  
15  
16  
17  
18  
19  
20  
21  
22  
23  
24  
25  
26  
27  
28  
29  
30  
31  
32  
33  
34  
35  
36  
37  
38  
39  
40  
41  
42  
43  
44  
45  
46  
47  
48  
49  
50  
51  
52  
53  
54  
55  
56  
57  
58  
59  
60

**Title: Inconsistent condom use by male clients during anal intercourse with occasional and regular female sex workers (FSWs): Survey findings from southern ~~three high-prevalence~~ states of India**

#### Corresponding author

Shreena Ramanathan  
Technical Manager, M&E, Knowledge Network, DAKSH  
FHI 360, India  
H-5 (Ground Floor), Green Park Extension,  
New Delhi - 110016,  
India  
E-mail: [sramanathan@fhi360.org](mailto:sramanathan@fhi360.org)  
Ph: 91-11-40487777  
Fax: 91-11-26172646

#### Co-Authors

Karikalan Nagarajan, National AIDS Research Institute (NARI) Pune, India  
Lakshmi Ramakrishnan, FHI 360, New Delhi, India  
Mandar K Mainkar, National AIDS Research Institute (NARI) Pune, India  
Prabuddhagopal Goswami, FHI 360, New Delhi, India  
Diwakar Yadav, formerly with FHI 360, New Delhi, India  
Shrabanti Sen, FHI 360, New Delhi, India  
Bitra George, FHI 360, New Delhi, India  
Harikumar Rachakulla, National Institute of Nutrition (NIN), Hyderabad, India  
Thilakavathi Subramanian, National Institute of Epidemiology (NIE), Chennai, India  
Ramesh S. Paranjape, National AIDS Research Institute (NARI) Pune, India

#### Emails:

KN: [drkarikalan82@gmail.com](mailto:drkarikalan82@gmail.com)  
LR: [ramaklak@gmail.com](mailto:ramaklak@gmail.com)  
MM: [mandar5670@gmail.com](mailto:mandar5670@gmail.com)  
PG: [pgoswami@fhi360.org](mailto:pgoswami@fhi360.org)  
DY: [yadavdiwakar7@gmail.com](mailto:yadavdiwakar7@gmail.com)  
SS: [SSen@fhi360.org](mailto:SSen@fhi360.org)  
BG: [BGeorge@fhi360.org](mailto:BGeorge@fhi360.org)  
HR: [drharikumar1959@yahoo.co.in](mailto:drharikumar1959@yahoo.co.in)  
TS: [thilakavathi\\_s@rediffmail.com](mailto:thilakavathi_s@rediffmail.com)  
RSP: [rparanjape@nariindia.org](mailto:rparanjape@nariindia.org)



1  
2  
3  
4  
5  
6  
7  
8  
9 **Keywords:** clients of female sex workers, FSW, anal intercourse, condom use, HIV, STI, India,  
10 Maharashtra, Tamil Nadu, Andhra Pradesh

11  
12  
13 **Word count: 3004** (Introduction, methods, results and conclusion)

#### 14 15 16 17 **Competing interests**

18 None declared

#### 19 20 21 22 **Acknowledgement**

23  
24  
25 The authors wish to thank the Avahan state implementation partners for their partnership in this  
26 study. We thank Dr. Stephen Schensul, Dr. Niranjana Saggurti and Dr. Bidhu Bhushan Mahapatra  
27 for providing critical inputs during concept development and analysis. We also extend our  
28 gratitude to Dr. Steve Mills from FHI 360, Asia Pacific Regional Office, Bangkok, Thailand, for  
29 his inputs in the finalization of this manuscript. Finally, we thank the respondents for their  
30 participation in the study.

31  
32  
33 An earlier version (abstract) of this research paper was presented at the STI & AIDS World  
34 Congress 2013 in Vienna, Austria.

#### 35 36 37 38 **Funding**

39  
40  
41 The Bill & Melinda Gates Foundation funded this research through Avahan: the India AIDS  
42 Initiative. The views expressed herein are those of the authors and do not necessarily reflect the  
43 official policy or position of the foundation and Avahan.

1  
2  
3  
4  
5  
6  
7  
8  
9  
10  
11  
12  
13  
14  
15  
16  
17  
18  
19  
20  
21  
22  
23  
24  
25  
26  
27  
28  
29  
30  
31  
32  
33  
34  
35  
36  
37  
38  
39  
40  
41  
42  
43  
44  
45  
46  
47  
48  
49  
50  
51  
52  
53  
54  
55  
56  
57  
58  
59  
60

### **Ethics approval**

Clearance for the study was taken from ethics committees of the participating institutes of Indian Council of Medical Research (National AIDS Research Institute, Pune; National Institute of Nutrition, Hyderabad; and National Institute of Epidemiology, Chennai) and FHI 360 (Protection of Human Subjects Committee).

### **Data sharing statement**

IBBA Round 1 (2005-07) and Round 2 (2009-2010) data are available on request from the National AIDS Research Institute (NARI). The request form can be accessed from:

[http://www.nari-icmr.res.in/pdf/IBBA/Agreement-for-accessing-raw-IBBA%20\\_R1-&-R2\\_data.pdf](http://www.nari-icmr.res.in/pdf/IBBA/Agreement-for-accessing-raw-IBBA%20_R1-&-R2_data.pdf)

Other IBBA-related documents are available at:

[www.ibbainfo.in](http://www.ibbainfo.in)

## **Abstract**

### **Objectives**

Recent studies from India have documented varying estimates of self-reported anal intercourse (ranging 3% to 80%) by female sex workers (FSWs). However, comparable data on anal intercourse and condom use from male clients of FSWs is lacking. Using data from a bio-behavioural survey (2009–2010), we examined prevalence of anal intercourse, male clients' self-reported inconsistent condom use during anal intercourse with FSWs, and correlates of this behavior in ~~three of~~ India's high-prevalence southern states (~~—~~ Andhra Pradesh, Maharashtra and Tamil Nadu combined).

---

### **Methods**

Using two-stage time location cluster sampling, we recruited 4,803 clients of FSWs, ages 18–60 years, who had purchased sex from an FSW in the past month. After obtaining informed consent, respondents were interviewed and tested for HIV and STIs (syphilis, gonorrhoea and chlamydia). Logistic regression analysis was used to identify the factors associated with inconsistent condom use during anal intercourse (in the past six months) with FSWs.

### **Results**

Overall, 12.4% clients reported anal intercourse in the past six months, of which 48.4% used condoms inconsistently. Clients of FSWs who were ages 26 years or older (AOR: 2.68,  $p=0.032$ ); employed as manual laborers (AOR: 2.43,  $p=0.013$ ); consumed alcohol (AOR: 2.63,  $p=0.001$ ), reported five or more sex acts with FSWs in the past month (AOR: 2.53,  $p=0.031$ ) and perceived

Formatted: Tab stops: 2.15", Left

1  
2  
3  
4  
5  
6  
7  
8  
9  
10  
11  
12  
13  
14  
15  
16  
17  
18  
19  
20  
21  
22  
23  
24  
25  
26  
27  
28  
29  
30  
31  
32  
33  
34  
35  
36  
37  
38  
39  
40  
41  
42  
43  
44  
45  
46  
47  
48  
49  
50  
51  
52  
53  
54  
55  
56  
57  
58  
59  
60

themselves to be at higher risk for HIV (AOR: 4.82,  $p=0.001$ ) were more likely to inconsistently use condoms during anal intercourse.

### **Conclusion**

The results suggest that sex workers and their clients commonly practice anal intercourse, but a relatively high proportion of clients do not consistently use condoms, leading to a greater risk of acquiring HIV and its further transmission to other male and female sexual partners. Given the multidirectional risk, safer sex communication on heterosexual anal intercourse must be incorporated into HIV prevention programs.

### **Article summary**

This paper discusses the prevalence of anal intercourse, male clients' self-reported inconsistent condom use during anal intercourse with FSWs, and correlates of this behavior in Andhra Pradesh, Maharashtra and Tamil Nadu.

### **Key messages**

- Sex workers and their clients commonly practice anal intercourse, but a relatively high proportion of clients do not consistently use condoms, resulting in a greater risk of acquiring HIV and its further transmission to other male and female sexual partners.
- Safer sex messages on heterosexual anal intercourse should be incorporated into HIV prevention interventions for both FSWs and their clients.

1  
2  
3  
4  
5  
6  
7  
8  
9  
10  
11  
12  
13  
14  
15  
16  
17  
18  
19  
20  
21  
22  
23  
24  
25  
26  
27  
28  
29  
30  
31  
32  
33  
34  
35  
36  
37  
38  
39  
40  
41  
42  
43  
44  
45  
46  
47  
48  
49  
50  
51  
52  
53  
54  
55  
56  
57  
58  
59  
60

### Strengths and limitations of this study

- Using data from a large scale multi-site bio-behavioral survey, this paper discusses the prevalence and practice of unprotected anal intercourse among clients of sex workers in ~~three~~ high HIV prevalent ~~ee~~ southern states of India.
- Both anal intercourse and condom use are self-reported measures and may therefore be influenced by the social desirability bias, resulting in under or over reporting of the phenomena.

1  
2  
3  
4  
5  
6  
7  
8  
9  
10  
11  
12  
13  
14  
15  
16  
17  
18  
19  
20  
21  
22  
23  
24  
25  
26  
27  
28  
29  
30  
31  
32  
33  
34  
35  
36  
37  
38  
39  
40  
41  
42  
43  
44  
45  
46  
47  
48  
49  
50  
51  
52  
53  
54  
55  
56  
57  
58  
59  
60

## Introduction

Heterosexual anal intercourse (HAI) is an understudied risk behavior among clients of female sex workers (CFSWs), a vulnerable population that has been identified as a critical bridge group in HIV transmission.<sup>1 2</sup> HAI has thus far received little attention, even though depictions of heterosexual anal intercourse can be found in art and artifacts dating to antiquity.<sup>3</sup> The silence on this front is perhaps linked to society's discomfort with HAI, coupled with the notion that anal intercourse is a homosexual male practice, not heterosexual.<sup>3 4</sup> Most HIV transmission in India occurs through heterosexual networks<sup>5 6</sup>, and unprotected, heterosexual transactional sex plays a central role in the spread of HIV.<sup>7</sup> Previous studies indicate that condom usage is higher for vaginal intercourse than for heterosexual anal sex.<sup>8 9</sup> Furthermore, studies have documented condom breakage when condoms were used during anal intercourse, thereby increasing chances of infection.<sup>10-12</sup> While behavioral interventions targeting FSWs have substantially reduced HIV prevalence in general, the FSWs' HIV and STI vulnerability remains high due to the increasing trend of risky behaviors, such as unprotected anal intercourse with clients.<sup>13 14</sup>

Given the high vulnerabilities associated with HAI in commercial and non-commercial sex settings, a few research studies have assessed anal intercourse prevalence and associated factors among FSWs and the general population.<sup>15-17</sup> Similar to findings from other countries in commercial sex settings, studies on FSWs in India have also documented increased trend for anal intercourse with clients.<sup>13 14 18</sup> Varying estimates of anal intercourse prevalence have been documented in India, ranging from 3 to 80.<sup>13 18 19</sup> In India and elsewhere, the primary reason for FSWs selling anal sex is the extra money it brings from clients. It is also linked to associated factors such as economic hardship, debt status and lack of alternate source of income.<sup>14 18</sup> Anal intercourse is usually demand driven, not preferred by FSWs and at times even forced by clients

1  
2  
3  
4  
5  
6  
7  
8  
9 through violence.<sup>15 18 20 21</sup> Both intervention and research in the area are extensive among FSWs.  
10 However, there is paucity of behavioral research on clients' self-reported anal intercourse and  
11 condom use during anal intercourse. This paper examines the correlates of clients' inconsistent  
12 condom use during anal intercourse with FSWs. The study has used cross-sectional survey data  
13 collected from clients of FSW in three high HIV prevalence states of India.  
14  
15  
16  
17

## 18 **Materials and Methods**

### 19 *Data source*

20  
21  
22  
23  
24 Data were derived from a cross-sectional bio-behavioural survey (called integrated behavioral  
25 and biological assessment [IBBA]) that was conducted among clients of FSWs as part of the  
26 evaluation of a large-scale HIV prevention program in 12 districts across the three Indian states  
27 of Andhra Pradesh, Maharashtra and Tamil Nadu during 2009–2010. Men, of ages 18–60 years,  
28 who reported purchasing sex from an FSW in the past month, were considered eligible  
29 respondents. These eligible respondents were identified with the help of FSWs, brokers, pimps,  
30 etc., at places of FSW solicitation/entertainment and recruited for the study. The survey used a  
31 two-stage cluster sampling design with time location clusters (TLCs) as primary sampling units.  
32 Clusters were randomly selected by using probability proportional to size (PPS) in the first stage.  
33 From these selected clusters, respondents were then selected through systematic random  
34 sampling in the second stage. Behavioral information was collected through a structured,  
35 interviewer-administered questionnaire, and blood and urine samples were collected to test for  
36 HIV and other STIs (gonorrhoea, chlamydia, syphilis). A detailed description of the survey  
37 methodology is available elsewhere.<sup>22</sup>  
38  
39  
40  
41  
42  
43  
44  
45  
46  
47  
48  
49  
50  
51  
52  
53  
54  
55  
56  
57  
58  
59  
60

1  
2  
3  
4  
5  
6  
7  
8  
9 Prior oral or written informed consent was obtained from all respondents. The survey was  
10 approved by the ethics committees of the participating institutes of Indian Council of Medical  
11 Research (National AIDS Research Institute, Pune; National Institute of Nutrition, Hyderabad;  
12 and National Institute of Epidemiology, Chennai) and FHI 360 (Protection of Human Subjects  
13 Committee).  
14  
15  
16  
17  
18  
19

### 20 *Conceptual framework*

21  
22 For the current analysis, a conceptual framework (Figure 1, illustrated below) was used as a  
23 device to explain and identify the different factors that may be associated with inconsistent  
24 condom use during anal intercourse with FSWs.  
25  
26  
27  
28

29 Inconsistent condom use during anal intercourse was the dependent variable. The independent  
30 variables were selected based on their contextual relation with the dependent variable. Based on  
31 prior research, individual factors such as risk perception, alcohol use,<sup>23-25</sup> frequency of  
32 commercial sex, volume of sex acts,<sup>14 26</sup> having male/transgender partners,<sup>27</sup> place of soliciting  
33 FSWs<sup>5</sup> and having HIV/STIs,<sup>18</sup> which are widely seen to influence condom use among different  
34 high-risk population groups, were included. We hypothesized that clients who were married,  
35 consumed alcohol, solicited FSWs from public places and had a higher number of FSW partners  
36 were more likely to be inconsistent condom users. These clients were also more likely to have  
37 experienced anal sex with a man. Most current interventions for clients of FSWs are limited to  
38 condom promotion and distribution, and no intervention for FSWs or their clients currently  
39 addresses heterosexual anal intercourse, which has significant implications for HIV prevention  
40 programming.  
41  
42  
43  
44  
45  
46  
47  
48  
49  
50  
51  
52  
53  
54  
55  
56  
57  
58  
59  
60



1  
2  
3  
4  
5  
6  
7  
8  
9 Based on the rationale described above, we grouped the different indicators into two categories:

10 a) socio-demographic and b) HIV-related sexual risk behaviors.

### 11 *Measures*

#### 12 *Dependent variable:*

13  
14  
15  
16 Inconsistent condom use during anal intercourse - This behavior was assessed by asking: “How  
17 often did you use a condom while having anal intercourse with your regular and occasional  
18 FSWs in the past six months?” The clients who reported using condoms most of the time,  
19 sometimes or never were considered inconsistent condom users (coded as ‘1’), while those who  
20 reported using condoms every time during anal intercourse were considered consistent condom  
21 users (coded as ‘0’).  
22  
23  
24  
25  
26  
27  
28  
29  
30  
31  
32

#### 33 *Independent variables:*

34  
35 The independent variables included age in completed years; education (illiterate, can read only,  
36 can read and write); occupation (pre-coded as unemployed, student, domestic servant,  
37 agricultural labor, non-agricultural/casual labor, skilled/semi-skilled labor, petty  
38 businessman/shop owner, large businessman/shop owner, bus/truck drivers/helpers, other  
39 transport workers, service and others); marital status (currently married, separated, divorced,  
40 widowed, never married, no answer); place of soliciting FSWs (pre-coded as bar/night club,  
41 public place, street, park, railway station, agent, brothel, hotel/lodge, home, *dhaba*, by telephone,  
42 other); number of FSWs had sex with in the past month; number of sex acts with FSWs in the  
43 past month; ever had anal intercourse with a man/transgender (yes/no); self-risk perception  
44  
45  
46  
47  
48  
49  
50  
51  
52

1  
2  
3  
4  
5  
6  
7  
8  
9 (yes/no); alcohol consumption (everyday, at least once a week, less than once a week, never, no  
10 answer); and having HIV or any STI (those having HIV, syphilis, gonorrhoea or chlamydia were  
11 grouped into positive and the rest as negative).  
12  
13

14  
15 Given the skewed distribution, all the variables were dichotomized for the analysis. Age was  
16 categorized into  $\leq 25$  years and 26 years or older; education was grouped into literate and  
17 illiterate; occupation into laborers (manual) and non-laborers, marital status as currently married  
18 and never married/widowed/separated/divorced; place of soliciting FSWs into public place and  
19 non-public place; number of FSWs had sex with as  $\leq 3$  FSWs and  $\geq 4$  FSWs; number of sex acts  
20 as  $\leq 4$  times and  $\geq 5$  times; and alcohol use into frequent and infrequent drinkers.  
21  
22  
23  
24  
25  
26

### 27 *Statistical analysis*

28  
29  
30 Descriptive statistics were calculated and used to measure the levels of inconsistent condom use  
31 (during anal intercourse) and other selected variables. Chi-square tests were used to assess the  
32 significance of bivariate relationships between demographic characteristics of clients and their  
33 condom use behaviour during anal intercourse. Multiple logistic regression model was used to  
34 identify factors that were independently predictive of inconsistent condom use during anal  
35 intercourse, with adjusted odds ratio calculated at a significance level less than 0.05. Statistical  
36 calculations were conducted using aggregated data of clients of FSWs from all three states, since  
37 the eligibility criteria for respondents and the methods of sampling and behavioural data  
38 collection were standardized and same in all the three states. Analysis was done by applying  
39 appropriate weights. At the district level, weighting was based on the cluster effect of the sample.  
40  
41 At the aggregate level, standardized weights were calculated by combining the 12 districts.  
42  
43 STATA/SE version 11® (Stata Corporation, College Station, TX) was used for all the analyses.  
44  
45  
46  
47  
48  
49  
50  
51  
52

## Results

Of the 4,803 clients of FSWs (Andhra Pradesh (n=2016), Tamil Nadu (n=1217), and Maharashtra (n=1570), 12.34% reported having had anal intercourse in the past six months; 48.4% among them used condoms inconsistently during anal intercourse. In Andhra Pradesh, Maharashtra and Tamil Nadu those reporting anal sex were 19.18.9%, 6.56% and 17.7% respectively (Data not shown in table). Condom use during anal and vaginal sex varied widely in the different states (Figure 2) and since only a small proportion of clients in each of these states reported anal sex, the findings are based on an aggregate analysis. 75.5% clients in Andhra Pradesh, 16.2% in Maharashtra and 8.2% in Tamil Nadu reported using condoms consistently during anal sex with FSW. In contrast, the reported condom use during vaginal sex was nearly 50% in Tamil Nadu, 40% in Andhra Pradesh and 10.5% in Maharashtra (Data not shown in table).

As presented in Table 1, the bivariate analysis shows that the majority of inconsistent condom users were ages 26 years or older (84.3%), married (79.8 %) and solicited FSWs from public places (77.1 %). Literacy levels were lower among inconsistent condom users than among consistent condom users (50.0 % vs. 85.2 %, p=0.003). Similarly, a lower proportion of inconsistent condom users reported having had anal intercourse with a man than consistent condom users (18.7 % vs. 39.4 %, p=0.022). A higher proportion of inconsistent condom users consumed alcohol frequently (56.0 % vs. 37.5%, p=0.031) and considered themselves at risk of exposure to HIV than consistent condom users (47.9 % vs. 7.13 %, p=0.000). More than 30 %

1  
2  
3  
4  
5  
6  
7  
8  
9 inconsistent condom users tested positive for HIV/STI, compared to a smaller proportion of  
10 consistent condom users (32.3 % vs. 9.7 %,  $p=0.085$ ), but the association is not significant.

11  
12  
13 Table 2 shows the independent factors associated with inconsistent condom use during anal  
14 intercourse with FSWs. Clients of FSWs who were ages 26 years or older (AOR: 2.68,  $p=0.032$ ),  
15 employed as manual laborers (AOR: 2.43,  $p=0.013$ ), consumed alcohol (AOR: 2.63,  $p=0.001$ ),  
16 reported five or more sex acts with FSWs in the past month (AOR: 2.53,  $p=0.031$ ), and perceived  
17 themselves to be at higher risk for HIV (AOR: 4.82,  $p=0.001$ ) were more likely to inconsistently  
18 use condoms during anal intercourse than their counterparts. On the other hand, clients who were  
19 currently married (AOR: 0.41,  $p=0.056$ ) and had sex with more number of FSWs ( $\geq 4$  and above)  
20 in the past month were less likely to inconsistently use condoms during anal intercourse than  
21 those never married/separated/divorced/widowed and who had sex with less than three FSWs.  
22 Testing positive for HIV or STI was not found to be associated with inconsistency in condom use  
23 during anal intercourse. Similarly, factors such as literacy level, place where the client solicited  
24 FSWs and whether he had had anal sex with a male/hijra partner were not associated with  
25 inconsistency in condom use during anal intercourse.  
26  
27  
28  
29  
30  
31  
32  
33  
34  
35  
36  
37  
38  
39  
40

#### 41 **Discussion**

42  
43 IBBA, one of the few surveys in India to study large samples of clients of FSWs, has  
44 documented the practice of unprotected anal intercourse in three high HIV prevalence states of  
45 the country. Its findings show that anal intercourse is a substantial part of the commercial sex  
46 activity in India, with about 12 percent clients reporting experience of anal intercourse and  
47 nearly half of them not using condoms during anal intercourse with FSWs. The profile of clients  
48  
49  
50  
51  
52

1  
2  
3  
4  
5  
6  
7  
8  
9 who reported having unprotected anal intercourse with FSW varied from clients who did not  
10 report unprotected sex. Clients who were 26 years or older, frequently used alcohol, worked as  
11 manual laborers and reported higher number of sex acts with FSWs were at an increased risk of  
12 unprotected anal intercourse.  
13  
14  
15

16  
17 In the absence of comparable estimates on anal intercourse from client surveys in India, we  
18 examined the estimates available from studies on FSWs<sup>13 14 18 28</sup> ~~and the reported prevalence~~  
19 ~~ranged from 11.9% to 22.0%~~. It was apparent ~~from these studies~~ that there is a high demand for  
20 anal sex ~~(above 40.0%)~~. When compared with the prevalence reported ~~by in these previous~~  
21 FSW studies, the prevalence estimated in the current analysis seems to be much lower. Anal sex  
22 is certainly stigmatized among FSWs and they have a reason to under report ~~this~~  
23 ~~behavioreondom-use~~. ~~H~~however, we don't know if it is similar for men ~~and this was not~~  
24 ~~measured and is a major limitation~~.  
25  
26  
27  
28  
29  
30  
31  
32

33 The finding that older clients are at a higher risk of inconsistent condom use has been reported  
34 previously. Inconsistent condom use during vaginal intercourse with FSWs was found to be  
35 significantly associated with older clients.<sup>2</sup> The average age of marriage for Indian men is  
36 documented to be 26 years, and a majority of men (clients of FSWs) in this sample were married.  
37 A possible explanation for this risky behavior among older men could be the need to fulfill  
38 sexual desires or experimentation, followed by the belief that paying for sex would be less  
39 troublesome and more entertaining than sexual involvement with a non-sex worker.<sup>29</sup> It could  
40 also be plausible that inability of the older men to maintain erections may have resulted in  
41 inconsistent use of condoms during anal sex when compared to younger men. Older men who  
42 have sex with men have also been found to practice risky sexual behavior like inconsistent  
43 condom use.<sup>30</sup>  
44  
45  
46  
47  
48  
49  
50  
51  
52

1  
2  
3  
4  
5  
6  
7  
8  
9 Likewise, clients who were manual laborers were more likely to be inconsistent condom users,  
10 compared to those in other occupations (white collar workers). The manual laborers in the  
11 current study include agricultural and non-agricultural laborers and cultivators. It is possible that  
12 many of these men migrated for work and stay away from their families. Additional analysis was  
13 undertaken to understand this dimension better; more than 50 % respondents reported travelling  
14 in the past one year, primarily for work. These men also reported buying sex from FSWs. Given  
15 this scenario, it is imperative that tailored interventions be designed for those involved in manual  
16 labor, who are often difficult to engage in prevention programs. These men could be captured  
17 through networks of labor contractors and migrant populations. Educational campaigns and  
18 counseling are also important to promote condom use for all partners and all types of sex.  
19

20  
21  
22  
23  
24  
25  
26  
27  
28 Our study also found that clients with higher self-perceived risk for HIV were more likely to be  
29 inconsistent condom users. Such an association could be attributed to the fact that knowledge  
30 and perceptions about safe or risky sex may not be sufficient to change an individual's behavior  
31 until self-efficacy and determination in executing a behavior or action are present.<sup>31</sup> Studies that  
32 have used the self-efficacy model among heterosexually active students have documented that  
33 risk perceptions have no influence over condom use, as was noted in this study.<sup>8 32</sup> Another  
34 plausible reason could be the lack of targeted interventions for clients, which, if present, could  
35 have inculcated a sense of responsibility toward their sexual partners.  
36  
37  
38  
39  
40  
41  
42

43  
44 Men who consume alcohol have been found more likely to engage in unprotected sex and anal  
45 sex and have more than 10 FSW partners.<sup>33</sup> A similar association was observed in our study,  
46 where clients who consumed alcohol frequently and reported five or more sexual encounters  
47 were found to inconsistently use condoms during anal intercourse. It seems that the survey has  
48 been able to capture high-risk clients, who have higher volume of sex acts with FSWs, engage in  
49  
50  
51  
52

1  
2  
3  
4  
5  
6  
7  
8  
9 anal intercourse and do not use condoms. Alcohol use and its association with HIV-related  
10 sexual risk is well documented.<sup>33-35</sup> HIV prevention interventions must address this important  
11 issue linked with compromise in safe sex practices/behavior. There is a clear need for HIV  
12 prevention interventions tailored to provide information on alcohol related sexual risk.  
13  
14

15  
16  
17 Although studies from the early 1990s have highlighted anal intercourse as a risk factor for  
18 HIV,<sup>9 36</sup> most AIDS prevention messages targeting heterosexuals continue to focus only on  
19 vaginal and oral sex transmission. Cultural taboos have possibly played a major role against  
20 acknowledging anal sexual practice. Research on vulnerable populations, including FSWs and  
21 youth, indicate that the persons particularly at risk of being infected by or transmitting HIV are  
22 more likely to practice anal intercourse.<sup>37</sup> Furthermore, people with experience in anal  
23 intercourse have been found to take more sexual risk when engaging in vaginal intercourse than  
24 those without anal experience.<sup>8</sup> Another important aspect is the condom negotiating ability of sex  
25 workers with clients. Factors in the physical, economic and policy environment influence  
26 condom use. In addition, the gendered power dynamics and the lack of choice sex workers have  
27 with heterosexual anal intercourse exacerbates their vulnerability. Sex workers need to be  
28 empowered to negotiate condom use with clients and motivate unwilling clients to use condoms  
29 during anal/vaginal sex.<sup>38</sup>  
30  
31  
32  
33  
34  
35  
36  
37  
38  
39  
40  
41  
42  
43  
44

#### 45 **Limitations of the study**

46  
47 Our study has its limitations. For one, both anal intercourse and condom use are self-reported  
48 measures and may, therefore, be influenced by the social desirability bias. As indicated by  
49 previous research, the social desirability bias gives rise to the possibility of underreporting.  
50  
51  
52

1  
2  
3  
4  
5  
6  
7  
8  
9  
10  
11  
12  
13  
14  
15  
16  
17  
18  
19  
20  
21  
22  
23  
24  
25  
26  
27  
28  
29  
30  
31  
32  
33  
34  
35  
36  
37  
38  
39  
40  
41  
42  
43  
44  
45  
46  
47  
48  
49  
50  
51  
52  
53  
54  
55  
56  
57  
58  
59  
60

Given the difficulty in evaluating the magnitude of underreporting, we must be cautious in concluding that anal intercourse is practiced at relatively low rates among this population.

~~Another limitation is that the analysis included only those clients who having reported anal sex which is a small fraction of the total number of clients.~~ Further, we did not have information on anal intercourse with regular female partners to establish concurrency or multidirectional risk during anal intercourse. Also, the survey did not gather information on violence/coercion during anal sex. Future studies need to address these gaps. In addition, qualitative studies are needed to better understand the context in which anal intercourse occurs. In spite of these limitations, this is one of the first studies to document for the clients of FSWs the practice of anal intercourse and the correlates of condom use during anal intercourse.

### Conclusions

The study indicates that HIV prevention programs targeting FSWs and their clients must highlight the increased risk unprotected anal intercourse poses for both self and partners. Condoms and water-based lubricants need to be marketed to reduce these risks. Interventions also need to address factors that influence condom negotiation ability of sex workers. Given the multidirectional risk, condom promotion programs must be extended to include specific information on the benefits of consistent condom use while engaging in anal and other types of sex. Safer sex messages addressing heterosexual anal intercourse need to be incorporated into HIV prevention interventions for both FSWs and their clients. Current prevention programs fail to address this issue. Greater emphasis in AIDS/STI prevention must be given to this typically stigmatized and underreported sexual practice.



### Contributors

SR and KN contributed to concept development, data analysis and interpretation, and writing and finalization of the manuscript. LR, PG, DY, SS, BG, HR, TS, and RSP contributed to concept design, review and finalization of the manuscript.

1  
2  
3  
4  
5  
6  
7  
8  
9  
10  
11  
12  
13  
14  
15  
16  
17  
18  
19  
20  
21  
22  
23  
24  
25  
26  
27  
28  
29  
30  
31  
32  
33  
34  
35  
36  
37  
38  
39  
40  
41  
42  
43  
44  
45  
46  
47  
48  
49  
50  
51  
52  
53  
54  
55  
56  
57  
58  
59  
60**References:**

1. National AIDS Control Organisation MoHaFW, Government of India. 2006. New Delhi, National Behavioural Surveillance Survey (BSS)-Female Sex Workers (FSWs) and their Clients.
2. Subramanian T, Gupte MD, Paranjape RS, et al. HIV, sexually transmitted infections and sexual behaviour of male clients of female sex workers in Andhra Pradesh, Tamil Nadu and Maharashtra, India: results of a cross-sectional survey. *AIDS* 2008 **22** ( 5):S69-79. .
3. McBride KR, Fortenberry JD. Heterosexual anal sexuality and anal sex behaviors: a review. *Journal of sex research* 2010;**47**(2):123-36.
4. Voeller B. AIDS and heterosexual anal intercourse. (0004-0002 (Print)).
5. Suryawanshi D, Bhatnagar T, Deshpande S, et al. Diversity among Clients of Female Sex Workers in India: Comparing Risk Profiles and Intervention Impact by Site of Solicitation. Implications for the Vulnerability of Less Visible Female Sex Workers. *PloS one* 2013;**8**(9):e73470.
6. National AIDS Control Organisation MoHaFW, Government of India. HIV Sentinel Surveillance 2010-11: A Technical Brief. New Delhi, 2012.
7. Samet JH, Pace CA, Cheng DM, et al. Alcohol use and sex risk behaviors among HIV-infected female sex workers (FSWs) and HIV-infected male clients of FSWs in India. *AIDS Behav* 2010;**14** (1):S74-83.
8. Baldwin JI, Baldwin JD. Heterosexual anal intercourse: an understudied, high-risk sexual behavior. *Archives of sexual behavior* 2000;**29**(4):357-73.
9. Halperin DT. Heterosexual anal intercourse: prevalence, cultural factors, and HIV infection and other health risks, Part I. *AIDS patient care and STDs* 1999;**13**(12):717-30.
10. Bradley J, Rajaram S, Moses S, et al. Female sex worker client behaviors lead to condom breakage: a prospective telephone-based survey in Bangalore, South India. *AIDS and behavior* 2013;**17**(2):559-67.
11. Priddy FH, Wakasiaka S, Hoang TD, et al. Anal sex, vaginal practices, and HIV incidence in female sex workers in urban Kenya: implications for the development of intravaginal HIV prevention methods. *AIDS research and human retroviruses* 2011;**27**(10):1067-72.
12. Bradley J, Rajaram S, Alary M, et al. Determinants of condom breakage among female sex workers in Karnataka, India. *BMC public health* 2011;**11 Suppl 6**:S14.
13. Beattie TS, Bradley JE, Vanta UD, et al. Vulnerability re-assessed: the changing face of sex work in Guntur district, Andhra Pradesh. *AIDS care* 2013;**25**(3):378-84.
14. Tucker S, Krishna R, Prabhakar P, et al. Exploring dynamics of anal sex among female sex workers in Andhra Pradesh. *Indian journal of sexually transmitted diseases* 2012;**33**(1):9-15.
15. Schwandt M Fau - Morris C, Morris C Fau - Ferguson A, Ferguson A Fau - Ngugi E, et al. Anal and dry sex in commercial sex work, and relation to risk for sexually transmitted infections and HIV in Meru, Kenya. *Sex Transm Infect* 2006 (1368-4973 (Print)).
16. Heywood W, Smith AM. Anal sex practices in heterosexual and male homosexual populations: a review of population-based data. *Sexual health* 2012;**9**(6):517-26.
17. Veldhuijzen NJ IC, Luchters S, Bosire W, Braunstein S, Chersich M, van de Wijgert J. Anal intercourse among female sex workers in East Africa is associated with other high-risk behaviours for HIV. *Sex Health* 2011 **8**(2):251-4.
18. Patra RK, Mahapatra B, Kovvali D, et al. Anal sex and associated HIV-related sexual risk factors among female sex workers in Andhra Pradesh, India. *Sexual health* 2012;**9**(5):430-7.
19. M. A. A Blind Spot in HIV prevention-Female Anal Sex.

Formatted: Indent: Left: 0", First line: 0", Don't adjust space between Latin and Asian text, Don't adjust space between Asian text and numbers

20. Allen B, Cruz-Valdez A, Rivera-Rivera L, et al. [Affection, kisses, and condoms: the ABC of sexual practices of female sex workers in Mexico City]. *Salud publica de Mexico* 2003;**45 Supp 5**:S594-607.
21. Decker Mr Fau - McCauley HL, McCauley HI Fau - Phuengsamran D, Phuengsamran D Fau - Janyam S, et al. Violence victimisation, sexual risk and sexually transmitted infection symptoms among female sex workers in Thailand. (1472-3263 (Electronic)).
22. Saidel T, Adhikary R, Mainkar M, et al. Baseline integrated behavioural and biological assessment among most at-risk populations in six high-prevalence states of India: design and implementation challenges. *AIDS (London, England)* 2008;**22**:S17-S34 10.1097/01.aids.0000343761.77702.04.
23. Myers T, Rowe CJ, Tudiver FG, et al. HIV, substance use and related behaviour of gay and bisexual men: an examination of the talking sex project cohort. *British journal of addiction* 1992;**87**(2):207-14.
24. Mimiaga MJ, Thomas B, Mayer KH, et al. Alcohol use and HIV sexual risk among MSM in Chennai, India. *International journal of STD & AIDS* 2011;**22**(3):121-5.
25. Greene E, Frye V, Mansergh G, et al. Correlates of unprotected vaginal or anal intercourse with women among substance-using men who have sex with men. *AIDS and behavior* 2013;**17**(3):889-99.
26. Mahapatra B, Lowndes CM, Mohanty SK, et al. Factors associated with risky sexual practices among female sex workers in Karnataka, India. *PloS one* 2013;**8**(4):e62167.
27. Grov C, Wolff M, Smith MD, et al. Male Clients of Male Escorts: Satisfaction, Sexual Behavior, and Demographic Characteristics. *Journal of sex research* 2013.
28. Alexander M, Mainkar M, Deshpande S, et al. Heterosexual anal sex among female sex workers in high HIV prevalence states of India: need for comprehensive intervention. *PloS one* 2014;**9**(2):e88858.
29. Pitts MK, Smith Am Fau - Grierson J, Grierson J Fau - O'Brien M, et al. Who pays for sex and why? An analysis of social and motivational factors associated with male clients of sex workers. (0004-0002 (Print)).
30. Ramanathan S, Chakrapani V, Ramakrishnan L, et al. Consistent condom use with regular, paying, and casual male partners and associated factors among men who have sex with men in Tamil Nadu, India: findings from an assessment of a large-scale HIV prevention program. *BMC public health* 2013;**13**(1):827.
31. Bandura A. Perceived self-efficacy in the exercise of control over AIDS infection. *Evaluation and Program Planning* 1990;**13**(1):9-17.
32. Wulfert E WC. Condom use: a self-efficacy model. *Health Psychol* 1993 **12**(5):346-53.
33. Madhivanan P HA, Gogate A, Stein E, Gregorich S, Setia M, Kumta S, Ekstrand M, Mathur M, Jerajani H, Lindan CP. Alcohol use by men is a risk factor for the acquisition of sexually transmitted infections and human immunodeficiency virus from female sex workers in Mumbai, India. *Sexually transmitted diseases* 2005;**32**(11):685-90.
34. Schensul J, Singh SK, Gupta K, et al. Alcohol and HIV in India: A Review of Current Research and Intervention. *AIDS and behavior* 2010;**14**(1):1-7.
35. Mimiaga MJ, Thomas B, Mayer KH, et al. Alcohol use and HIV sexual risk among MSM in Chennai, India. *International journal of STD & AIDS* 2011;**22**(3):121-25.
36. Erickson PI, Bastani R, Maxwell AE, et al. Prevalence of anal sex among heterosexuals in California and its relationship to other AIDS risk behaviors. *AIDS education and prevention : official publication of the International Society for AIDS Education* 1995;**7**(6):477-93.
37. Stulhofer A, Bacak V. Is anal sex a marker for sexual risk-taking? Results from a population-based study of young Croatian adults. *Sexual health* 2011;**8**(3):384-9.

1  
2  
3  
4  
5  
6  
7  
8  
9  
10  
11  
12  
13  
14  
15  
16  
17  
18  
19  
20  
21  
22  
23  
24  
25  
26  
27  
28  
29  
30  
31  
32  
33  
34  
35  
36  
37  
38  
39  
40  
41  
42  
43  
44  
45  
46  
47  
48  
49  
50  
51  
52  
53  
54  
55  
56  
57  
58  
59  
60

38. Bharat S, Mahapatra B, Roy S, et al. Are Female Sex Workers Able to Negotiate Condom Use with Male Clients? The Case of Mobile FSWs in Four High HIV Prevalence States of India. PLoS one 2013;8(6):e68043.

For peer review only

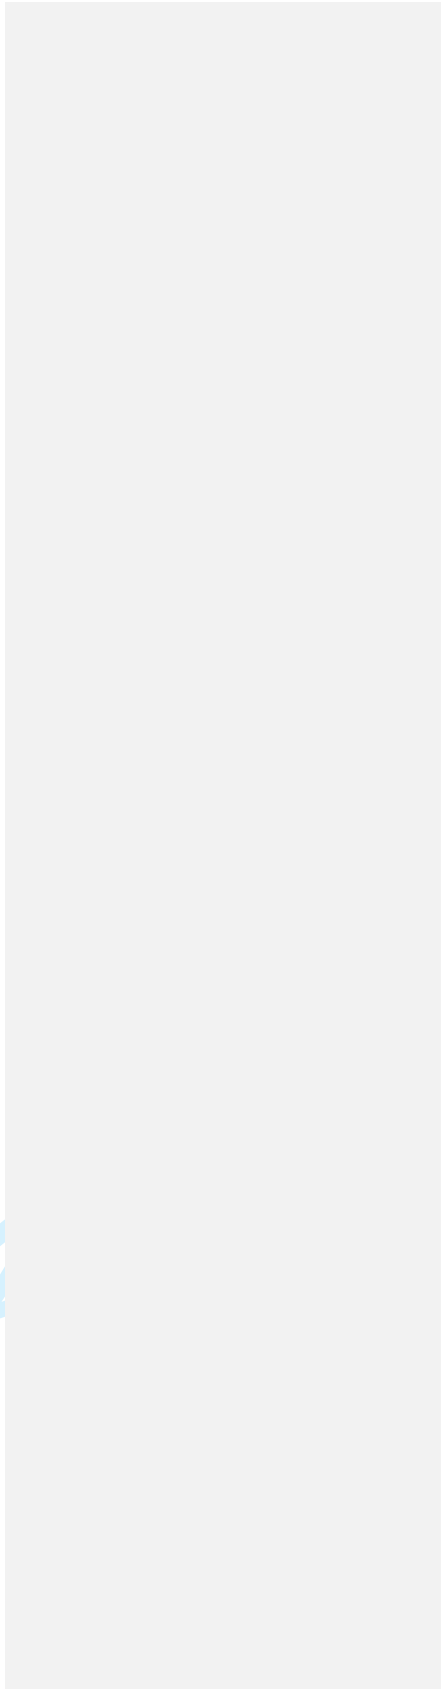

**Table 1: Characteristics of clients of FSWs who reported anal intercourse (past six months) with occasional and regular FSWs and condom use**

| Characteristics                                                 | Consistent condom users<br>(n=397, 51.5%)<br>% (number) | Inconsistent condom users<br>(n=280, 48.4%)<br>% (number) | p-value |
|-----------------------------------------------------------------|---------------------------------------------------------|-----------------------------------------------------------|---------|
| <b>State</b>                                                    |                                                         |                                                           |         |
| Andhra Pradesh                                                  | 75.5(281)                                               | 18.2(58)                                                  | 0.000   |
| Tamil Nadu                                                      | 8.2(43)                                                 | 48.0(84)                                                  |         |
| Maharashtra                                                     | 16.2(73)                                                | 33.7(138)                                                 |         |
| <b>Age</b>                                                      |                                                         |                                                           |         |
| ≤25 years                                                       | 27.1 (117)                                              | 15.6 (53)                                                 | 0.165   |
| 26 years or older                                               | 72.8 (280)                                              | 84.3 (227)                                                |         |
| <b>Education</b>                                                |                                                         |                                                           |         |
| Illiterate                                                      | 14.8 (64)                                               | 49.9 (57)                                                 | 0.003   |
| Literate                                                        | 85.2 (333)                                              | 50.0 (223)                                                |         |
| <b>Marital status</b>                                           |                                                         |                                                           |         |
| Never married/widowed/separated/divorced                        | 29.8 (120)                                              | 20.11 (84)                                                | 0.266   |
| Currently married                                               | 70.1 (277)                                              | 79.8 (196)                                                |         |
| <b>Occupation</b>                                               |                                                         |                                                           |         |
| Non-laborer (students/business/service)                         | 51.4 (214)                                              | 46.1 (90)                                                 | 0.749   |
| Manual laborer (agricultural/non-agricultural labor/cultivator) | 48.5 (181)                                              | 53.8 (190)                                                |         |
| <b>Place solicited FSWs</b>                                     |                                                         |                                                           |         |
| Non-public place (brothel/home/lodge/dhaba)                     | 30.6 (117)                                              | 22.9 (93)                                                 | 0.448   |
| Public place                                                    | 69.3 (278)                                              | 77.1 (186)                                                |         |
| <b>No. of FSWs had sex with in the past one month</b>           |                                                         |                                                           |         |
| ≤3 FSWs                                                         | 72.3 (324)                                              | 86.4 (229)                                                | 0.088   |
| ≥4 FSWs and above                                               | 27.6 (73)                                               | 13.5 (51)                                                 |         |
| <b>No. of sex acts with FSWs in the past one month</b>          |                                                         |                                                           |         |
| ≤4 times                                                        | 73.7 (285)                                              | 76.0 (184)                                                | 0.812   |
| ≥5 and above                                                    | 26.2 (111)                                              | 23.9 (95)                                                 |         |
| <b>Perceive to be at high risk of exposure to HIV</b>           |                                                         |                                                           |         |
| No                                                              | 92.8 (337)                                              | 52.0 (188)                                                | 0.000   |
| Yes                                                             | 7.13 (39)                                               | 47.9 (82)                                                 |         |
| <b>Alcohol user</b>                                             |                                                         |                                                           |         |
| Infrequent drinker                                              | 62.4 (262)                                              | 43.9 (142)                                                | 0.031   |
| Frequent drinker (everyday)                                     | 37.5 (116)                                              | 56.0 (121)                                                |         |
| <b>Ever had anal intercourse with a man/hijra</b>               |                                                         |                                                           |         |
| No                                                              | 60.5 (311)                                              | 81.2 (179)                                                | 0.022   |
| Yes                                                             | 39.4 (86)                                               | 18.7 (101)                                                |         |
| <b>Any HIV/STIs</b>                                             |                                                         |                                                           |         |

Formatted Table

|          |            |            |       |
|----------|------------|------------|-------|
| Negative | 90.2 (367) | 67.6 (253) | 0.085 |
| Positive | 9.7 (30)   | 32.3 (27)  |       |

**Table 2: Independent factors associated with inconsistent condom use during anal intercourse with FSWs in multivariate analysis**

| Characteristics                                                 | Crude odds ratio (95% CI) | p-value | Adjusted odds ratio (95% CI) | p-value |
|-----------------------------------------------------------------|---------------------------|---------|------------------------------|---------|
| Age                                                             |                           |         |                              |         |
| ≤25 years                                                       | Referent                  |         | Referent                     |         |
| 26 years or older                                               | 2.00 (0.74-5.40)          | 0.170   | 2.68 (1.09-6.61)             | 0.032   |
| Education                                                       |                           |         |                              |         |
| Illiterate                                                      | Referent                  |         | Referent                     |         |
| Literate                                                        | 0.17 (0.05-0.59)          | 0.005   | 0.66 (0.28-1.56)             | 0.347   |
| Occupation                                                      |                           |         |                              |         |
| Non-laborer (student/business/service)                          | Referent                  |         | Referent                     |         |
| Manual laborer (agricultural/non-agricultural labor/cultivator) | 1.23 (0.33-4.48)          | 0.749   | 2.43 (1.21-4.90)             | 0.013   |
| Marital status                                                  |                           |         |                              |         |
| Never married/widowed/separated/divorced                        | Referent                  |         | Referent                     |         |
| Currently married                                               | 1.69 (0.66-4.31)          | 0.269   | 0.32 (0.13-0.80)             | 0.015   |
| Place solicited FSWs                                            |                           |         |                              |         |
| Non-public place (brothel/home/lodge/dhaba)                     | Referent                  |         | Referent                     |         |
| Public place                                                    | 1.49 (0.52-4.20)          | 0.449   | 1.26 (0.60-2.61)             | 0.533   |
| No. of FSWs had sex with in the past one month                  |                           |         |                              |         |
| ≤3 FSWs                                                         | Referent                  |         | Referent                     |         |
| ≥4 FSWs and above                                               | 0.41 (0.14-1.16)          | 0.094   | 0.29 (0.10-0.84)             | 0.022   |
| No. of sex acts with FSWs in the past one month                 |                           |         |                              |         |
| ≤4 times                                                        | Referent                  |         | Referent                     |         |
| ≥5 and above                                                    | 0.88 (0.32-2.41)          | 0.812   | 2.53 (0.09-5.90)             | 0.031   |
| Perceive to be at high risk of exposure to HIV                  |                           |         |                              |         |
| No                                                              | Referent                  |         | Referent                     |         |
| Yes                                                             | 11.99 (3.08-46.5)         | 0.000   | 4.82 (1.91-12.14)            | 0.001   |
| Alcohol user                                                    |                           |         |                              |         |
| Infrequent drinker                                              | Referent                  |         | Referent                     |         |
| Frequent drinker (everyday)                                     | 2.11 (1.06-4.20)          | 0.033   | 2.63 (1.46-4.71)             | 0.001   |
| Ever had anal intercourse with a man/hijra                      |                           |         |                              |         |
| No                                                              | Referent                  |         | Referent                     |         |
| Yes                                                             | 0.35 (0.14-0.87)          | 0.025   | 0.76 (0.39-1.50)             | 0.440   |
| Any HIV/STIs                                                    |                           |         |                              |         |

|          |                   |       |                  |       |
|----------|-------------------|-------|------------------|-------|
| Negative | Referent          |       | Referent         |       |
| Positive | 4.42 (0.74-26.32) | 0.102 | 0.73 (0.25-2.12) | 0.568 |

For peer review only

1  
2  
3  
4  
5  
6  
7  
8  
9  
10  
11  
12  
13  
14  
15  
16  
17  
18  
19  
20  
21  
22  
23  
24  
25  
26  
27  
28  
29  
30  
31  
32  
33  
34  
35  
36  
37  
38  
39  
40  
41  
42  
43  
44  
45  
46  
47  
48  
49  
50  
51  
52  
53  
54  
55  
56  
57  
58  
59  
60

**Figure 1:** Conceptual framework of factors related with inconsistent condom use during anal intercourse



179x98mm (300 x 300 DPI)

review only



Figure-2 : Proportions of reported anal-vaginal sex and consistent condom use among male clients of regular and occasional FSWs in Andhra Pradesh (AP) , Maharashtra(MH) and Tamil Nadu(TN)

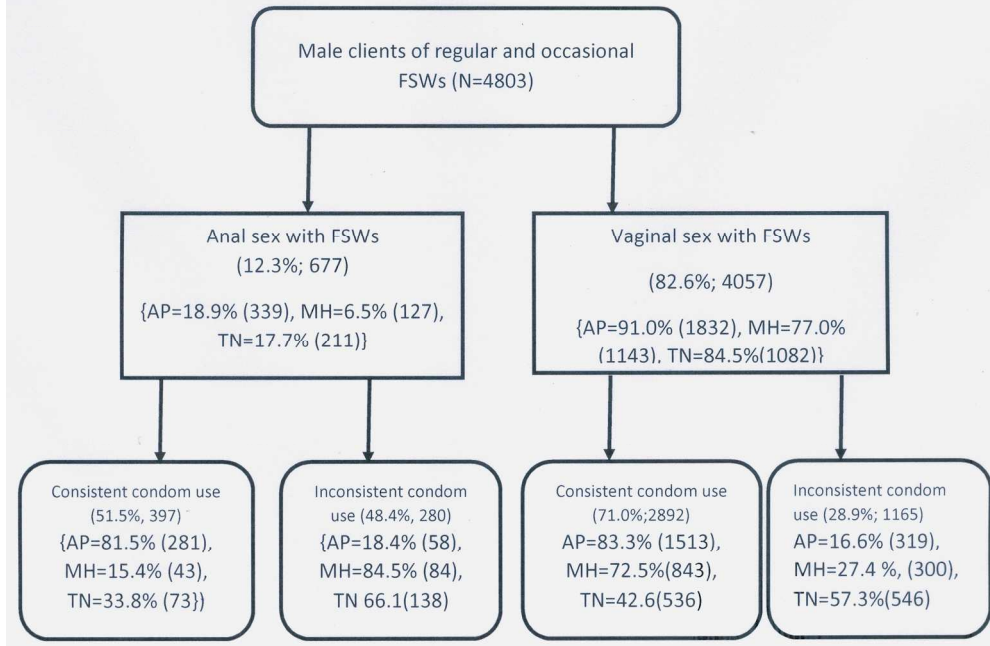

177x129mm (300 x 300 DPI)

View only

STROBE 2007 (v4) Statement—Checklist of items that should be included in reports of cross-sectional studies

| Section/Topic             | Item # | Recommendation                                                                                                                                                                       | Reported on page # |
|---------------------------|--------|--------------------------------------------------------------------------------------------------------------------------------------------------------------------------------------|--------------------|
| Title and abstract        | 1      | (a) Indicate the study’s design with a commonly used term in the title or the abstract                                                                                               | 3                  |
|                           |        | (b) Provide in the abstract an informative and balanced summary of what was done and what was found                                                                                  | 3-4                |
| <b>Introduction</b>       |        |                                                                                                                                                                                      |                    |
| Background/rationale      | 2      | Explain the scientific background and rationale for the investigation being reported                                                                                                 | 6                  |
| Objectives                | 3      | State specific objectives, including any pre-specified hypotheses                                                                                                                    | 7,9                |
| <b>Methods</b>            |        |                                                                                                                                                                                      |                    |
| Study design              | 4      | Present key elements of study design early in the paper                                                                                                                              | 7,8,9              |
| Setting                   | 5      | Describe the setting, locations, and relevant dates, including periods of recruitment, exposure, follow-up, and data collection                                                      | 7,8                |
| Participants              | 6      | (a) Give the eligibility criteria, and the sources and methods of selection of participants                                                                                          | 7,8                |
| Variables                 | 7      | Clearly define all outcomes, exposures, predictors, potential confounders, and effect modifiers. Give diagnostic criteria, if applicable                                             | 9,10               |
| Data sources/ measurement | 8*     | For each variable of interest, give sources of data and details of methods of assessment (measurement). Describe comparability of assessment methods if there is more than one group | 9,10               |
| Bias                      | 9      | Describe any efforts to address potential sources of bias                                                                                                                            | -                  |
| Study size                | 10     | Explain how the study size was arrived at                                                                                                                                            | -                  |
| Quantitative variables    | 11     | Explain how quantitative variables were handled in the analyses. If applicable, describe which groupings were chosen and why                                                         | 10,11              |
| Statistical methods       | 12     | (a) Describe all statistical methods, including those used to control for confounding                                                                                                | 10,11              |
|                           |        | (b) Describe any methods used to examine subgroups and interactions                                                                                                                  | -                  |
|                           |        | (c) Explain how missing data were addressed                                                                                                                                          | -                  |
|                           |        | (d) If applicable, describe analytical methods taking account of sampling strategy                                                                                                   | -                  |
|                           |        | (e) Describe any sensitivity analyses                                                                                                                                                | -                  |
| <b>Results</b>            |        |                                                                                                                                                                                      |                    |

1  
2  
3  
4  
5  
6  
7  
8  
9  
10  
11  
12  
13  
14  
15  
16  
17  
18  
19  
20  
21  
22  
23  
24  
25  
26  
27  
28  
29  
30  
31  
32  
33  
34  
35  
36  
37  
38  
39  
40  
41  
42  
43  
44  
45  
46  
47  
48  
49

|                          |     |                                                                                                                                                                                                              |        |
|--------------------------|-----|--------------------------------------------------------------------------------------------------------------------------------------------------------------------------------------------------------------|--------|
| Participants             | 13* | (a) Report numbers of individuals at each stage of study—eg numbers potentially eligible, examined for eligibility, confirmed eligible, included in the study, completing follow-up, and analysed            | 11, 12 |
|                          |     | (b) Give reasons for non-participation at each stage                                                                                                                                                         | -      |
|                          |     | (c) Consider use of a flow diagram                                                                                                                                                                           | -      |
| Descriptive data         | 14* | (a) Give characteristics of study participants (eg demographic, clinical, social) and information on exposures and potential confounders                                                                     | 11, 12 |
|                          |     | (b) Indicate number of participants with missing data for each variable of interest                                                                                                                          | -      |
| Outcome data             | 15* | Report numbers of outcome events or summary measures                                                                                                                                                         | 11, 12 |
| Main results             | 16  | (a) Give unadjusted estimates and, if applicable, confounder-adjusted estimates and their precision (eg, 95% confidence interval). Make clear which confounders were adjusted for and why they were included | 11, 12 |
|                          |     | (b) Report category boundaries when continuous variables were categorized                                                                                                                                    | -      |
|                          |     | (c) If relevant, consider translating estimates of relative risk into absolute risk for a meaningful time period                                                                                             | -      |
| Other analyses           | 17  | Report other analyses done—eg analyses of subgroups and interactions, and sensitivity analyses                                                                                                               | -      |
| <b>Discussion</b>        |     |                                                                                                                                                                                                              |        |
| Key results              | 18  | Summarise key results with reference to study objectives                                                                                                                                                     | 12, 13 |
| Limitations              | 19  | Discuss limitations of the study, taking into account sources of potential bias or imprecision. Discuss both direction and magnitude of any potential bias                                                   | 15     |
| Interpretation           | 20  | Give a cautious overall interpretation of results considering objectives, limitations, multiplicity of analyses, results from similar studies, and other relevant evidence                                   | 15, 16 |
| Generalisability         | 21  | Discuss the generalisability (external validity) of the study results                                                                                                                                        | 15, 16 |
| <b>Other information</b> |     |                                                                                                                                                                                                              |        |
| Funding                  | 22  | Give the source of funding and the role of the funders for the present study and, if applicable, for the original study on which the present article is based                                                | 17     |

\*Give information separately for cases and controls in case-control studies and, if applicable, for exposed and unexposed groups in cohort and cross-sectional studies.

**Note:** An Explanation and Elaboration article discusses each checklist item and gives methodological background and published examples of transparent reporting. The STROBE checklist is best used in conjunction with this article (freely available on the Web sites of PLoS Medicine at <http://www.plosmedicine.org/>, Annals of Internal Medicine at <http://www.annals.org/>, and Epidemiology at <http://www.epidem.com/>). Information on the STROBE Initiative is available at [www.strobe-statement.org](http://www.strobe-statement.org).

# BMJ Open

## Inconsistent condom use by male clients during anal intercourse with occasional and regular female sex workers (FSWs): Survey findings from southern states of India

|                                 |                                                                                                                                                                                                                                                                                                                                                                                                                                                                                                                                                                                                                                                                                           |
|---------------------------------|-------------------------------------------------------------------------------------------------------------------------------------------------------------------------------------------------------------------------------------------------------------------------------------------------------------------------------------------------------------------------------------------------------------------------------------------------------------------------------------------------------------------------------------------------------------------------------------------------------------------------------------------------------------------------------------------|
| Journal:                        | <i>BMJ Open</i>                                                                                                                                                                                                                                                                                                                                                                                                                                                                                                                                                                                                                                                                           |
| Manuscript ID:                  | bmjopen-2014-005166.R3                                                                                                                                                                                                                                                                                                                                                                                                                                                                                                                                                                                                                                                                    |
| Article Type:                   | Research                                                                                                                                                                                                                                                                                                                                                                                                                                                                                                                                                                                                                                                                                  |
| Date Submitted by the Author:   | 14-Oct-2014                                                                                                                                                                                                                                                                                                                                                                                                                                                                                                                                                                                                                                                                               |
| Complete List of Authors:       | Ramanathan, Shreena; FHI 360, M&E, Knowledge Network, DAKSH Nagarajan, Karikalan; National AIDS Research Institute, Knowledge Network<br>Ramakrishnan, Lakshmi; FHI 360, M&E, Knowledge Network<br>Mainkar, Mandar; Formerly with National AIDS Research Institute, Goswami, Prabuddhagopal; FHI 360, M&E<br>Yadav, Diwakar; Formerly with FHI 360, M&E<br>Sen, Shrabanti; FHI 360, M&E<br>George, Bitra; FHI 360, Country Director<br>Rachakulla, Hari; National Institute of Nutrition (NIN), Community Studies<br>Subramanian, Thilakavath; National Institute of Epidemiology (NIE), Social & Behavioural Sciences<br>Paranjape, Ramesh; National AIDS Research Institute, Immunology |
| <b>Primary Subject Heading</b>: | HIV/AIDS                                                                                                                                                                                                                                                                                                                                                                                                                                                                                                                                                                                                                                                                                  |
| Secondary Subject Heading:      | Epidemiology, HIV/AIDS, Public health, Sexual health                                                                                                                                                                                                                                                                                                                                                                                                                                                                                                                                                                                                                                      |
| Keywords:                       | EPIDEMIOLOGY, HIV & AIDS < INFECTIOUS DISEASES, Public health < INFECTIOUS DISEASES                                                                                                                                                                                                                                                                                                                                                                                                                                                                                                                                                                                                       |
|                                 |                                                                                                                                                                                                                                                                                                                                                                                                                                                                                                                                                                                                                                                                                           |

SCHOLARONE™  
Manuscripts

**Title: Inconsistent condom use by male clients during anal intercourse with occasional and regular female sex workers (FSWs): Survey findings from southern states of India**

**Corresponding author**

Shreena Ramanathan  
Technical Manager, M&E, Knowledge Network, DAKSH  
FHI 360, India  
H-5 (Ground Floor), Green Park Extension,  
New Delhi - 110016,  
India  
E-mail: [sramanathan@fhi360.org](mailto:sramanathan@fhi360.org)  
Ph: 91-11-40487777  
Fax: 91-11-26172646

**Co-Authors**

Karikalan Nagarajan, National AIDS Research Institute (NARI) Pune, India  
Lakshmi Ramakrishnan, FHI 360, New Delhi, India  
Mandar K Mainkar, National AIDS Research Institute (NARI) Pune, India  
Prabuddhagopal Goswami, FHI 360, New Delhi, India  
Diwakar Yadav, formerly with FHI 360, New Delhi, India  
Shrabanti Sen, FHI 360, New Delhi, India  
Bitra George, FHI 360, New Delhi, India  
Harikumar Rachakulla, National Institute of Nutrition (NIN), Hyderabad, India  
Thilakavathi Subramanian, National Institute of Epidemiology (NIE), Chennai, India  
Ramesh S. Paranjape, National AIDS Research Institute (NARI) Pune, India

**Emails:**

KN: [drkarikalan82@gmail.com](mailto:drkarikalan82@gmail.com)  
LR: [ramaklak@gmail.com](mailto:ramaklak@gmail.com)  
MM: [mandar5670@gmail.com](mailto:mandar5670@gmail.com)  
PG: [pgoswami@fhi360.org](mailto:pgoswami@fhi360.org)  
DY: [yadavdiwakar7@gmail.com](mailto:yadavdiwakar7@gmail.com)  
SS: [SSen@fhi360.org](mailto:SSen@fhi360.org)  
BG: [BGeorge@fhi360.org](mailto:BGeorge@fhi360.org)  
HR: [drharikumar1959@yahoo.co.in](mailto:drharikumar1959@yahoo.co.in)  
TS: [thilakavathi\\_s@rediffmail.com](mailto:thilakavathi_s@rediffmail.com)  
RSP: [rparanjape@nariindia.org](mailto:rparanjape@nariindia.org)

1  
2  
3 **Keywords:** clients of female sex workers, FSW, anal intercourse, condom use, HIV, STI, India,  
4  
5 Maharashtra, Tamil Nadu, Andhra Pradesh  
6  
7

8  
9 **Word count: 3004** (Introduction, methods, results and conclusion)  
10  
11  
12  
13  
14  
15  
16  
17  
18  
19  
20  
21  
22  
23  
24  
25  
26  
27  
28  
29  
30  
31  
32  
33  
34  
35  
36  
37  
38  
39  
40  
41  
42  
43  
44  
45  
46  
47  
48  
49  
50  
51  
52  
53  
54  
55  
56  
57  
58  
59  
60

For peer review only

## **Abstract**

### **Objectives**

Self-reported anal intercourse by female sex workers (FSWs) documented in recent studies from India range between 11.9% and 22.0%. However, comparable data on anal intercourse and condom use from male clients of FSWs is lacking. Using data from a bio-behavioral survey (2009–2010), we examined prevalence of anal intercourse, male clients' self-reported inconsistent condom use during anal intercourse with FSWs, and correlates of this behavior in India's high-prevalence southern states ( Andhra Pradesh, Maharashtra and Tamil Nadu combined).

### **Methods**

Using two-stage time location cluster sampling, we recruited 4,803 clients of FSWs, ages 18–60 years, who had purchased sex from an FSW in the past month. After obtaining informed consent, respondents were interviewed and tested for HIV and STIs (syphilis, gonorrhoea and chlamydia). Logistic regression analysis was used to identify the factors associated with inconsistent condom use during anal intercourse (in the past six months) with FSWs.

### **Results**

Overall, 12.4% clients reported anal intercourse in the past six months, of which 48.4% used condoms inconsistently. Clients of FSWs who were ages 26 years or older (AOR: 2.68,  $p=0.032$ ); employed as manual laborers (AOR: 2.43,  $p=0.013$ ); consumed alcohol (AOR: 2.63,  $p=0.001$ ), reported five or more sex acts with FSWs in the past month (AOR: 2.53,  $p=0.031$ ) and perceived

1  
2  
3 themselves to be at higher risk for HIV (AOR: 4.82, p=0.001) were more likely to inconsistently  
4 use condoms during anal intercourse.  
5  
6  
7

## 8 9 **Conclusion**

10 The results suggest that sex workers and their clients commonly practice anal intercourse, but a  
11 relatively high proportion of clients do not consistently use condoms, leading to a greater risk of  
12 acquiring HIV and its further transmission to other male and female sexual partners. Given the  
13 multidirectional risk, safer sex communication on heterosexual anal intercourse must be  
14 incorporated into HIV prevention programs.  
15  
16  
17  
18  
19  
20  
21  
22  
23  
24  
25

## 26 27 **Article summary**

28 This paper discusses the prevalence of anal intercourse, male clients' self-reported inconsistent  
29 condom use during anal intercourse with FSWs, and correlates of this behavior in Andhra  
30 Pradesh, Maharashtra and Tamil Nadu.  
31  
32  
33  
34  
35  
36  
37  
38  
39

## 40 41 **Key messages**

- 42 • Sex workers and their clients commonly practice anal intercourse, but a relatively high  
43 proportion of clients do not consistently use condoms, resulting in a greater risk of  
44 acquiring HIV and its further transmission to other male and female sexual partners.  
45  
46  
47  
48
- 49 • Safer sex messages on heterosexual anal intercourse should be incorporated into HIV  
50 prevention interventions for both FSWs and their clients.  
51  
52  
53  
54  
55  
56  
57  
58  
59  
60



### Strengths and limitations of this study

- Using data from a large scale multi-site bio-behavioral survey, this paper discusses the prevalence and practice of unprotected anal intercourse among clients of sex workers in high HIV prevalent southern states of India.
- Both anal intercourse and condom use are self-reported measures and may therefore be influenced by the social desirability bias, resulting in under or over reporting of the phenomena.

## Introduction

Heterosexual anal intercourse (HAI) is an understudied risk behavior among clients of female sex workers (CFSWs), a vulnerable population that has been identified as a critical bridge group in HIV transmission.<sup>1 2</sup> HAI has thus far received little attention, even though depictions of heterosexual anal intercourse can be found in art and artifacts dating to antiquity.<sup>3</sup> The silence on this front is perhaps linked to society's discomfort with HAI, coupled with the notion that anal intercourse is a homosexual male practice, not heterosexual.<sup>3 4</sup> Most HIV transmission in India occurs through heterosexual networks<sup>5 6</sup>, and unprotected, heterosexual transactional sex plays a central role in the spread of HIV.<sup>7</sup> Previous studies indicate that condom usage is higher for vaginal intercourse than for heterosexual anal sex.<sup>8 9</sup> Furthermore, studies have documented condom breakage when condoms were used during anal intercourse, thereby increasing chances of infection.<sup>10-12</sup> While behavioral interventions targeting FSWs have substantially reduced HIV prevalence in general, the FSWs' HIV and STI vulnerability remains high due to the increasing trend of risky behaviors, such as unprotected anal intercourse with clients.<sup>13 14</sup>

Given the high vulnerabilities associated with HAI in commercial and non-commercial sex settings, a few research studies have assessed anal intercourse prevalence and associated factors among FSWs and the general population.<sup>15-17</sup> Similar to findings from other countries in commercial sex settings, studies on FSWs in India have also documented increased trend for anal intercourse with clients.<sup>13 14 18 19</sup> In India and elsewhere, the primary reason for FSWs selling anal sex is the extra money it brings from clients. It is also linked to associated factors such as economic hardship, debt status and lack of alternate source of income.<sup>14 18</sup> Anal intercourse is usually demand driven, not preferred by FSWs and at times even forced by clients through violence.<sup>15 18 20 21</sup> Both intervention and research in the area are extensive among FSWs.

1  
2  
3 However, there is paucity of behavioral research on clients' self-reported anal intercourse and  
4 condom use during anal intercourse. This paper examines the correlates of clients' inconsistent  
5 condom use during anal intercourse with FSWs. The study has used cross-sectional survey data  
6 collected from clients of FSW in three high HIV prevalence states of India.  
7  
8  
9  
10  
11

## 12 **Materials and Methods**

### 13 *Data source*

14  
15  
16  
17  
18  
19  
20 Data were derived from a cross-sectional bio-behavioral survey (called integrated behavioral and  
21 biological assessment [IBBA]) that was conducted among clients of FSWs as part of the  
22 evaluation of a large-scale HIV prevention program in 12 districts across the three Indian states  
23 of Andhra Pradesh, Maharashtra and Tamil Nadu during 2009–2010. Men, of ages 18–60 years,  
24 who reported purchasing sex from an FSW in the past month, were considered eligible  
25 respondents. These eligible respondents were identified with the help of FSWs, brokers, pimps,  
26 etc., at places of FSW solicitation/entertainment and recruited for the study. The survey used a  
27 two-stage cluster sampling design with time location clusters (TLCs) as primary sampling units.  
28 Clusters were randomly selected by using probability proportional to size (PPS) in the first stage.  
29 From these selected clusters, respondents were then selected through systematic random  
30 sampling in the second stage. Behavioral information was collected through a structured,  
31 interviewer-administered questionnaire, and blood and urine samples were collected to test for  
32 HIV and other STIs (gonorrhoea, chlamydia, syphilis). A detailed description of the survey  
33 methodology is available elsewhere.<sup>22</sup>  
34  
35  
36  
37  
38  
39  
40  
41  
42  
43  
44  
45  
46  
47  
48  
49  
50  
51  
52

53 Prior oral or written informed consent was obtained from all respondents. The survey was  
54 approved by the ethics committees of the participating institutes of Indian Council of Medical  
55  
56  
57  
58  
59  
60

1  
2  
3 Research (National AIDS Research Institute, Pune; National Institute of Nutrition, Hyderabad;  
4 and National Institute of Epidemiology, Chennai) and FHI 360 (Protection of Human Subjects  
5  
6  
7  
8  
9  
10  
11  
12  
13  
14  
15  
16  
17  
18  
19  
20  
21  
22  
23  
24  
25  
26  
27  
28  
29  
30  
31  
32  
33  
34  
35  
36  
37  
38  
39  
40  
41  
42  
43  
44  
45  
46  
47  
48  
49  
50  
51  
52  
53  
54  
55  
56  
57  
58  
59  
60

Research (National AIDS Research Institute, Pune; National Institute of Nutrition, Hyderabad; and National Institute of Epidemiology, Chennai) and FHI 360 (Protection of Human Subjects Committee).

### *Conceptual framework*

For the current analysis, a conceptual framework (Figure 1, illustrated below) was used as a device to explain and identify the different factors that may be associated with inconsistent condom use during anal intercourse with FSWs.

Inconsistent condom use during anal intercourse was the dependent variable. The independent variables were selected based on their contextual relation with the dependent variable. Based on prior research, individual factors such as risk perception, alcohol use,<sup>23-25</sup> frequency of commercial sex, volume of sex acts,<sup>14 26</sup> having male/transgender partners,<sup>27</sup> place of soliciting FSWs<sup>5</sup> and having HIV/STIs,<sup>18</sup> which are widely seen to influence condom use among different high-risk population groups, were included. We hypothesized that clients who were married, consumed alcohol, solicited FSWs from public places and had a higher number of FSW partners were more likely to be inconsistent condom users. These clients were also more likely to have experienced anal sex with a man. Most current interventions for clients of FSWs are limited to condom promotion and distribution, and no intervention for FSWs or their clients currently addresses heterosexual anal intercourse, which has significant implications for HIV prevention programming.

Based on the rationale described above, we grouped the different indicators into two categories:

a) socio-demographic and b) HIV-related sexual risk behaviors.

## Measures

### *Dependent variable:*

Inconsistent condom use during anal intercourse - This behavior was assessed by asking: “How often did you use a condom while having anal intercourse with your regular and occasional FSWs in the past six months?” The clients who reported using condoms most of the time, sometimes or never were considered inconsistent condom users (coded as ‘1’), while those who reported using condoms every time during anal intercourse were considered consistent condom users (coded as ‘0’).

### *Independent variables:*

The independent variables included age in completed years; education (illiterate, can read only, can read and write); occupation (pre-coded as unemployed, student, domestic servant, agricultural labor, non-agricultural/casual labor, skilled/semi-skilled labor, petty businessman/shop owner, large businessman/shop owner, bus/truck drivers/helpers, other transport workers, service and others); marital status (currently married, separated, divorced, widowed, never married, no answer); place of soliciting FSWs (pre-coded as bar/night club, public place, street, park, railway station, agent, brothel, hotel/lodge, home, *dhaba*, by telephone, other); number of FSWs had sex with in the past month; number of sex acts with FSWs in the past month; ever had anal intercourse with a man/transgender (yes/no); self-risk perception (yes/no); alcohol consumption (everyday, at least once a week, less than once a week, never, no answer); and having HIV or any STI (those having HIV, syphilis, gonorrhoea or chlamydia were grouped into positive and the rest as negative).

1  
2  
3 Given the skewed distribution, all the variables were dichotomized for the analysis. Age was  
4 categorized into  $\leq 25$  years and 26 years or older; education was grouped into literate and  
5 illiterate; occupation into laborers (manual) and non-laborers, marital status as currently married  
6 and never married/widowed/separated/divorced; place of soliciting FSWs into public place and  
7 non-public place; number of FSWs had sex with as  $\leq 3$  FSWs and  $\geq 4$  FSWs; number of sex acts  
8 as  $\leq 4$  times and  $\geq 5$  times; and alcohol use into frequent and infrequent drinkers.  
9  
10  
11  
12  
13  
14  
15  
16  
17

### 18 *Statistical analysis*

19  
20  
21 Descriptive statistics were calculated and used to measure the levels of inconsistent condom use  
22 (during anal intercourse) and other selected variables. Chi-square tests were used to assess the  
23 significance of bivariate relationships between demographic characteristics of clients and their  
24 condom use behaviour during anal intercourse. Multiple logistic regression model was used to  
25 identify factors that were independently predictive of inconsistent condom use during anal  
26 intercourse, with adjusted odds ratio calculated at a significance level less than 0.05. Statistical  
27 calculations were conducted using aggregated data of clients of FSWs from all three states, since  
28 the eligibility criteria for respondents and the methods of sampling and behavioural data  
29 collection were standardized and same in all the three states. Analysis was done by applying  
30 appropriate weights. At the district level, weighting was based on the cluster effect of the sample.  
31 At the aggregate level, standardized weights were calculated by combining the 12 districts.  
32 STATA/SE version 11® (Stata Corporation, College Station, TX) was used for all the analyses.  
33  
34  
35  
36  
37  
38  
39  
40  
41  
42  
43  
44  
45  
46  
47  
48  
49

### 50 **Results**

51  
52  
53  
54 Of the 4,803 clients of FSWs (Andhra Pradesh (n=2016), Tamil Nadu (n=1217), and  
55 Maharashtra (n=1570), 12.3% reported having had anal intercourse in the past six months; 48.4%  
56  
57  
58  
59  
60

1  
2  
3 among them used condoms inconsistently during anal intercourse. In Andhra Pradesh,  
4 Maharashtra and Tamil Nadu those reporting anal sex were 18.9%, 6.5% and 17.7% respectively.  
5  
6 Condom use during anal and vaginal sex varied widely in the different states (**Figure 2**) and  
7  
8 since only a small proportion of clients in each of these states reported anal sex, the findings are  
9  
10 based on an aggregate analysis. .  
11  
12  
13  
14  
15  
16  
17  
18  
19

20 As presented in Table 1, the bivariate analysis shows that the majority of inconsistent condom  
21 users were ages 26 years or older (84.3%), married (79.8 %) and solicited FSWs from public  
22 places (77.1 %). Literacy levels were lower among inconsistent condom users than among  
23 consistent condom users (50.0 % vs. 85.2 %,  $p=0.003$ ). Similarly, a lower proportion of  
24 inconsistent condom users reported having had anal intercourse with a man than consistent  
25 condom users (18.7 % vs. 39.4 %,  $p=0.022$ ). A higher proportion of inconsistent condom users  
26 consumed alcohol frequently (56.0 % vs. 37.5%,  $p=0.031$ ) and considered themselves at risk of  
27 exposure to HIV than consistent condom users (47.9 % vs. 7.13 %,  $p=0.000$ ). More than 30 %  
28 inconsistent condom users tested positive for HIV/STI, compared to a smaller proportion of  
29 consistent condom users (32.3 % vs. 9.7 %,  $p=0.085$ ), but the association is not significant.  
30  
31  
32  
33  
34  
35  
36  
37  
38  
39  
40  
41  
42

43 Table 2 shows the independent factors associated with inconsistent condom use during anal  
44 intercourse with FSWs. Clients of FSWs who were ages 26 years or older (AOR: 2.68,  $p=0.032$ ),  
45 employed as manual laborers (AOR: 2.43,  $p=0.013$ ), consumed alcohol (AOR: 2.63,  $p=0.001$ ),  
46 reported five or more sex acts with FSWs in the past month (AOR: 2.53,  $p=0.031$ ), and perceived  
47 themselves to be at higher risk for HIV (AOR: 4.82,  $p=0.001$ ) were more likely to inconsistently  
48 use condoms during anal intercourse than their counterparts. On the other hand, clients who were  
49  
50  
51  
52  
53  
54  
55  
56  
57  
58  
59  
60

1  
2  
3 currently married (AOR: 0.41,  $p=0.056$ ) and had sex with more number of FSWs ( $\geq 4$  and above)  
4  
5 in the past month were less likely to inconsistently use condoms during anal intercourse than  
6  
7 those never married/separated/divorced/widowed and who had sex with less than three FSWs.  
8  
9 Testing positive for HIV or STI was not found to be associated with inconsistency in condom use  
10  
11 during anal intercourse. Similarly, factors such as literacy level, place where the client solicited  
12  
13 FSWs and whether he had had anal sex with a male/hijra partner were not associated with  
14  
15 inconsistency in condom use during anal intercourse.  
16  
17  
18  
19  
20  
21  
22  
23

## 24 Discussion

25  
26  
27 IBBA, one of the few surveys in India to study large samples of clients of FSWs, has  
28  
29 documented the practice of unprotected anal intercourse in three high HIV prevalence states of  
30  
31 the country. Its findings show that anal intercourse is a substantial part of the commercial sex  
32  
33 activity in India, with about 12 percent clients reporting experience of anal intercourse and  
34  
35 nearly half of them not using condoms during anal intercourse with FSWs. The profile of clients  
36  
37 who reported having unprotected anal intercourse with FSW varied from clients who did not  
38  
39 report unprotected sex. Clients who were 26 years or older, frequently used alcohol, worked as  
40  
41 manual laborers and reported higher number of sex acts with FSWs were at an increased risk of  
42  
43 unprotected anal intercourse.  
44  
45  
46  
47  
48

49 In the absence of comparable estimates on anal intercourse from client surveys in India, we  
50  
51 examined the estimates available from studies on FSWs<sup>13 14 18 28</sup> and the reported prevalence  
52  
53 ranged from 11.9% to 22.0% . It was apparent from these studies that there is a high demand for  
54  
55 anal sex from male clients of FSWs (above 40.0%). When compared with the prevalence  
56  
57  
58  
59  
60



1  
2  
3 reported by FSWs in these studies, the prevalence reported by clients in the current analysis  
4  
5 is comparable and an almost similar prevalence was reported by FSWs in round one of IBBA<sup>28</sup>.  
6  
7  
8 Anal sex is certainly stigmatized among FSWs and they have a reason to under report this  
9  
10 behavior, however, we don't know if it is similar for men.  
11  
12

13  
14 The finding that older clients are at a higher risk of inconsistent condom use has been reported  
15  
16 previously. Inconsistent condom use during vaginal intercourse with FSWs was found to be  
17  
18 significantly associated with older clients.<sup>2</sup> The average age of marriage for Indian men is  
19  
20 documented to be 26 years, and a majority of men (clients of FSWs) in this sample were married.  
21  
22  
23 A possible explanation for this risky behavior among older men could be the need to fulfill  
24  
25 sexual desires or experimentation, followed by the belief that paying for sex would be less  
26  
27 troublesome and more entertaining than sexual involvement with a non-sex worker.<sup>29</sup> It could  
28  
29 also be plausible that inability of the older men to maintain erections may have resulted in  
30  
31 inconsistent use of condoms during anal sex when compared to younger men. Older men who  
32  
33 have sex with men have also been found to practice risky sexual behavior like inconsistent  
34  
35 condom use.<sup>30</sup>  
36  
37  
38

39  
40 Likewise, clients who were manual laborers were more likely to be inconsistent condom users,  
41  
42 compared to those in other occupations (white collar workers). The manual laborers in the  
43  
44 current study include agricultural and non-agricultural laborers and cultivators. It is possible that  
45  
46 many of these men migrated for work and stay away from their families. Additional analysis was  
47  
48 undertaken to understand this dimension better; more than 50 % respondents reported travelling  
49  
50 in the past one year, primarily for work. These men also reported buying sex from FSWs. Given  
51  
52 this scenario, it is imperative that tailored interventions be designed for those involved in manual  
53  
54 labor, who are often difficult to engage in prevention programs. These men could be captured  
55  
56  
57  
58  
59  
60

1  
2  
3 through networks of labor contractors and migrant populations. Educational campaigns and  
4 counseling are also important to promote condom use for all partners and all types of sex.  
5  
6

7  
8 Our study also found that clients with higher self-perceived risk for HIV were more likely to be  
9 inconsistent condom users. Such an association could be attributed to the fact that knowledge  
10 and perceptions about safe or risky sex may not be sufficient to change an individual's behavior  
11 until self-efficacy and determination in executing a behavior or action are present.<sup>31</sup> Studies that  
12 have used the self-efficacy model among heterosexually active students have documented that  
13 risk perceptions have no influence over condom use, as was noted in this study.<sup>8 32</sup> Another  
14 plausible reason could be the lack of targeted interventions for clients, which, if present, could  
15 have inculcated a sense of responsibility toward their sexual partners.  
16  
17  
18  
19  
20  
21  
22  
23  
24  
25

26  
27  
28 Men who consume alcohol have been found more likely to engage in unprotected sex and anal  
29 sex and have more than 10 FSW partners.<sup>33</sup> A similar association was observed in our study,  
30 where clients who consumed alcohol frequently and reported five or more sexual encounters  
31 were found to inconsistently use condoms during anal intercourse. It seems that the survey has  
32 been able to capture high-risk clients, who have higher volume of sex acts with FSWs, engage in  
33 anal intercourse and do not use condoms. Alcohol use and its association with HIV-related  
34 sexual risk is well documented.<sup>33-35</sup> HIV prevention interventions must address this important  
35 issue linked with compromise in safe sex practices/behavior. There is a clear need for HIV  
36 prevention interventions tailored to provide information on alcohol related sexual risk.  
37  
38  
39  
40  
41  
42  
43  
44  
45  
46  
47  
48

49  
50 Although studies from the early 1990s have highlighted anal intercourse as a risk factor for  
51 HIV,<sup>9 36</sup> most AIDS prevention messages targeting heterosexuals continue to focus only on  
52 vaginal and oral sex transmission. Cultural taboos have possibly played a major role against  
53 acknowledging anal sexual practice. Research on vulnerable populations, including FSWs and  
54  
55  
56  
57  
58  
59  
60

1  
2  
3 youth, indicate that the persons particularly at risk of being infected by or transmitting HIV are  
4 more likely to practice anal intercourse.<sup>37</sup> Furthermore, people with experience in anal  
5 intercourse have been found to take more sexual risk when engaging in vaginal intercourse than  
6 those without anal experience.<sup>8</sup> Another important aspect is the condom negotiating ability of sex  
7 workers with clients. Factors in the physical, economic and policy environment influence  
8 condom use. In addition, the gendered power dynamics and the lack of choice sex workers have  
9 with heterosexual anal intercourse exacerbates their vulnerability. Sex workers need to be  
10 empowered to negotiate condom use with clients and motivate unwilling clients to use condoms  
11 during anal/vaginal sex.<sup>38</sup>  
12  
13  
14  
15  
16  
17  
18  
19  
20  
21  
22  
23  
24  
25  
26  
27  
28

### 29 **Limitations of the study**

30  
31  
32 Our study has its limitations. For one, both anal intercourse and condom use are self-reported  
33 measures and may, therefore, be influenced by the social desirability bias. As indicated by  
34 previous research, the social desirability bias gives rise to the possibility of underreporting.  
35  
36 Given the difficulty in evaluating the magnitude of underreporting, we must be cautious in  
37 concluding that anal intercourse is practiced at relatively low rates among this population.  
38  
39 Further, we did not have information on anal intercourse with regular female partners to establish  
40 concurrency or multidirectional risk during anal intercourse. Also, the survey did not gather  
41 information on violence/coercion during anal sex. Future studies need to address these gaps. In  
42 addition, qualitative studies are needed to better understand the context in which anal intercourse  
43 occurs. In spite of these limitations, this is one of the first studies to document for the clients of  
44 FSWs the practice of anal intercourse and the correlates of condom use during anal intercourse.  
45  
46  
47  
48  
49  
50  
51  
52  
53  
54  
55  
56  
57  
58  
59  
60

## Conclusions

The study indicates that HIV prevention programs targeting FSWs and their clients must highlight the increased risk unprotected anal intercourse poses for both self and partners. Condoms and water-based lubricants need to be marketed to reduce these risks. Interventions also need to address factors that influence condom negotiation ability of sex workers. Given the multidirectional risk, condom promotion programs must be extended to include specific information on the benefits of consistent condom use while engaging in anal and other types of sex. Safer sex messages addressing heterosexual anal intercourse need to be incorporated into HIV prevention interventions for both FSWs and their clients. Current prevention programs fail to address this issue. Greater emphasis in AIDS/STI prevention must be given to this typically stigmatized and underreported sexual practice.

### **Competing interests**

None declared

### **Acknowledgement**

The authors wish to thank the Avahan state implementation partners for their partnership in this study. We thank Dr. Stephen Schensul, Dr. Niranjan Saggurti and Dr. Bidhu Bhushan Mahapatra for providing critical inputs during concept development and analysis. We also extend our gratitude to Dr. Steve Mills from FHI 360, Asia Pacific Regional Office, Bangkok, Thailand, for his inputs in the finalization of this manuscript. Finally, we thank the respondents for their participation in the study.

An earlier version (abstract) of this research paper was presented at the STI & AIDS World Congress 2013 in Vienna, Austria.

### **Funding**

The Bill & Melinda Gates Foundation funded this research through Avahan: the India AIDS Initiative. The views expressed herein are those of the authors and do not necessarily reflect the official policy or position of the foundation and Avahan.

### **Ethics approval**

Clearance for the study was taken from ethics committees of the participating institutes of Indian Council of Medical Research (National AIDS Research Institute, Pune; National Institute of

1  
2  
3 Nutrition, Hyderabad; and National Institute of Epidemiology, Chennai) and FHI 360 (Protection  
4  
5 of Human Subjects Committee).  
6  
7  
8  
9

### 10 11 **Data sharing statement**

12  
13 IBBA Round 1 (2005-07) and Round 2 (2009-2010) data are available on request from the  
14  
15 National AIDS Research Institute (NARI). The request form can be accessed from:  
16

17  
18 [http://www.nari-icmr.res.in/pdf/IBBA/Agreement-for-accessing-raw-IBBA%20\\_R1-&-](http://www.nari-icmr.res.in/pdf/IBBA/Agreement-for-accessing-raw-IBBA%20_R1-&-R2_data.pdf)  
19  
20 [R2\\_data.pdf](http://www.nari-icmr.res.in/pdf/IBBA/Agreement-for-accessing-raw-IBBA%20_R1-&-R2_data.pdf)

21  
22 Other IBBA-related documents are available at:

23  
24 [www.ibbainfo.in](http://www.ibbainfo.in)  
25  
26  
27

### 28 29 **Contributors**

30  
31  
32 SR and KN contributed to concept development, data analysis and interpretation, and writing and  
33  
34 finalization of the manuscript. LR, PG, DY, SS, BG, HR, TS, and RSP contributed to concept  
35  
36 design, review and finalization of the manuscript.  
37  
38  
39  
40  
41  
42  
43  
44  
45  
46  
47  
48  
49  
50  
51  
52  
53  
54  
55  
56  
57  
58  
59  
60

## References:

1. National AIDS Control Organisation MoHaFW, Government of India. 2006. New Delhi, National Behavioural Surveillance Survey (BSS)-Female Sex Workers (FSWs) and their Clients.
2. Subramanian T, Gupte MD, Paranjape RS, et al. HIV, sexually transmitted infections and sexual behaviour of male clients of female sex workers in Andhra Pradesh, Tamil Nadu and Maharashtra, India: results of a cross-sectional survey. *AIDS* 2008 **22** ( 5):S69-79. .
3. McBride KR, Fortenberry JD. Heterosexual anal sexuality and anal sex behaviors: a review. *Journal of sex research* 2010;**47**(2):123-36.
4. Voeller B. AIDS and heterosexual anal intercourse. (0004-0002 (Print)).
5. Suryawanshi D, Bhatnagar T, Deshpande S, et al. Diversity among Clients of Female Sex Workers in India: Comparing Risk Profiles and Intervention Impact by Site of Solicitation. Implications for the Vulnerability of Less Visible Female Sex Workers. *PloS one* 2013;**8**(9):e73470.
6. National AIDS Control Organisation MoHaFW, Government of India. HIV Sentinel Surveillance 2010-11: A Technical Brief. New Delhi, 2012.
7. Samet JH, Pace CA, Cheng DM, et al. Alcohol use and sex risk behaviors among HIV-infected female sex workers (FSWs) and HIV-infected male clients of FSWs in India. *AIDS Behav* 2010;**14** (1):S74-83.
8. Baldwin JI, Baldwin JD. Heterosexual anal intercourse: an understudied, high-risk sexual behavior. *Archives of sexual behavior* 2000;**29**(4):357-73.
9. Halperin DT. Heterosexual anal intercourse: prevalence, cultural factors, and HIV infection and other health risks, Part I. *AIDS patient care and STDs* 1999;**13**(12):717-30.
10. Bradley J, Rajaram S, Moses S, et al. Female sex worker client behaviors lead to condom breakage: a prospective telephone-based survey in Bangalore, South India. *AIDS and behavior* 2013;**17**(2):559-67.
11. Priddy FH, Wakasiaka S, Hoang TD, et al. Anal sex, vaginal practices, and HIV incidence in female sex workers in urban Kenya: implications for the development of intravaginal HIV prevention methods. *AIDS research and human retroviruses* 2011;**27**(10):1067-72.
12. Bradley J, Rajaram S, Alary M, et al. Determinants of condom breakage among female sex workers in Karnataka, India. *BMC public health* 2011;**11 Suppl 6**:S14.
13. Beattie TS, Bradley JE, Vanta UD, et al. Vulnerability re-assessed: the changing face of sex work in Guntur district, Andhra Pradesh. *AIDS care* 2013;**25**(3):378-84.
14. Tucker S, Krishna R, Prabhakar P, et al. Exploring dynamics of anal sex among female sex workers in Andhra Pradesh. *Indian journal of sexually transmitted diseases* 2012;**33**(1):9-15.
15. Schwandt M Fau - Morris C, Morris C Fau - Ferguson A, Ferguson A Fau - Ngugi E, et al. Anal and dry sex in commercial sex work, and relation to risk for sexually transmitted infections and HIV in Meru, Kenya. *Sex Transm Infect* 2006 (1368-4973 (Print)).
16. Heywood W, Smith AM. Anal sex practices in heterosexual and male homosexual populations: a review of population-based data. *Sexual health* 2012;**9**(6):517-26.
17. Veldhuijzen NJ IC, Luchters S, Bosire W, Braunstein S, Chersich M, van de Wijgert J. Anal intercourse among female sex workers in East Africa is associated with other high-risk behaviours for HIV. *Sex Health* 2011 **8**(2):251-4.
18. Patra RK, Mahapatra B, Kovvali D, et al. Anal sex and associated HIV-related sexual risk factors among female sex workers in Andhra Pradesh, India. *Sexual health* 2012;**9**(5):430-7.
19. M. A. A Blind Spot in HIV prevention-Female Anal Sex.
20. Allen B, Cruz-Valdez A, Rivera-Rivera L, et al. [Affection, kisses, and condoms: the ABC of sexual practices of female sex workers in Mexico City]. *Salud publica de Mexico* 2003;**45 Supp 5**:S594-607.

- 1
  - 2
  - 3
  - 4
  - 5
  - 6
  - 7
  - 8
  - 9
  - 10
  - 11
  - 12
  - 13
  - 14
  - 15
  - 16
  - 17
  - 18
  - 19
  - 20
  - 21
  - 22
  - 23
  - 24
  - 25
  - 26
  - 27
  - 28
  - 29
  - 30
  - 31
  - 32
  - 33
  - 34
  - 35
  - 36
  - 37
  - 38
  - 39
  - 40
  - 41
  - 42
  - 43
  - 44
  - 45
  - 46
  - 47
  - 48
  - 49
  - 50
  - 51
  - 52
  - 53
  - 54
  - 55
  - 56
  - 57
  - 58
  - 59
  - 60
21. Decker Mr Fau - McCauley HL, McCauley HI Fau - Phuengsamran D, Phuengsamran D Fau - Janyam S, et al. Violence victimisation, sexual risk and sexually transmitted infection symptoms among female sex workers in Thailand. (1472-3263 (Electronic)).
22. Saidel T, Adhikary R, Mainkar M, et al. Baseline integrated behavioural and biological assessment among most at-risk populations in six high-prevalence states of India: design and implementation challenges. *AIDS (London, England)* 2008;**22**:S17-S34 10.1097/01.aids.0000343761.77702.04.
23. Myers T, Rowe CJ, Tudiver FG, et al. HIV, substance use and related behaviour of gay and bisexual men: an examination of the talking sex project cohort. *British journal of addiction* 1992;**87**(2):207-14.
24. Mimiaga MJ, Thomas B, Mayer KH, et al. Alcohol use and HIV sexual risk among MSM in Chennai, India. *International journal of STD & AIDS* 2011;**22**(3):121-5.
25. Greene E, Frye V, Mansergh G, et al. Correlates of unprotected vaginal or anal intercourse with women among substance-using men who have sex with men. *AIDS and behavior* 2013;**17**(3):889-99.
26. Mahapatra B, Lowndes CM, Mohanty SK, et al. Factors associated with risky sexual practices among female sex workers in Karnataka, India. *PloS one* 2013;**8**(4):e62167.
27. Grov C, Wolff M, Smith MD, et al. Male Clients of Male Escorts: Satisfaction, Sexual Behavior, and Demographic Characteristics. *Journal of sex research* 2013.
28. Alexander M, Mainkar M, Deshpande S, et al. Heterosexual anal sex among female sex workers in high HIV prevalence states of India: need for comprehensive intervention. *PloS one* 2014;**9**(2):e88858.
29. Pitts MK, Smith Am Fau - Grierson J, Grierson J Fau - O'Brien M, et al. Who pays for sex and why? An analysis of social and motivational factors associated with male clients of sex workers. (0004-0002 (Print)).
30. Ramanathan S, Chakrapani V, Ramakrishnan L, et al. Consistent condom use with regular, paying, and casual male partners and associated factors among men who have sex with men in Tamil Nadu, India: findings from an assessment of a large-scale HIV prevention program. *BMC public health* 2013;**13**(1):827.
31. Bandura A. Perceived self-efficacy in the exercise of control over AIDS infection. *Evaluation and Program Planning* 1990;**13**(1):9-17.
32. Wulfert E WC. Condom use: a self-efficacy model. *Health Psychol* 1993 **12**(5):346-53.
33. Madhivanan P HA, Gogate A, Stein E, Gregorich S, Setia M, Kumta S, Ekstrand M, Mathur M, Jerajani H, Lindan CP. Alcohol use by men is a risk factor for the acquisition of sexually transmitted infections and human immunodeficiency virus from female sex workers in Mumbai, India. *Sexually transmitted diseases* 2005;**32**(11):685-90.
34. Schensul J, Singh SK, Gupta K, et al. Alcohol and HIV in India: A Review of Current Research and Intervention. *AIDS and behavior* 2010;**14**(1):1-7.
35. Mimiaga MJ, Thomas B, Mayer KH, et al. Alcohol use and HIV sexual risk among MSM in Chennai, India. *International journal of STD & AIDS* 2011;**22**(3):121-25.
36. Erickson PI, Bastani R, Maxwell AE, et al. Prevalence of anal sex among heterosexuals in California and its relationship to other AIDS risk behaviors. *AIDS education and prevention : official publication of the International Society for AIDS Education* 1995;**7**(6):477-93.
37. Stulhofer A, Bacak V. Is anal sex a marker for sexual risk-taking? Results from a population-based study of young Croatian adults. *Sexual health* 2011;**8**(3):384-9.
38. Bharat S, Mahapatra B, Roy S, et al. Are Female Sex Workers Able to Negotiate Condom Use with Male Clients? The Case of Mobile FSWs in Four High HIV Prevalence States of India. *PloS one* 2013;**8**(6):e68043.



1  
2  
3  
4  
5  
6  
7  
8  
9  
10  
11  
12  
13  
14  
15  
16  
17  
18  
19  
20  
21  
22  
23  
24  
25  
26  
27  
28  
29  
30  
31  
32  
33  
34  
35  
36  
37  
38  
39  
40  
41  
42  
43  
44  
45  
46  
47  
48  
49  
50  
51  
52  
53  
54  
55  
56  
57  
58  
59  
60

For peer review only

**Table 1: Characteristics of clients of FSWs who reported anal intercourse (past six months) with occasional and regular FSWs and condom use**

| Characteristics                                                 | Consistent condom users<br>(n=397, 51.5%)<br>% (number) | Inconsistent condom users<br>(n=280, 48.4%)<br>% (number) | p-value |
|-----------------------------------------------------------------|---------------------------------------------------------|-----------------------------------------------------------|---------|
| Age                                                             |                                                         |                                                           |         |
| ≤25 years                                                       | 27.1 (117)                                              | 15.6 (53)                                                 | 0.165   |
| 26 years or older                                               | 72.8 (280)                                              | 84.3 (227)                                                |         |
| Education                                                       |                                                         |                                                           |         |
| Illiterate                                                      | 14.8 (64)                                               | 49.9 (57)                                                 | 0.003   |
| Literate                                                        | 85.2 (333)                                              | 50.0 (223)                                                |         |
| Marital status                                                  |                                                         |                                                           |         |
| Never married/widowed/separated/divorced                        | 29.8 (120)                                              | 20.11 (84)                                                | 0.266   |
| Currently married                                               | 70.1 (277)                                              | 79.8 (196)                                                |         |
| Occupation                                                      |                                                         |                                                           |         |
| Non-laborer (students/business/service)                         | 51.4 (214)                                              | 46.1 (90)                                                 | 0.749   |
| Manual laborer (agricultural/non-agricultural labor/cultivator) | 48.5 (181)                                              | 53.8 (190)                                                |         |
| Place solicited FSWs                                            |                                                         |                                                           |         |
| Non-public place (brothel/home/lodge/dhaba)                     | 30.6 (117)                                              | 22.9 (93)                                                 | 0.448   |
| Public place                                                    | 69.3 (278)                                              | 77.1 (186)                                                |         |
| No. of FSWs had sex with in the past one month                  |                                                         |                                                           |         |
| ≤3 FSWs                                                         | 72.3 (324)                                              | 86.4 (229)                                                | 0.088   |
| ≥4 FSWs and above                                               | 27.6 (73)                                               | 13.5 (51)                                                 |         |
| No. of sex acts with FSWs in the past one month                 |                                                         |                                                           |         |
| ≤4 times                                                        | 73.7 (285)                                              | 76.0 (184)                                                | 0.812   |
| ≥5 and above                                                    | 26.2 (111)                                              | 23.9 (95)                                                 |         |
| Perceive to be at high risk of exposure to HIV                  |                                                         |                                                           |         |
| No                                                              | 92.8 (337)                                              | 52.0 (188)                                                | 0.000   |
| Yes                                                             | 7.13 (39)                                               | 47.9 (82)                                                 |         |
| Alcohol user                                                    |                                                         |                                                           |         |
| Infrequent drinker                                              | 62.4 (262)                                              | 43.9 (142)                                                | 0.031   |
| Frequent drinker (everyday)                                     | 37.5 (116)                                              | 56.0 (121)                                                |         |
| Ever had anal intercourse with a man/hijra                      |                                                         |                                                           |         |
| No                                                              | 60.5 (311)                                              | 81.2 (179)                                                | 0.022   |
| Yes                                                             | 39.4 (86)                                               | 18.7 (101)                                                |         |
| Any HIV/STIs                                                    |                                                         |                                                           |         |
| Negative                                                        | 90.2 (367)                                              | 67.6 (253)                                                | 0.085   |
| Positive                                                        | 9.7 (30)                                                | 32.3 (27)                                                 |         |

**Table 2: Independent factors associated with inconsistent condom use during anal intercourse with FSWs in multivariate analysis**

| Characteristics                                                     | Crude odds ratio<br>(95% CI) | p-value | Adjusted odds ratio<br>(95% CI) | p-value |
|---------------------------------------------------------------------|------------------------------|---------|---------------------------------|---------|
| Age                                                                 |                              |         |                                 |         |
| ≤25 years                                                           | Referent                     |         | Referent                        |         |
| 26 years or older                                                   | 2.00 (0.74-5.40)             | 0.170   | 2.68 (1.09-6.61)                | 0.032   |
| Education                                                           |                              |         |                                 |         |
| Illiterate                                                          | Referent                     |         | Referent                        |         |
| Literate                                                            | 0.17 (0.05-0.59)             | 0.005   | 0.66 (0.28-1.56)                | 0.347   |
| Occupation                                                          |                              |         |                                 |         |
| Non-laborer<br>(student/business/service)                           | Referent                     |         | Referent                        |         |
| Manual laborer (agricultural/non-<br>agricultural labor/cultivator) | 1.23 (0.33-4.48)             | 0.749   | 2.43 (1.21-4.90)                | 0.013   |
| Marital status                                                      |                              |         |                                 |         |
| Never married/widowed/separated<br>/divorced                        | Referent                     |         | Referent                        |         |
| Currently married                                                   | 1.69 (0.66-4.31)             | 0.269   | 0.32 (0.13-0.80)                | 0.015   |
| Place solicited FSWs                                                |                              |         |                                 |         |
| Non-public place<br>(brothel/home/lodge/dhaba)                      | Referent                     |         | Referent                        |         |
| Public place                                                        | 1.49 (0.52-4.20)             | 0.449   | 1.26 (0.60-2.61)                | 0.533   |
| No. of FSWs had sex with in the past<br>one month                   |                              |         |                                 |         |
| ≤3 FSWs                                                             | Referent                     |         | Referent                        |         |
| ≥ 4 FSWs and above                                                  | 0.41 (0.14-1.16)             | 0.094   | 0.29 (0.10-0.84)                | 0.022   |
| No. of sex acts with FSWs in the past<br>one month                  |                              |         |                                 |         |
| ≤ 4 times                                                           | Referent                     |         | Referent                        |         |
| ≥ 5 and above                                                       | 0.88 (0.32-2.41)             | 0.812   | 2.53 (0.09-5.90)                | 0.031   |
| Perceive to be at high risk of<br>exposure to HIV                   |                              |         |                                 |         |
| No                                                                  | Referent                     |         | Referent                        |         |
| Yes                                                                 | 11.99 (3.08-46.5)            | 0.000   | 4.82 (1.91-12.14)               | 0.001   |
| Alcohol user                                                        |                              |         |                                 |         |
| Infrequent drinker                                                  | Referent                     |         | Referent                        |         |
| Frequent drinker (everyday)                                         | 2.11 (1.06-4.20)             | 0.033   | 2.63 (1.46-4.71)                | 0.001   |
| Ever had anal intercourse with a<br>man/hijra                       |                              |         |                                 |         |
| No                                                                  | Referent                     |         | Referent                        |         |
| Yes                                                                 | 0.35 (0.14-0.87)             | 0.025   | 0.76 (0.39-1.50)                | 0.440   |
| Any HIV/STIs                                                        |                              |         |                                 |         |
| Negative                                                            | Referent                     |         | Referent                        |         |
| Positive                                                            | 4.42 (0.74-26.32)            | 0.102   | 0.73 (0.25-2.12)                | 0.568   |

1  
2  
3  
4  
5  
6  
7  
8  
9  
10  
11  
12  
13  
14  
15  
16  
17  
18  
19  
20  
21  
22  
23  
24  
25  
26  
27  
28  
29  
30  
31  
32  
33  
34  
35  
36  
37  
38  
39  
40  
41  
42  
43  
44  
45  
46  
47  
48  
49  
50  
51  
52  
53  
54  
55  
56  
57  
58  
59  
60

For peer review only

1  
2  
3 **Title: Inconsistent condom use by male clients during anal intercourse with occasional and**  
4 **regular female sex workers (FSWs): Survey findings from southern states of India**  
5  
6  
7  
8  
9

10  
11 **Corresponding author**  
12

13 Shreena Ramanathan  
14 Technical Manager, M&E, Knowledge Network, DAKSH  
15 FHI 360, India  
16 H-5 (Ground Floor), Green Park Extension,  
17 New Delhi - 110016,  
18 India  
19 E-mail: [sramanathan@fhi360.org](mailto:sramanathan@fhi360.org)  
20 Ph: 91-11-40487777  
21 Fax: 91-11-26172646  
22  
23  
24  
25

26 **Co-Authors**

27 Karikalan Nagarajan, National AIDS Research Institute (NARI) Pune, India  
28 Lakshmi Ramakrishnan, FHI 360, New Delhi, India  
29 Mandar K Mainkar, National AIDS Research Institute (NARI) Pune, India  
30 Prabuddhagopal Goswami, FHI 360, New Delhi, India  
31 Diwakar Yadav, formerly with FHI 360, New Delhi, India  
32 Shrabanti Sen, FHI 360, New Delhi, India  
33 Bitra George, FHI 360, New Delhi, India  
34 Harikumar Rachakulla, National Institute of Nutrition (NIN), Hyderabad, India  
35 Thilakavathi Subramanian, National Institute of Epidemiology (NIE), Chennai, India  
36 Ramesh S. Paranjape, National AIDS Research Institute (NARI) Pune, India  
37  
38  
39  
40  
41

42 **Emails:**

43  
44 KN: [drkarikalan82@gmail.com](mailto:drkarikalan82@gmail.com)  
45 LR: [ramaklak@gmail.com](mailto:ramaklak@gmail.com)  
46 MM: [mandar5670@gmail.com](mailto:mandar5670@gmail.com)  
47 PG: [pgoswami@fhi360.org](mailto:pgoswami@fhi360.org)  
48 DY: [yadavdiwakar7@gmail.com](mailto:yadavdiwakar7@gmail.com)  
49 SS: [SSen@fhi360.org](mailto:SSen@fhi360.org)  
50 BG: [BGeorge@fhi360.org](mailto:BGeorge@fhi360.org)  
51 HR: [drharikumar1959@yahoo.co.in](mailto:drharikumar1959@yahoo.co.in)  
52 TS: [thilakavathi\\_s@rediffmail.com](mailto:thilakavathi_s@rediffmail.com)  
53 RSP: [rparanjape@nariindia.org](mailto:rparanjape@nariindia.org)  
54  
55  
56  
57  
58  
59  
60

1  
2  
3 **Keywords:** clients of female sex workers, FSW, anal intercourse, condom use, HIV, STI, India,  
4  
5 Maharashtra, Tamil Nadu, Andhra Pradesh  
6  
7

8  
9 **Word count: 3004** (Introduction, methods, results and conclusion)  
10  
11

### 12 13 **Competing interests**

14  
15 None declared  
16  
17

### 18 19 **Acknowledgement**

20  
21  
22 The authors wish to thank the Avahan state implementation partners for their partnership in this  
23 study. We thank Dr. Stephen Schensul, Dr. Niranjan Saggurti and Dr. Bidhu Bhushan Mahapatra  
24 for providing critical inputs during concept development and analysis. We also extend our  
25 gratitude to Dr. Steve Mills from FHI 360, Asia Pacific Regional Office, Bangkok, Thailand, for  
26 his inputs in the finalization of this manuscript. Finally, we thank the respondents for their  
27 participation in the study.  
28  
29

30  
31 An earlier version (abstract) of this research paper was presented at the STI & AIDS World  
32 Congress 2013 in Vienna, Austria.  
33  
34  
35

### 36 37 **Funding**

38  
39 The Bill & Melinda Gates Foundation funded this research through Avahan: the India AIDS  
40 Initiative. The views expressed herein are those of the authors and do not necessarily reflect the  
41 official policy or position of the foundation and Avahan.  
42  
43  
44  
45  
46  
47  
48  
49  
50  
51  
52  
53  
54  
55  
56  
57  
58  
59  
60

### **Ethics approval**

Clearance for the study was taken from ethics committees of the participating institutes of Indian Council of Medical Research (National AIDS Research Institute, Pune; National Institute of Nutrition, Hyderabad; and National Institute of Epidemiology, Chennai) and FHI 360 (Protection of Human Subjects Committee).

### **Data sharing statement**

IBBA Round 1 (2005-07) and Round 2 (2009-2010) data are available on request from the National AIDS Research Institute (NARI). The request form can be accessed from:

[http://www.nari-icmr.res.in/pdf/IBBA/Agreement-for-accessing-raw-IBBA%20\\_R1-&-R2\\_data.pdf](http://www.nari-icmr.res.in/pdf/IBBA/Agreement-for-accessing-raw-IBBA%20_R1-&-R2_data.pdf)

Other IBBA-related documents are available at:

[www.ibbainfo.in](http://www.ibbainfo.in)

## **Abstract**

### **Objectives**

Self-reported anal intercourse by female sex workers (FSWs) documented in recent studies from India range between 11.9% and 22.0%. However, comparable data on anal intercourse and condom use from male clients of FSWs is lacking. Using data from a bio-behavioral survey (2009–2010), we examined prevalence of anal intercourse, male clients' self-reported inconsistent condom use during anal intercourse with FSWs, and correlates of this behavior in India's high-prevalence southern states ( Andhra Pradesh, Maharashtra and Tamil Nadu combined).

### **Methods**

Using two-stage time location cluster sampling, we recruited 4,803 clients of FSWs, ages 18–60 years, who had purchased sex from an FSW in the past month. After obtaining informed consent, respondents were interviewed and tested for HIV and STIs (syphilis, gonorrhea and chlamydia). Logistic regression analysis was used to identify the factors associated with inconsistent condom use during anal intercourse (in the past six months) with FSWs.

### **Results**

Overall, 12.4% clients reported anal intercourse in the past six months, of which 48.4% used condoms inconsistently. Clients of FSWs who were ages 26 years or older (AOR: 2.68, p=0.032); employed as manual laborers (AOR: 2.43, p=0.013); consumed alcohol (AOR: 2.63, p=0.001), reported five or more sex acts with FSWs in the past month (AOR: 2.53, p=0.031) and perceived



1  
2  
3 themselves to be at higher risk for HIV (AOR: 4.82, p=0.001) were more likely to inconsistently  
4 use condoms during anal intercourse.  
5  
6  
7

## 8 9 **Conclusion**

10 The results suggest that sex workers and their clients commonly practice anal intercourse, but a  
11 relatively high proportion of clients do not consistently use condoms, leading to a greater risk of  
12 acquiring HIV and its further transmission to other male and female sexual partners. Given the  
13 multidirectional risk, safer sex communication on heterosexual anal intercourse must be  
14 incorporated into HIV prevention programs.  
15  
16  
17  
18  
19  
20  
21  
22  
23  
24  
25

## 26 27 **Article summary**

28 This paper discusses the prevalence of anal intercourse, male clients' self-reported inconsistent  
29 condom use during anal intercourse with FSWs, and correlates of this behavior in Andhra  
30 Pradesh, Maharashtra and Tamil Nadu.  
31  
32  
33  
34  
35  
36  
37  
38  
39

## 40 41 **Key messages**

- 42 • Sex workers and their clients commonly practice anal intercourse, but a relatively high  
43 proportion of clients do not consistently use condoms, resulting in a greater risk of  
44 acquiring HIV and its further transmission to other male and female sexual partners.  
45  
46  
47  
48
- 49 • Safer sex messages on heterosexual anal intercourse should be incorporated into HIV  
50 prevention interventions for both FSWs and their clients.  
51  
52  
53  
54  
55  
56  
57  
58  
59  
60

### Strengths and limitations of this study

- Using data from a large scale multi-site bio-behavioral survey, this paper discusses the prevalence and practice of unprotected anal intercourse among clients of sex workers in high HIV prevalent southern states of India.
- Both anal intercourse and condom use are self-reported measures and may therefore be influenced by the social desirability bias, resulting in under or over reporting of the phenomena.

## Introduction

Heterosexual anal intercourse (HAI) is an understudied risk behavior among clients of female sex workers (CFSWs), a vulnerable population that has been identified as a critical bridge group in HIV transmission.<sup>1 2</sup> HAI has thus far received little attention, even though depictions of heterosexual anal intercourse can be found in art and artifacts dating to antiquity.<sup>3</sup> The silence on this front is perhaps linked to society's discomfort with HAI, coupled with the notion that anal intercourse is a homosexual male practice, not heterosexual.<sup>3 4</sup> Most HIV transmission in India occurs through heterosexual networks<sup>5 6</sup>, and unprotected, heterosexual transactional sex plays a central role in the spread of HIV.<sup>7</sup> Previous studies indicate that condom usage is higher for vaginal intercourse than for heterosexual anal sex.<sup>8 9</sup> Furthermore, studies have documented condom breakage when condoms were used during anal intercourse, thereby increasing chances of infection.<sup>10-12</sup> While behavioral interventions targeting FSWs have substantially reduced HIV prevalence in general, the FSWs' HIV and STI vulnerability remains high due to the increasing trend of risky behaviors, such as unprotected anal intercourse with clients.<sup>13 14</sup>

Given the high vulnerabilities associated with HAI in commercial and non-commercial sex settings, a few research studies have assessed anal intercourse prevalence and associated factors among FSWs and the general population.<sup>15-17</sup> Similar to findings from other countries in commercial sex settings, studies on FSWs in India have also documented increased trend for anal intercourse with clients.<sup>13 14 18 19</sup> In India and elsewhere, the primary reason for FSWs selling anal sex is the extra money it brings from clients. It is also linked to associated factors such as economic hardship, debt status and lack of alternate source of income.<sup>14 18</sup> Anal intercourse is usually demand driven, not preferred by FSWs and at times even forced by clients through violence.<sup>15 18 20 21</sup> Both intervention and research in the area are extensive among FSWs.

1  
2  
3 However, there is paucity of behavioral research on clients' self-reported anal intercourse and  
4 condom use during anal intercourse. This paper examines the correlates of clients' inconsistent  
5 condom use during anal intercourse with FSWs. The study has used cross-sectional survey data  
6 collected from clients of FSW in three high HIV prevalence states of India.  
7  
8  
9  
10  
11

## 12 **Materials and Methods**

### 13 *Data source*

14  
15  
16  
17  
18  
19  
20 Data were derived from a cross-sectional bio-behavioral survey (called integrated behavioral and  
21 biological assessment [IBBA]) that was conducted among clients of FSWs as part of the  
22 evaluation of a large-scale HIV prevention program in 12 districts across the three Indian states  
23 of Andhra Pradesh, Maharashtra and Tamil Nadu during 2009–2010. Men, of ages 18–60 years,  
24 who reported purchasing sex from an FSW in the past month, were considered eligible  
25 respondents. These eligible respondents were identified with the help of FSWs, brokers, pimps,  
26 etc., at places of FSW solicitation/entertainment and recruited for the study. The survey used a  
27 two-stage cluster sampling design with time location clusters (TLCs) as primary sampling units.  
28 Clusters were randomly selected by using probability proportional to size (PPS) in the first stage.  
29 From these selected clusters, respondents were then selected through systematic random  
30 sampling in the second stage. Behavioral information was collected through a structured,  
31 interviewer-administered questionnaire, and blood and urine samples were collected to test for  
32 HIV and other STIs (gonorrhoea, chlamydia, syphilis). A detailed description of the survey  
33 methodology is available elsewhere.<sup>22</sup>  
34  
35  
36  
37  
38  
39  
40  
41  
42  
43  
44  
45  
46  
47  
48  
49  
50  
51

52  
53 Prior oral or written informed consent was obtained from all respondents. The survey was  
54 approved by the ethics committees of the participating institutes of Indian Council of Medical  
55  
56  
57  
58  
59  
60

1  
2  
3 Research (National AIDS Research Institute, Pune; National Institute of Nutrition, Hyderabad;  
4 and National Institute of Epidemiology, Chennai) and FHI 360 (Protection of Human Subjects  
5  
6  
7  
8 Committee).

### 11 12 *Conceptual framework*

13  
14  
15  
16 For the current analysis, a conceptual framework (Figure 1, illustrated below) was used as a  
17  
18 device to explain and identify the different factors that may be associated with inconsistent  
19  
20 condom use during anal intercourse with FSWs.

21  
22  
23  
24 Inconsistent condom use during anal intercourse was the dependent variable. The independent  
25  
26 variables were selected based on their contextual relation with the dependent variable. Based on  
27  
28 prior research, individual factors such as risk perception, alcohol use,<sup>23-25</sup> frequency of  
29  
30 commercial sex, volume of sex acts,<sup>14 26</sup> having male/transgender partners,<sup>27</sup> place of soliciting  
31  
32 FSWs<sup>5</sup> and having HIV/STIs,<sup>18</sup> which are widely seen to influence condom use among different  
33  
34 high-risk population groups, were included. We hypothesized that clients who were married,  
35  
36 consumed alcohol, solicited FSWs from public places and had a higher number of FSW partners  
37  
38 were more likely to be inconsistent condom users. These clients were also more likely to have  
39  
40 experienced anal sex with a man. Most current interventions for clients of FSWs are limited to  
41  
42 condom promotion and distribution, and no intervention for FSWs or their clients currently  
43  
44 addresses heterosexual anal intercourse, which has significant implications for HIV prevention  
45  
46 programming.

47  
48  
49  
50  
51  
52  
53 Based on the rationale described above, we grouped the different indicators into two categories:

54  
55 a) socio-demographic and b) HIV-related sexual risk behaviors.  
56  
57  
58  
59  
60

## Measures

### *Dependent variable:*

Inconsistent condom use during anal intercourse - This behavior was assessed by asking: “How often did you use a condom while having anal intercourse with your regular and occasional FSWs in the past six months?” The clients who reported using condoms most of the time, sometimes or never were considered inconsistent condom users (coded as ‘1’), while those who reported using condoms every time during anal intercourse were considered consistent condom users (coded as ‘0’).

### *Independent variables:*

The independent variables included age in completed years; education (illiterate, can read only, can read and write); occupation (pre-coded as unemployed, student, domestic servant, agricultural labor, non-agricultural/casual labor, skilled/semi-skilled labor, petty businessman/shop owner, large businessman/shop owner, bus/truck drivers/helpers, other transport workers, service and others); marital status (currently married, separated, divorced, widowed, never married, no answer); place of soliciting FSWs (pre-coded as bar/night club, public place, street, park, railway station, agent, brothel, hotel/lodge, home, *dhaba*, by telephone, other); number of FSWs had sex with in the past month; number of sex acts with FSWs in the past month; ever had anal intercourse with a man/transgender (yes/no); self-risk perception (yes/no); alcohol consumption (everyday, at least once a week, less than once a week, never, no answer); and having HIV or any STI (those having HIV, syphilis, gonorrhoea or chlamydia were grouped into positive and the rest as negative).

1  
2  
3 Given the skewed distribution, all the variables were dichotomized for the analysis. Age was  
4 categorized into  $\leq 25$  years and 26 years or older; education was grouped into literate and  
5 illiterate; occupation into laborers (manual) and non-laborers, marital status as currently married  
6 and never married/widowed/separated/divorced; place of soliciting FSWs into public place and  
7 non-public place; number of FSWs had sex with as  $\leq 3$  FSWs and  $\geq 4$  FSWs; number of sex acts  
8 as  $\leq 4$  times and  $\geq 5$  times; and alcohol use into frequent and infrequent drinkers.  
9  
10  
11  
12  
13  
14  
15  
16  
17

### 18 *Statistical analysis*

19  
20  
21 Descriptive statistics were calculated and used to measure the levels of inconsistent condom use  
22 (during anal intercourse) and other selected variables. Chi-square tests were used to assess the  
23 significance of bivariate relationships between demographic characteristics of clients and their  
24 condom use behaviour during anal intercourse. Multiple logistic regression model was used to  
25 identify factors that were independently predictive of inconsistent condom use during anal  
26 intercourse, with adjusted odds ratio calculated at a significance level less than 0.05. Statistical  
27 calculations were conducted using aggregated data of clients of FSWs from all three states, since  
28 the eligibility criteria for respondents and the methods of sampling and behavioural data  
29 collection were standardized and same in all the three states. Analysis was done by applying  
30 appropriate weights. At the district level, weighting was based on the cluster effect of the sample.  
31 At the aggregate level, standardized weights were calculated by combining the 12 districts.  
32 STATA/SE version 11® (Stata Corporation, College Station, TX) was used for all the analyses.  
33  
34  
35  
36  
37  
38  
39  
40  
41  
42  
43  
44  
45  
46  
47  
48  
49  
50

### 51 **Results**

52  
53  
54 Of the 4,803 clients of FSWs (Andhra Pradesh (n=2016), Tamil Nadu (n=1217), and  
55 Maharashtra (n=1570), 12.3% reported having had anal intercourse in the past six months; 48.4%  
56  
57  
58  
59  
60

1  
2  
3 among them used condoms inconsistently during anal intercourse. In Andhra Pradesh,  
4 Maharashtra and Tamil Nadu those reporting anal sex were 18.9%, 6.5% and 17.7% respectively.  
5  
6 Condom use during anal and vaginal sex varied widely in the different states (**Figure 2**) and  
7  
8 since only a small proportion of clients in each of these states reported anal sex, the findings are  
9  
10 based on an aggregate analysis. .  
11  
12  
13  
14  
15  
16  
17  
18  
19

20 As presented in Table 1, the bivariate analysis shows that the majority of inconsistent condom  
21 users were ages 26 years or older (84.3%), married (79.8 %) and solicited FSWs from public  
22 places (77.1 %). Literacy levels were lower among inconsistent condom users than among  
23 consistent condom users (50.0 % vs. 85.2 %,  $p=0.003$ ). Similarly, a lower proportion of  
24 inconsistent condom users reported having had anal intercourse with a man than consistent  
25 condom users (18.7 % vs. 39.4 %,  $p=0.022$ ). A higher proportion of inconsistent condom users  
26 consumed alcohol frequently (56.0 % vs. 37.5%,  $p=0.031$ ) and considered themselves at risk of  
27 exposure to HIV than consistent condom users (47.9 % vs. 7.13 %,  $p=0.000$ ). More than 30 %  
28 inconsistent condom users tested positive for HIV/STI, compared to a smaller proportion of  
29 consistent condom users (32.3 % vs. 9.7 %,  $p=0.085$ ), but the association is not significant.  
30  
31  
32  
33  
34  
35  
36  
37  
38  
39  
40  
41  
42

43 Table 2 shows the independent factors associated with inconsistent condom use during anal  
44 intercourse with FSWs. Clients of FSWs who were ages 26 years or older (AOR: 2.68,  $p=0.032$ ),  
45 employed as manual laborers (AOR: 2.43,  $p=0.013$ ), consumed alcohol (AOR: 2.63,  $p=0.001$ ),  
46 reported five or more sex acts with FSWs in the past month (AOR: 2.53,  $p=0.031$ ), and perceived  
47 themselves to be at higher risk for HIV (AOR: 4.82,  $p=0.001$ ) were more likely to inconsistently  
48 use condoms during anal intercourse than their counterparts. On the other hand, clients who were  
49  
50  
51  
52  
53  
54  
55  
56  
57  
58  
59  
60



1  
2  
3 currently married (AOR: 0.41, p=0.056) and had sex with more number of FSWs ( $\geq 4$  and above)  
4  
5 in the past month were less likely to inconsistently use condoms during anal intercourse than  
6  
7 those never married/separated/divorced/widowed and who had sex with less than three FSWs.  
8  
9 Testing positive for HIV or STI was not found to be associated with inconsistency in condom use  
10  
11 during anal intercourse. Similarly, factors such as literacy level, place where the client solicited  
12  
13 FSWs and whether he had had anal sex with a male/hijra partner were not associated with  
14  
15 inconsistency in condom use during anal intercourse.  
16  
17  
18  
19  
20  
21  
22  
23

## 24 Discussion

25  
26  
27 IBBA, one of the few surveys in India to study large samples of clients of FSWs, has  
28  
29 documented the practice of unprotected anal intercourse in three high HIV prevalence states of  
30  
31 the country. Its findings show that anal intercourse is a substantial part of the commercial sex  
32  
33 activity in India, with about 12 percent clients reporting experience of anal intercourse and  
34  
35 nearly half of them not using condoms during anal intercourse with FSWs. The profile of clients  
36  
37 who reported having unprotected anal intercourse with FSW varied from clients who did not  
38  
39 report unprotected sex. Clients who were 26 years or older, frequently used alcohol, worked as  
40  
41 manual laborers and reported higher number of sex acts with FSWs were at an increased risk of  
42  
43 unprotected anal intercourse.  
44  
45  
46  
47  
48

49 In the absence of comparable estimates on anal intercourse from client surveys in India, we  
50  
51 examined the estimates available from studies on FSWs<sup>13 14 18 28</sup> and the reported prevalence  
52  
53 ranged from 11.9% to 22.0% . It was apparent from these studies that there is a high demand for  
54  
55 anal sex from male clients of FSWs (above 40.0%). When compared with the prevalence  
56  
57  
58  
59  
60

1  
2  
3 reported by FSWs in these studies, the prevalence reported by clients in the current analysis  
4  
5 is comparable and an almost similar prevalence was reported by FSWs in round one of IBBA<sup>28</sup>.  
6  
7

8 Anal sex is certainly stigmatized among FSWs and they have a reason to under report this  
9  
10 behavior, however, we don't know if it is similar for men.  
11  
12

13  
14 The finding that older clients are at a higher risk of inconsistent condom use has been reported  
15  
16 previously. Inconsistent condom use during vaginal intercourse with FSWs was found to be  
17  
18 significantly associated with older clients.<sup>2</sup> The average age of marriage for Indian men is  
19  
20 documented to be 26 years, and a majority of men (clients of FSWs) in this sample were married.  
21  
22

23 A possible explanation for this risky behavior among older men could be the need to fulfill  
24  
25 sexual desires or experimentation, followed by the belief that paying for sex would be less  
26  
27 troublesome and more entertaining than sexual involvement with a non-sex worker.<sup>29</sup> It could  
28  
29 also be plausible that inability of the older men to maintain erections may have resulted in  
30  
31 inconsistent use of condoms during anal sex when compared to younger men. Older men who  
32  
33 have sex with men have also been found to practice risky sexual behavior like inconsistent  
34  
35 condom use.<sup>30</sup>  
36  
37  
38

39 Likewise, clients who were manual laborers were more likely to be inconsistent condom users,  
40  
41 compared to those in other occupations (white collar workers). The manual laborers in the  
42  
43 current study include agricultural and non-agricultural laborers and cultivators. It is possible that  
44  
45 many of these men migrated for work and stay away from their families. Additional analysis was  
46  
47 undertaken to understand this dimension better; more than 50 % respondents reported travelling  
48  
49 in the past one year, primarily for work. These men also reported buying sex from FSWs. Given  
50  
51 this scenario, it is imperative that tailored interventions be designed for those involved in manual  
52  
53 labor, who are often difficult to engage in prevention programs. These men could be captured  
54  
55  
56  
57  
58  
59  
60

1  
2  
3 through networks of labor contractors and migrant populations. Educational campaigns and  
4 counseling are also important to promote condom use for all partners and all types of sex.  
5

6  
7  
8 Our study also found that clients with higher self-perceived risk for HIV were more likely to be  
9 inconsistent condom users. Such an association could be attributed to the fact that knowledge  
10 and perceptions about safe or risky sex may not be sufficient to change an individual's behavior  
11 until self-efficacy and determination in executing a behavior or action are present.<sup>31</sup> Studies that  
12 have used the self-efficacy model among heterosexually active students have documented that  
13 risk perceptions have no influence over condom use, as was noted in this study.<sup>8 32</sup> Another  
14 plausible reason could be the lack of targeted interventions for clients, which, if present, could  
15 have inculcated a sense of responsibility toward their sexual partners.  
16  
17  
18  
19  
20  
21  
22  
23  
24  
25

26  
27  
28 Men who consume alcohol have been found more likely to engage in unprotected sex and anal  
29 sex and have more than 10 FSW partners.<sup>33</sup> A similar association was observed in our study,  
30 where clients who consumed alcohol frequently and reported five or more sexual encounters  
31 were found to inconsistently use condoms during anal intercourse. It seems that the survey has  
32 been able to capture high-risk clients, who have higher volume of sex acts with FSWs, engage in  
33 anal intercourse and do not use condoms. Alcohol use and its association with HIV-related  
34 sexual risk is well documented.<sup>33-35</sup> HIV prevention interventions must address this important  
35 issue linked with compromise in safe sex practices/behavior. There is a clear need for HIV  
36 prevention interventions tailored to provide information on alcohol related sexual risk.  
37  
38  
39  
40  
41  
42  
43  
44  
45  
46  
47  
48

49  
50 Although studies from the early 1990s have highlighted anal intercourse as a risk factor for  
51 HIV,<sup>9 36</sup> most AIDS prevention messages targeting heterosexuals continue to focus only on  
52 vaginal and oral sex transmission. Cultural taboos have possibly played a major role against  
53 acknowledging anal sexual practice. Research on vulnerable populations, including FSWs and  
54  
55  
56  
57  
58  
59  
60

1  
2  
3 youth, indicate that the persons particularly at risk of being infected by or transmitting HIV are  
4 more likely to practice anal intercourse.<sup>37</sup> Furthermore, people with experience in anal  
5 intercourse have been found to take more sexual risk when engaging in vaginal intercourse than  
6 those without anal experience.<sup>8</sup> Another important aspect is the condom negotiating ability of sex  
7 workers with clients. Factors in the physical, economic and policy environment influence  
8 condom use. In addition, the gendered power dynamics and the lack of choice sex workers have  
9 with heterosexual anal intercourse exacerbates their vulnerability. Sex workers need to be  
10 empowered to negotiate condom use with clients and motivate unwilling clients to use condoms  
11 during anal/vaginal sex.<sup>38</sup>

### 28 **Limitations of the study**

31  
32 Our study has its limitations. For one, both anal intercourse and condom use are self-reported  
33 measures and may, therefore, be influenced by the social desirability bias. As indicated by  
34 previous research, the social desirability bias gives rise to the possibility of underreporting.  
35 Given the difficulty in evaluating the magnitude of underreporting, we must be cautious in  
36 concluding that anal intercourse is practiced at relatively low rates among this population.  
37 Further, we did not have information on anal intercourse with regular female partners to establish  
38 concurrency or multidirectional risk during anal intercourse. Also, the survey did not gather  
39 information on violence/coercion during anal sex. Future studies need to address these gaps. In  
40 addition, qualitative studies are needed to better understand the context in which anal intercourse  
41 occurs. In spite of these limitations, this is one of the first studies to document for the clients of  
42 FSWs the practice of anal intercourse and the correlates of condom use during anal intercourse.

## Conclusions

The study indicates that HIV prevention programs targeting FSWs and their clients must highlight the increased risk unprotected anal intercourse poses for both self and partners. Condoms and water-based lubricants need to be marketed to reduce these risks. Interventions also need to address factors that influence condom negotiation ability of sex workers. Given the multidirectional risk, condom promotion programs must be extended to include specific information on the benefits of consistent condom use while engaging in anal and other types of sex. Safer sex messages addressing heterosexual anal intercourse need to be incorporated into HIV prevention interventions for both FSWs and their clients. Current prevention programs fail to address this issue. Greater emphasis in AIDS/STI prevention must be given to this typically stigmatized and underreported sexual practice.

## Contributors

SR and KN contributed to concept development, data analysis and interpretation, and writing and finalization of the manuscript. LR, PG, DY, SS, BG, HR, TS, and RSP contributed to concept design, review and finalization of the manuscript.

## References:

1. National AIDS Control Organisation MoHaFW, Government of India. 2006. New Delhi, National Behavioural Surveillance Survey (BSS)-Female Sex Workers (FSWs) and their Clients.
2. Subramanian T, Gupte MD, Paranjape RS, et al. HIV, sexually transmitted infections and sexual behaviour of male clients of female sex workers in Andhra Pradesh, Tamil Nadu and Maharashtra, India: results of a cross-sectional survey. *AIDS* 2008 **22** ( 5):S69-79. .
3. McBride KR, Fortenberry JD. Heterosexual anal sexuality and anal sex behaviors: a review. *Journal of sex research* 2010;**47**(2):123-36.
4. Voeller B. AIDS and heterosexual anal intercourse. (0004-0002 (Print)).
5. Suryawanshi D, Bhatnagar T, Deshpande S, et al. Diversity among Clients of Female Sex Workers in India: Comparing Risk Profiles and Intervention Impact by Site of Solicitation. Implications for the Vulnerability of Less Visible Female Sex Workers. *PloS one* 2013;**8**(9):e73470.
6. National AIDS Control Organisation MoHaFW, Government of India. HIV Sentinel Surveillance 2010-11: A Technical Brief. New Delhi, 2012.
7. Samet JH, Pace CA, Cheng DM, et al. Alcohol use and sex risk behaviors among HIV-infected female sex workers (FSWs) and HIV-infected male clients of FSWs in India. *AIDS Behav* 2010;**14** (1):S74-83.
8. Baldwin JI, Baldwin JD. Heterosexual anal intercourse: an understudied, high-risk sexual behavior. *Archives of sexual behavior* 2000;**29**(4):357-73.
9. Halperin DT. Heterosexual anal intercourse: prevalence, cultural factors, and HIV infection and other health risks, Part I. *AIDS patient care and STDs* 1999;**13**(12):717-30.
10. Bradley J, Rajaram S, Moses S, et al. Female sex worker client behaviors lead to condom breakage: a prospective telephone-based survey in Bangalore, South India. *AIDS and behavior* 2013;**17**(2):559-67.
11. Priddy FH, Wakasiaka S, Hoang TD, et al. Anal sex, vaginal practices, and HIV incidence in female sex workers in urban Kenya: implications for the development of intravaginal HIV prevention methods. *AIDS research and human retroviruses* 2011;**27**(10):1067-72.
12. Bradley J, Rajaram S, Alary M, et al. Determinants of condom breakage among female sex workers in Karnataka, India. *BMC public health* 2011;**11 Suppl 6**:S14.
13. Beattie TS, Bradley JE, Vanta UD, et al. Vulnerability re-assessed: the changing face of sex work in Guntur district, Andhra Pradesh. *AIDS care* 2013;**25**(3):378-84.
14. Tucker S, Krishna R, Prabhakar P, et al. Exploring dynamics of anal sex among female sex workers in Andhra Pradesh. *Indian journal of sexually transmitted diseases* 2012;**33**(1):9-15.
15. Schwandt M Fau - Morris C, Morris C Fau - Ferguson A, Ferguson A Fau - Ngugi E, et al. Anal and dry sex in commercial sex work, and relation to risk for sexually transmitted infections and HIV in Meru, Kenya. *Sex Transm Infect* 2006 (1368-4973 (Print)).
16. Heywood W, Smith AM. Anal sex practices in heterosexual and male homosexual populations: a review of population-based data. *Sexual health* 2012;**9**(6):517-26.
17. Veldhuijzen NJ IC, Luchters S, Bosire W, Braunstein S, Chersich M, van de Wijgert J. Anal intercourse among female sex workers in East Africa is associated with other high-risk behaviours for HIV. *Sex Health* 2011 **8**(2):251-4.
18. Patra RK, Mahapatra B, Kovvali D, et al. Anal sex and associated HIV-related sexual risk factors among female sex workers in Andhra Pradesh, India. *Sexual health* 2012;**9**(5):430-7.
19. M. A. A Blind Spot in HIV prevention-Female Anal Sex.
20. Allen B, Cruz-Valdez A, Rivera-Rivera L, et al. [Affection, kisses, and condoms: the ABC of sexual practices of female sex workers in Mexico City]. *Salud publica de Mexico* 2003;**45 Supp 5**:S594-607.

21. Decker Mr Fau - McCauley HL, McCauley HI Fau - Phuengsamran D, Phuengsamran D Fau - Janyam S, et al. Violence victimisation, sexual risk and sexually transmitted infection symptoms among female sex workers in Thailand. (1472-3263 (Electronic)).
22. Saidel T, Adhikary R, Mainkar M, et al. Baseline integrated behavioural and biological assessment among most at-risk populations in six high-prevalence states of India: design and implementation challenges. *AIDS (London, England)* 2008;**22**:S17-S34 10.1097/01.aids.0000343761.77702.04.
23. Myers T, Rowe CJ, Tudiver FG, et al. HIV, substance use and related behaviour of gay and bisexual men: an examination of the talking sex project cohort. *British journal of addiction* 1992;**87**(2):207-14.
24. Mimiaga MJ, Thomas B, Mayer KH, et al. Alcohol use and HIV sexual risk among MSM in Chennai, India. *International journal of STD & AIDS* 2011;**22**(3):121-5.
25. Greene E, Frye V, Mansergh G, et al. Correlates of unprotected vaginal or anal intercourse with women among substance-using men who have sex with men. *AIDS and behavior* 2013;**17**(3):889-99.
26. Mahapatra B, Lowndes CM, Mohanty SK, et al. Factors associated with risky sexual practices among female sex workers in Karnataka, India. *PloS one* 2013;**8**(4):e62167.
27. Grov C, Wolff M, Smith MD, et al. Male Clients of Male Escorts: Satisfaction, Sexual Behavior, and Demographic Characteristics. *Journal of sex research* 2013.
28. Alexander M, Mainkar M, Deshpande S, et al. Heterosexual anal sex among female sex workers in high HIV prevalence states of India: need for comprehensive intervention. *PloS one* 2014;**9**(2):e88858.
29. Pitts MK, Smith Am Fau - Grierson J, Grierson J Fau - O'Brien M, et al. Who pays for sex and why? An analysis of social and motivational factors associated with male clients of sex workers. (0004-0002 (Print)).
30. Ramanathan S, Chakrapani V, Ramakrishnan L, et al. Consistent condom use with regular, paying, and casual male partners and associated factors among men who have sex with men in Tamil Nadu, India: findings from an assessment of a large-scale HIV prevention program. *BMC public health* 2013;**13**(1):827.
31. Bandura A. Perceived self-efficacy in the exercise of control over AIDS infection. *Evaluation and Program Planning* 1990;**13**(1):9-17.
32. Wulfert E WC. Condom use: a self-efficacy model. *Health Psychol* 1993 **12**(5):346-53.
33. Madhivanan P HA, Gogate A, Stein E, Gregorich S, Setia M, Kumta S, Ekstrand M, Mathur M, Jerajani H, Lindan CP. Alcohol use by men is a risk factor for the acquisition of sexually transmitted infections and human immunodeficiency virus from female sex workers in Mumbai, India. *Sexually transmitted diseases* 2005;**32**(11):685-90.
34. Schensul J, Singh SK, Gupta K, et al. Alcohol and HIV in India: A Review of Current Research and Intervention. *AIDS and behavior* 2010;**14**(1):1-7.
35. Mimiaga MJ, Thomas B, Mayer KH, et al. Alcohol use and HIV sexual risk among MSM in Chennai, India. *International journal of STD & AIDS* 2011;**22**(3):121-25.
36. Erickson PI, Bastani R, Maxwell AE, et al. Prevalence of anal sex among heterosexuals in California and its relationship to other AIDS risk behaviors. *AIDS education and prevention : official publication of the International Society for AIDS Education* 1995;**7**(6):477-93.
37. Stulhofer A, Bacak V. Is anal sex a marker for sexual risk-taking? Results from a population-based study of young Croatian adults. *Sexual health* 2011;**8**(3):384-9.
38. Bharat S, Mahapatra B, Roy S, et al. Are Female Sex Workers Able to Negotiate Condom Use with Male Clients? The Case of Mobile FSWs in Four High HIV Prevalence States of India. *PloS one* 2013;**8**(6):e68043.

1  
2  
3  
4  
5  
6  
7  
8  
9  
10  
11  
12  
13  
14  
15  
16  
17  
18  
19  
20  
21  
22  
23  
24  
25  
26  
27  
28  
29  
30  
31  
32  
33  
34  
35  
36  
37  
38  
39  
40  
41  
42  
43  
44  
45  
46  
47  
48  
49  
50  
51  
52  
53  
54  
55  
56  
57  
58  
59  
60

For peer review only



**Table 1: Characteristics of clients of FSWs who reported anal intercourse (past six months) with occasional and regular FSWs and condom use**

| Characteristics                                                 | Consistent condom users<br>(n=397, 51.5%)<br>% (number) | Inconsistent condom users<br>(n=280, 48.4%)<br>% (number) | p-value |
|-----------------------------------------------------------------|---------------------------------------------------------|-----------------------------------------------------------|---------|
| Age                                                             |                                                         |                                                           |         |
| ≤25 years                                                       | 27.1 (117)                                              | 15.6 (53)                                                 | 0.165   |
| 26 years or older                                               | 72.8 (280)                                              | 84.3 (227)                                                |         |
| Education                                                       |                                                         |                                                           |         |
| Illiterate                                                      | 14.8 (64)                                               | 49.9 (57)                                                 | 0.003   |
| Literate                                                        | 85.2 (333)                                              | 50.0 (223)                                                |         |
| Marital status                                                  |                                                         |                                                           |         |
| Never married/widowed/separated/divorced                        | 29.8 (120)                                              | 20.11 (84)                                                | 0.266   |
| Currently married                                               | 70.1 (277)                                              | 79.8 (196)                                                |         |
| Occupation                                                      |                                                         |                                                           |         |
| Non-laborer (students/business/service)                         | 51.4 (214)                                              | 46.1 (90)                                                 | 0.749   |
| Manual laborer (agricultural/non-agricultural labor/cultivator) | 48.5 (181)                                              | 53.8 (190)                                                |         |
| Place solicited FSWs                                            |                                                         |                                                           |         |
| Non-public place (brothel/home/lodge/dhaba)                     | 30.6 (117)                                              | 22.9 (93)                                                 | 0.448   |
| Public place                                                    | 69.3 (278)                                              | 77.1 (186)                                                |         |
| No. of FSWs had sex with in the past one month                  |                                                         |                                                           |         |
| ≤3 FSWs                                                         | 72.3 (324)                                              | 86.4 (229)                                                | 0.088   |
| ≥ 4 FSWs and above                                              | 27.6 (73)                                               | 13.5 (51)                                                 |         |
| No. of sex acts with FSWs in the past one month                 |                                                         |                                                           |         |
| ≤ 4 times                                                       | 73.7 (285)                                              | 76.0 (184)                                                | 0.812   |
| ≥ 5 and above                                                   | 26.2 (111)                                              | 23.9 (95)                                                 |         |
| Perceive to be at high risk of exposure to HIV                  |                                                         |                                                           |         |
| No                                                              | 92.8 (337)                                              | 52.0 (188)                                                | 0.000   |
| Yes                                                             | 7.13 (39)                                               | 47.9 (82)                                                 |         |
| Alcohol user                                                    |                                                         |                                                           |         |
| Infrequent drinker                                              | 62.4 (262)                                              | 43.9 (142)                                                | 0.031   |
| Frequent drinker (everyday)                                     | 37.5 (116)                                              | 56.0 (121)                                                |         |
| Ever had anal intercourse with a man/hijra                      |                                                         |                                                           |         |
| No                                                              | 60.5 (311)                                              | 81.2 (179)                                                | 0.022   |
| Yes                                                             | 39.4 (86)                                               | 18.7 (101)                                                |         |
| Any HIV/STIs                                                    |                                                         |                                                           |         |
| Negative                                                        | 90.2 (367)                                              | 67.6 (253)                                                | 0.085   |
| Positive                                                        | 9.7 (30)                                                | 32.3 (27)                                                 |         |

**Table 2: Independent factors associated with inconsistent condom use during anal intercourse with FSWs in multivariate analysis**

| Characteristics                                                 | Crude odds ratio (95% CI) | p-value | Adjusted odds ratio (95% CI) | p-value |
|-----------------------------------------------------------------|---------------------------|---------|------------------------------|---------|
| Age                                                             |                           |         |                              |         |
| ≤25 years                                                       | Referent                  |         | Referent                     |         |
| 26 years or older                                               | 2.00 (0.74-5.40)          | 0.170   | 2.68 (1.09-6.61)             | 0.032   |
| Education                                                       |                           |         |                              |         |
| Illiterate                                                      | Referent                  |         | Referent                     |         |
| Literate                                                        | 0.17 (0.05-0.59)          | 0.005   | 0.66 (0.28-1.56)             | 0.347   |
| Occupation                                                      |                           |         |                              |         |
| Non-laborer (student/business/service)                          | Referent                  |         | Referent                     |         |
| Manual laborer (agricultural/non-agricultural labor/cultivator) | 1.23 (0.33-4.48)          | 0.749   | 2.43 (1.21-4.90)             | 0.013   |
| Marital status                                                  |                           |         |                              |         |
| Never married/widowed/separated /divorced                       | Referent                  |         | Referent                     |         |
| Currently married                                               | 1.69 (0.66-4.31)          | 0.269   | 0.32 (0.13-0.80)             | 0.015   |
| Place solicited FSWs                                            |                           |         |                              |         |
| Non-public place (brothel/home/lodge/dhaba)                     | Referent                  |         | Referent                     |         |
| Public place                                                    | 1.49 (0.52-4.20)          | 0.449   | 1.26 (0.60-2.61)             | 0.533   |
| No. of FSWs had sex with in the past one month                  |                           |         |                              |         |
| ≤3 FSWs                                                         | Referent                  |         | Referent                     |         |
| ≥4 FSWs and above                                               | 0.41 (0.14-1.16)          | 0.094   | 0.29 (0.10-0.84)             | 0.022   |
| No. of sex acts with FSWs in the past one month                 |                           |         |                              |         |
| ≤4 times                                                        | Referent                  |         | Referent                     |         |
| ≥5 and above                                                    | 0.88 (0.32-2.41)          | 0.812   | 2.53 (0.09-5.90)             | 0.031   |
| Perceive to be at high risk of exposure to HIV                  |                           |         |                              |         |
| No                                                              | Referent                  |         | Referent                     |         |
| Yes                                                             | 11.99 (3.08-46.5)         | 0.000   | 4.82 (1.91-12.14)            | 0.001   |
| Alcohol user                                                    |                           |         |                              |         |
| Infrequent drinker                                              | Referent                  |         | Referent                     |         |
| Frequent drinker (everyday)                                     | 2.11 (1.06-4.20)          | 0.033   | 2.63 (1.46-4.71)             | 0.001   |
| Ever had anal intercourse with a man/hijra                      |                           |         |                              |         |
| No                                                              | Referent                  |         | Referent                     |         |
| Yes                                                             | 0.35 (0.14-0.87)          | 0.025   | 0.76 (0.39-1.50)             | 0.440   |
| Any HIV/STIs                                                    |                           |         |                              |         |
| Negative                                                        | Referent                  |         | Referent                     |         |
| Positive                                                        | 4.42 (0.74-26.32)         | 0.102   | 0.73 (0.25-2.12)             | 0.568   |

1  
2  
3  
4  
5  
6  
7  
8  
9  
10  
11  
12  
13  
14  
15  
16  
17  
18  
19  
20  
21  
22  
23  
24  
25  
26  
27  
28  
29  
30  
31  
32  
33  
34  
35  
36  
37  
38  
39  
40  
41  
42  
43  
44  
45  
46  
47  
48  
49  
50  
51  
52  
53  
54  
55  
56  
57  
58  
59  
60

For peer review only

1  
2  
3  
4  
5  
6  
7  
8  
9  
10  
11  
12  
13  
14  
15  
16  
17  
18  
19  
20  
21  
22  
23  
24  
25  
26  
27  
28  
29  
30  
31  
32  
33  
34  
35  
36  
37  
38  
39  
40  
41  
42  
43  
44  
45  
46  
47  
48  
49  
50  
51  
52  
53  
54  
55  
56  
57  
58  
59  
60

**Figure 1:** Conceptual framework of factors related with inconsistent condom use during anal intercourse

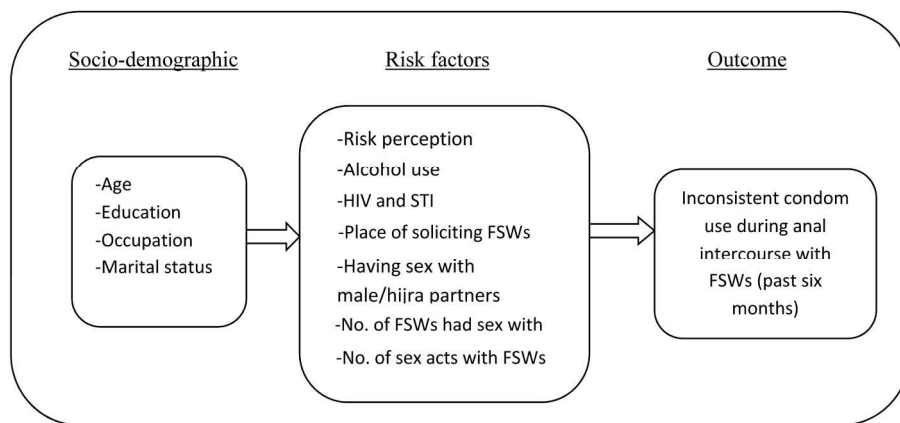

179x98mm (300 x 300 DPI)

review only

Figure-2 : Proportions of reported anal-vaginal sex and consistent condom use among male clients of regular and occasional FSWs in Andhra Pradesh (AP) , Maharashtra(MH) and Tamil Nadu(TN)

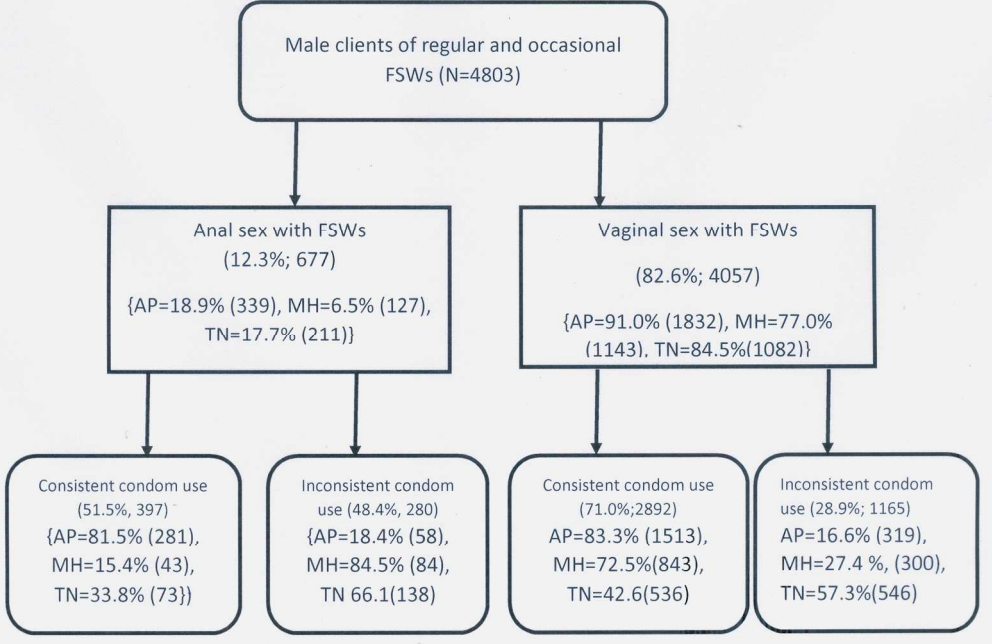

177x129mm (300 x 300 DPI)

View only

STROBE 2007 (v4) Statement—Checklist of items that should be included in reports of *cross-sectional studies*

| Section/Topic                | Item # | Recommendation                                                                                                                                                                       | Reported on page # |
|------------------------------|--------|--------------------------------------------------------------------------------------------------------------------------------------------------------------------------------------|--------------------|
| Title and abstract           | 1      | (a) Indicate the study's design with a commonly used term in the title or the abstract                                                                                               | 3                  |
|                              |        | (b) Provide in the abstract an informative and balanced summary of what was done and what was found                                                                                  | 3-4                |
| <b>Introduction</b>          |        |                                                                                                                                                                                      |                    |
| Background/rationale         | 2      | Explain the scientific background and rationale for the investigation being reported                                                                                                 | 6                  |
| Objectives                   | 3      | State specific objectives, including any pre-specified hypotheses                                                                                                                    | 7,9                |
| <b>Methods</b>               |        |                                                                                                                                                                                      |                    |
| Study design                 | 4      | Present key elements of study design early in the paper                                                                                                                              | 7,8,9              |
| Setting                      | 5      | Describe the setting, locations, and relevant dates, including periods of recruitment, exposure, follow-up, and data collection                                                      | 7,8                |
| Participants                 | 6      | (a) Give the eligibility criteria, and the sources and methods of selection of participants                                                                                          | 7,8                |
| Variables                    | 7      | Clearly define all outcomes, exposures, predictors, potential confounders, and effect modifiers. Give diagnostic criteria, if applicable                                             | 9,10               |
| Data sources/<br>measurement | 8*     | For each variable of interest, give sources of data and details of methods of assessment (measurement). Describe comparability of assessment methods if there is more than one group | 9,10               |
| Bias                         | 9      | Describe any efforts to address potential sources of bias                                                                                                                            | -                  |
| Study size                   | 10     | Explain how the study size was arrived at                                                                                                                                            | -                  |
| Quantitative variables       | 11     | Explain how quantitative variables were handled in the analyses. If applicable, describe which groupings were chosen and why                                                         | 10,11              |
| Statistical methods          | 12     | (a) Describe all statistical methods, including those used to control for confounding                                                                                                | 10,11              |
|                              |        | (b) Describe any methods used to examine subgroups and interactions                                                                                                                  | -                  |
|                              |        | (c) Explain how missing data were addressed                                                                                                                                          | -                  |
|                              |        | (d) If applicable, describe analytical methods taking account of sampling strategy                                                                                                   | -                  |
|                              |        | (e) Describe any sensitivity analyses                                                                                                                                                | -                  |
| <b>Results</b>               |        |                                                                                                                                                                                      |                    |

|                          |     |                                                                                                                                                                                                              |        |
|--------------------------|-----|--------------------------------------------------------------------------------------------------------------------------------------------------------------------------------------------------------------|--------|
| Participants             | 13* | (a) Report numbers of individuals at each stage of study—eg numbers potentially eligible, examined for eligibility, confirmed eligible, included in the study, completing follow-up, and analysed            | 11, 12 |
|                          |     | (b) Give reasons for non-participation at each stage                                                                                                                                                         | -      |
|                          |     | (c) Consider use of a flow diagram                                                                                                                                                                           | -      |
| Descriptive data         | 14* | (a) Give characteristics of study participants (eg demographic, clinical, social) and information on exposures and potential confounders                                                                     | 11, 12 |
|                          |     | (b) Indicate number of participants with missing data for each variable of interest                                                                                                                          | -      |
| Outcome data             | 15* | Report numbers of outcome events or summary measures                                                                                                                                                         | 11, 12 |
| Main results             | 16  | (a) Give unadjusted estimates and, if applicable, confounder-adjusted estimates and their precision (eg, 95% confidence interval). Make clear which confounders were adjusted for and why they were included | 11, 12 |
|                          |     | (b) Report category boundaries when continuous variables were categorized                                                                                                                                    | -      |
|                          |     | (c) If relevant, consider translating estimates of relative risk into absolute risk for a meaningful time period                                                                                             | -      |
| Other analyses           | 17  | Report other analyses done—eg analyses of subgroups and interactions, and sensitivity analyses                                                                                                               | -      |
| <b>Discussion</b>        |     |                                                                                                                                                                                                              |        |
| Key results              | 18  | Summarise key results with reference to study objectives                                                                                                                                                     | 12, 13 |
| Limitations              | 19  | Discuss limitations of the study, taking into account sources of potential bias or imprecision. Discuss both direction and magnitude of any potential bias                                                   | 15     |
| Interpretation           | 20  | Give a cautious overall interpretation of results considering objectives, limitations, multiplicity of analyses, results from similar studies, and other relevant evidence                                   | 15, 16 |
| Generalisability         | 21  | Discuss the generalisability (external validity) of the study results                                                                                                                                        | 15, 16 |
| <b>Other information</b> |     |                                                                                                                                                                                                              |        |
| Funding                  | 22  | Give the source of funding and the role of the funders for the present study and, if applicable, for the original study on which the present article is based                                                | 17     |

\*Give information separately for cases and controls in case-control studies and, if applicable, for exposed and unexposed groups in cohort and cross-sectional studies.

**Note:** An Explanation and Elaboration article discusses each checklist item and gives methodological background and published examples of transparent reporting. The STROBE checklist is best used in conjunction with this article (freely available on the Web sites of PLoS Medicine at <http://www.plosmedicine.org/>, Annals of Internal Medicine at <http://www.annals.org/>, and Epidemiology at <http://www.epidem.com/>). Information on the STROBE Initiative is available at [www.strobe-statement.org](http://www.strobe-statement.org).
